# Supplementary material for: Association between the concurrence of pre-existing chronic liver disease and worse prognosis in patients with an herb- Polygonum multiflorum thunb. induced liver injury: a case-control study from a specialised liver disease center in China
Source: PubMed Central journal article supplement — BMJ Open. 2019 Jan 15;9(1):e023567. doi: 10.1136/bmjopen-2018-023567 (PMC6340630; doi:10.1136/bmjopen-2018-023567), 2019-01-15
Supplement: bmjopen-2018-023567.draft_revisions.pdf [file bmjopen-2018-023567.draft_revisions.pdf]

# BMJ Open

BMJ Open is committed to open peer review. As part of this commitment we make the peer review history of every article we publish publicly available.

When an article is published we post the peer reviewers' comments and the authors' responses online. We also post the versions of the paper that were used during peer review. These are the versions that the peer review comments apply to.

The versions of the paper that follow are the versions that were submitted during the peer review process. They are not the versions of record or the final published versions. They should not be cited or distributed as the published version of this manuscript.

BMJ Open is an open access journal and the full, final, typeset and author-corrected version of record of the manuscript is available on our site with no access controls, subscription charges or pay-per-view fees (<http://bmjopen.bmj.com>).

If you have any questions on BMJ Open's open peer review process please email [info.bmjopen@bmj.com](mailto:info.bmjopen@bmj.com)

# BMJ Open

## Association between the Concurrence of Pre-existing Chronic Liver Diseases and Malignant Prognosis in Patients with Herb-induced Liver Injury: A Retrospective Observational Cohort Study

|                               |                                                                                                                                                                                                                                                                                                                                                                                                                                                                                                                                                                                                                                                                                                                                                                                                                                                                                                                                                                                                                                                                                                                                                                                                                                                                          |
|-------------------------------|--------------------------------------------------------------------------------------------------------------------------------------------------------------------------------------------------------------------------------------------------------------------------------------------------------------------------------------------------------------------------------------------------------------------------------------------------------------------------------------------------------------------------------------------------------------------------------------------------------------------------------------------------------------------------------------------------------------------------------------------------------------------------------------------------------------------------------------------------------------------------------------------------------------------------------------------------------------------------------------------------------------------------------------------------------------------------------------------------------------------------------------------------------------------------------------------------------------------------------------------------------------------------|
| Journal:                      | <i>BMJ Open</i>                                                                                                                                                                                                                                                                                                                                                                                                                                                                                                                                                                                                                                                                                                                                                                                                                                                                                                                                                                                                                                                                                                                                                                                                                                                          |
| Manuscript ID                 | bmjopen-2018-023567                                                                                                                                                                                                                                                                                                                                                                                                                                                                                                                                                                                                                                                                                                                                                                                                                                                                                                                                                                                                                                                                                                                                                                                                                                                      |
| Article Type:                 | Research                                                                                                                                                                                                                                                                                                                                                                                                                                                                                                                                                                                                                                                                                                                                                                                                                                                                                                                                                                                                                                                                                                                                                                                                                                                                 |
| Date Submitted by the Author: | 19-Apr-2018                                                                                                                                                                                                                                                                                                                                                                                                                                                                                                                                                                                                                                                                                                                                                                                                                                                                                                                                                                                                                                                                                                                                                                                                                                                              |
| Complete List of Authors:     | Jing, Jing; Medical School of Chinese PLA, Department of Integrative Medicine; Beijing 302 Hospital, Division of Integrative Medicine<br>Wang, Rui-lin; Beijing 302 Hospital, Division of Integrative Medicine<br>Zhu, Yun; Beijing 302 Hospital, Division of Integrative Medicine<br>Niu, Ming; Beijing 302 Hospital, Institute of Chinese Herbal Medicine<br>Wang, Li-fu; Beijing 302 Hospital, Division of Integrative Medicine<br>Song, Xue-ai; Beijing 302 Hospital, Division of Integrative Medicine<br>He, Ting-ting; Beijing 302 Hospital, Division of Integrative Medicine<br>Sun, Yong-qiang; Beijing 302 Hospital, Division of Integrative Medicine<br>Zhang, Fan; Beijing 302 Hospital, Division of Integrative Medicine<br>Xu, Wen-tao; Beijing 302 Hospital, Division of Integrative Medicine<br>Yu, Si-miao; Beijing 302 Hospital, Division of Integrative Medicine<br>Guo, Yu-ming; Beijing 302 Hospital, Institute of Chinese Herbal Medicine<br>Bai, Zhao-fang; Beijing 302 Hospital, Institute of Chinese Herbal Medicine<br>Xiao, Xiao-he; Medical School of Chinese PLA, Department of Integrative Medicine; Beijing 302 Hospital, Institute of Chinese Herbal Medicine<br>Wang, Jia-bo; Beijing 302 Hospital, Institute of Chinese Herbal Medicine |
| Keywords:                     | drug-induced liver injury, Herbal medicine < THERAPEUTICS, chronic liver disease, prognosis                                                                                                                                                                                                                                                                                                                                                                                                                                                                                                                                                                                                                                                                                                                                                                                                                                                                                                                                                                                                                                                                                                                                                                              |
|                               |                                                                                                                                                                                                                                                                                                                                                                                                                                                                                                                                                                                                                                                                                                                                                                                                                                                                                                                                                                                                                                                                                                                                                                                                                                                                          |

SCHOLARONE™  
Manuscripts

1  
2  
3  
4 **Association between the Concurrence of Pre-existing Chronic Liver Diseases**  
5  
6 **and Malignant Prognosis in Patients with Herb-induced Liver Injury: A**  
7  
8 **Retrospective Observational Cohort Study**  
9

10 Jing Jing<sup>1,2†</sup>, Rui-lin Wang<sup>2†</sup>, Yun Zhu<sup>2</sup>, Ming Niu<sup>3</sup>, Li-fu Wang<sup>2</sup>, Xue-ai Song<sup>2</sup>, Ting-ting He<sup>2</sup>,  
11 Yong-qiang Sun<sup>2</sup>, Fan Zhang<sup>2</sup>, Wen-tao Xu<sup>2</sup>, Si-miao Yu<sup>2</sup>, Yu-ming Guo<sup>3</sup>, Zhao-fang Bai<sup>3</sup>, Xiao-he  
12 Xiao<sup>1,2\*</sup>, Jia-bo Wang<sup>3\*</sup>  
13  
14  
15

16  
17 <sup>1</sup> Department of Integrative Medicine, Medical School of Chinese PLA, Beijing 100853, China;

18 <sup>2</sup> Division of Integrative Medicine, Beijing 302 Hospital, Beijing 100039, China;

19 <sup>3</sup> Institute of Chinese Herbal Medicine, Beijing 302 Hospital, Beijing 100039, China.  
20  
21

22  
23 <sup>†</sup> Jing Jing and Rui-lin Wang contributed equally to this paper.  
24  
25

26 \* To whom correspondence should be addressed: Jia-bo Wang, China Military Institute of Chinese  
27 Medicine, 302 Military Hospital. Email: pharm\_sci@126.com; Xiao-he Xiao, Medical School of  
28 Chinese PLA; China Military Institute of Chinese Medicine, 302 Military Hospital, Beijing 100039,  
29 China. Email: pharmacy302xxh@126.com. Jia-bo Wang (pharm\_sci@126.com) as show in Scholar  
30 One. Jia-bo Wang and Xiao-he Xiao contributed equally to this paper.  
31  
32  
33  
34  
35  
36  
37  
38  
39  
40  
41  
42  
43  
44  
45  
46  
47  
48  
49  
50  
51  
52  
53  
54  
55  
56  
57  
58  
59  
60

## Abstract

**Objectives:** Herb-induced liver injury (HILI) is a frequent concern in patients with pre-existing chronic liver diseases (CLDs). The present study aimed to evaluate the association between the concurrence of pre-existing CLDs and malignant prognosis in patients with HILI.

**Design:** A retrospective observational cohort study, using data from the electronic medical records; Adjusted analysis using logistic regression.

**Setting:** Tertiary hospital specializing in liver diseases in China.

**Participants:** 145 hospitalized HILI patients and 200 matched CLDs cases were assessed with respect to prognosis by comparing HILI with or without pre-existing CLDs from February 2007 to February 2017.

**Primary outcome measures:** Non-recoverable outcomes, including chronicity and fatality, in HILI patients with or without pre-existing CLDs, and patients with matched CLDs.

**Results:** Of the 7001 hospitalized patients with temporal association between liver injury and drug exposure, 5703 patients met the diagnostic criteria for drug-induced liver injury (DILI), which was attributed to *Polygonum multiflorum* Thunb. (PMT) in 145 patients. Among these HILI patients, 22.8% (33 of 145) had pre-existing CLDs, including 17 (51.5%) with alcoholic liver disease (ALD), 8 (24.2%) with non-alcoholic fatty liver disease (NAFLD), 5 (15.2%) with chronic viral hepatitis and 3 (9.1%) with autoimmune liver disease. Compared with HILI patients without pre-existing CLDs, HILI patients with pre-existing CLDs showed higher mortality (0.9% vs 9.1%,  $p=0.037$ ) and higher chronicity (12.5% vs 30.3%,  $p=0.016$ ). Compared with matched ALD (136 patients) or NAFLD (64 patients) patients, HILI patients with pre-existing ALD showed higher chronicity (35.3% vs 11.8%,  $p=0.019$ ). Multivariate logistic regression analysis found that

1  
2  
3 concurrence of pre-existing CLDs was an independent risk factor for chronicity (OR 3.035, 95%CI:  
4  
5  
6 1.115-8.259,  $p=0.030$ ) and non-recovery (including chronicity and fatality) (OR 3.966, 95% CI:  
7  
8 1.501–10.477,  $p=0.005$ ).  
9

10  
11 **Conclusions:** Concurrence of pre-existing CLDs could be an independent risk factor for malignant  
12  
13 prognosis, especially chronicity, in HILI.  
14

15  
16 **Key words:** drug-induced liver injury; herbal medicine; chronic liver disease; prognosis  
17  
18  
19  
20  
21  
22  
23  
24  
25  
26  
27  
28  
29  
30  
31  
32  
33  
34  
35  
36  
37  
38  
39  
40  
41  
42  
43  
44  
45  
46  
47  
48  
49  
50  
51  
52  
53  
54  
55  
56  
57  
58  
59  
60

**An article summary**

- In the present study, the evidence for the better understanding on the association between concurrence of pre-existing chronic liver diseases and malignant prognosis of HILI was provided.
- As different drugs might have differential effects on prognosis, the HILI cases attributed to the same herb were found in order to avoid the confounding effects of different drugs.
- To investigate the effects of different pre-existing chronic liver diseases (CLDs) on the prognosis of HILI, we also enrolled patients with matched CLDs as the control group, who compared with HILI patients with pre-existing CLDs, according to the matching conditions.
- The enrolled cases involved in the study were from a racially and medically homogeneous background in China.
- Our study was limited by the single-centre nature of the study (ie, a tertiary hospital).

## Introduction

Concurrence of pre-existing chronic liver diseases (CLDs) with drug-induced liver injury (DILI) is a special challenge in clinical settings, which might render the liver sensitive to drug toxicity and cause higher fatality rates<sup>1</sup>. For instance, a case report showed that long-term alcohol intake could potentiate the hepatotoxicity of low doses of acetaminophen<sup>2</sup>. In addition, it was noted that non-alcoholic fatty liver disease (NAFLD) and obesity might increase the risk for acute liver injury caused by several synthetic agents, such as methotrexate and tamoxifen, resulting in more severe liver injury<sup>3-5</sup>. According to published data from the Drug-Induced Liver Injury Network (DILIN), a higher total fatality rate (19.0%) occurred in patients with known pre-existing liver diseases 6 months after the onset of DILI than in those without CLDs (8.1%)<sup>6</sup>. However, these results in DILIN registry could be different from outcomes of DILI patients with pre-existing CLDs in China due to different spectra of CLDs and medication systems. Furthermore, no studies have tested whether the concurrence of pre-existing CLDs is a major risk factor for malignant prognosis in DILI<sup>3</sup>.

In particular, herbal medications are frequently used as alternative or supplementary agents to conventional synthetic drugs to treat chronic diseases in low- and middle-income countries (LMICs). In previous population surveys, herbal and diet supplements (HDS) were used by one-third to one-half of the adult population in developed countries<sup>7</sup>. In a previous population survey of LMICs, the widespread use of traditional Chinese medicines (TCMs) was reported among 24.5% of middle-aged and older patients with chronic diseases in China<sup>8</sup>. However, the risk of herbal hepatotoxicity has not been fully addressed, especially in patients with pre-existing CLDs. It was reported that the herbal formula, Xiao Chai Hu Tang, caused jaundice and abnormal

1  
2  
3 liver function in a middle-aged woman with known pre-existing liver disease<sup>9,10</sup>. In addition, there  
4  
5  
6 has been also a rising trend in the use of HDS in developed countries, although they are not  
7  
8 prescribed by physicians. Therefore, HILI coupled with pre-existing CLDs is a critical and  
9  
10 expanding issue in most of these countries. However, knowledge about the intersection between  
11  
12 herb-induced liver injury (HILI) and pre-existing CLDs has been largely limited.  
13  
14

15  
16 In this study, we analyzed the clinical characteristics and prognosis of HILI, especially in  
17  
18 patients with pre-existing CLDs from a single center in China, and we tested whether the  
19  
20 concurrence of pre-existing CLDs was an independent risk factor for malignant prognosis in HILI.  
21  
22  
23  
24

## 25 **Methods**

### 26 **Study design**

27  
28 This study aimed to investigate the clinical characteristics and prognosis of HILI in patients with  
29  
30 pre-existing CLDs. Since different drugs might have differential effects on prognosis, we screened  
31  
32 all hospitalized patients suspected of having DILI and found the HILI cases attributed to the same  
33  
34 herb in order to avoid the confounding effects of different drugs. Finally, *Polygonum multiflorum*  
35  
36 Thunb. (PMT) was found to be the most frequent herb attributed to HILI, and this herb has been  
37  
38 widely considered to cause hepatotoxicity over the past three decades<sup>11,12</sup>. Then, to determine  
39  
40 the effects of different pre-existing CLDs on the prognosis of HILI, we also enrolled patients with  
41  
42 matched CLDs (1:8) as the control group. The matching conditions included sex, age, body mass  
43  
44 index (BMI), type of pre-existing CLD, amount of alcohol ingested and the presence or absence of  
45  
46 cirrhosis.  
47  
48  
49  
50  
51  
52  
53

### 54 **Patient and public involvement**



1  
2  
3 This retrospective cohort study was performed in Beijing 302 Hospital, a tertiary hospital  
4  
5  
6 specializing in liver diseases in the Capital Region of China. We examined inpatients who met the  
7  
8 diagnostic criteria for DILI or HILI from February 2007 to February 2017. Patients were excluded if  
9  
10  
11 they ingested synthetic agents, biological products or Chinese herbal medicines without PMT, or  
12  
13 if they lack data from suspected agents. In this study, we also divided patients with PMT-related  
14  
15 HILI into patients with pre-existing CLDs and those without pre-existing CLDs. Meanwhile,  
16  
17 patients with CLDs were selected and matched with HILI patients with pre-existing CLDs by some  
18  
19 matching conditions. The follow-up visits in eligible cases were scheduled at 6 or 12 months  
20  
21 through telephone dictation or uploaded clinical data from EMR. The patient was defined as lost  
22  
23 to follow-up if we were unable to contact with him or her at follow-up visit for any reason.  
24  
25  
26 Detailed data about demographics, medical history, clinical symptoms and clinical serological  
27  
28 tests in all eligible patients was extracted from the electronic medical record (EMR). The study  
29  
30 protocol was approved by the ethics committee of the 302 Military Hospital, and written  
31  
32 informed consent was obtained from each enrolled patient, guardian or next of kin. The study  
33  
34 flowchart is depicted in [Figure 1](#).

#### 35 36 37 38 39 40 **Diagnostic criteria**

41  
42 DILI or HILI diagnosis was performed according to the ACG clinical guideline for DILI<sup>3</sup>, which  
43  
44 consists of three parts: (i) any recent abnormal liver biochemistry indices; and (ii) chronological  
45  
46 use of all drugs and HDS within 6 months prior to the onset of abnormalities in liver testing; and  
47  
48 (iii) exclusion of recent acute liver injury indicating alternative causes. Abnormal liver  
49  
50 biochemistries should meet any of the three following conditions: (i) only a recent rise in alanine  
51  
52 or aspartate aminotransferase (ALT or AST)  $\geq 5$  times the upper limit of normal (ULN); (ii) alkaline  
53  
54  
55  
56

1  
2  
3  
4 phosphatase (AKP)  $\geq 2$  times ULN; (iii) jaundice [serum total bilirubin (TB)  $\geq 2$  mg/dl] and  
5  
6 elevations of liver enzymes (ALT  $\geq 3$  ULN). For HILI patients with pre-existing CLDs, the ULN was  
7  
8 replaced with the previously obtained baseline value prior to exposure to the suspected drugs.  
9  
10  
11 When assessing alternative causes of HILI, anti-hepatitis A virus IgM, hepatitis B surface antigen,  
12  
13 anti-hepatitis B core IgM, hepatitis B virus DNA, anti-hepatitis C virus, hepatitis C virus RNA,  
14  
15 anti-hepatitis E virus IgM and anti-hepatitis E virus IgG testing, non-hepatotropic virus infection  
16  
17 and acute alcoholism within 3 months prior to onset were considered<sup>3,13-16</sup>. ALD, NAFLD, HBV  
18  
19 and AIH were diagnosed according to clinical practice guidelines<sup>17-22</sup>.

### 22 23 **Procedures**

24  
25 In this study, we assessed clinical patterns of liver injury, causality and severity in all eligible  
26  
27 patients. According to the Council for International Organizations of Medical Sciences scale<sup>23</sup>, the  
28  
29 clinical pattern of DILI, based on identified liver biochemistry abnormalities at onset after intake  
30  
31 of suspected drugs, was defined using R values, where  $R = (\text{ALT}/\text{ULN})/(\text{ALP}/\text{ULN})$ . Hepatocellular  
32  
33 DILI was defined as an R value  $\geq 5$ , cholestatic as  $R \leq 2$  and mixed as  $R > 2$  to  $R < 5$ . Using the Roussel  
34  
35 Uclaf Causality Assessment Method (RUCAM), a typical method for the judgment of a causal  
36  
37 relationship between liver injury and implicated agents<sup>24</sup>, the causality of eligible patients with  
38  
39 HILI was classified into highly probable ( $\geq 9$ ), probable (6-8), possible (3-5), unlikely (1-2), or  
40  
41 excluded ( $\leq 0$ ). According to national and international practice guidelines, the severity  
42  
43 assessments of HILI were categorized into five grades, including mild, moderate, severe, liver  
44  
45 failure and fatal<sup>25,26</sup>. Additionally, the Model for End-Stage Liver Disease (MELD) score was  
46  
47 calculated as follows:  $9.6 * \ln [\text{creatinine (mg/dl)}] + 3.8 * \ln [\text{bilirubin (mg/dl)}] + 11.2 * \ln (\text{INR}) + 6.4$ .

48  
49  
50  
51  
52  
53  
54  
55 The discontinuance of the causal agent(s) and alcohol intake was performed in every eligible

1  
2  
3 patient at HILI or CLDs recognition, and at least 6 months of follow-up is available for those.

4  
5  
6 Chronicity was considered as the elevations of ALT, AST, TB or ALP >1 ULN or hepatic imaging or

7  
8 histological data in line with chronicity after 6 months from the recognition of HILI or CLDs.

9  
10 According to detailed descriptions of the follow-up, all of the eligible patients were categorized

11  
12 with three current outcomes: (i) the recovery group, consisting of cases who had obtained

13  
14 persistent normalization of liver biochemistry after the withdrawal of implicated agent(s) over the

15  
16 6-month follow-up; (ii) the chronic group, including cases with chronicity beyond 6-month

17  
18 follow-up; and (iii) the fatal group, including patients who underwent liver transplantation or

19  
20  
21 died.

#### 22 23 24 25 **Statistics.**

26  
27 The data are characterized by the means  $\pm$  SDs for normal distribution, the median (Q1, Q3) for

28  
29 abnormal distribution and the frequency distributions for categorical variables. Differences

30  
31 between groups in continuous variables were assessed using Student's t-test and one-way

32  
33 analysis of variance (ANOVA) or Wilcoxon's rank-sum test and the Kruskal-Wallis test based on

34  
35 test of normality and homogeneity of variance, respectively. Differences between groups in

36  
37 categorical variables were analyzed by the chi-squared test or Fisher's exact test, while results of

38  
39 multiple comparisons were corrected by the Bonferroni's correction. The identification of factors

40  
41 with  $p$  values less than 0.1 in univariate analysis was explored through multivariable logistic

42  
43 regression analysis. Odds ratios (OR) and 95% confidence intervals (CIs) were calculated from the

44  
45 model coefficients and standard errors.  $p < 0.05$  was considered statistically significant. All of the

46  
47 statistical analyses were performed using Statistical Package for the Social Sciences (SPSS)

48  
49 software, version 19.0 (SPSS Inc., Chicago, IL, USA).

## Results

### Demographics.

Of the 7001 hospitalized patients with temporal association between liver injury and drug exposure among the 193,714 inpatients with liver diseases in the liver unit at Beijing Military 302 Hospital between February 2007 and January 2017, 5703 patients met the diagnostic criteria for DILI, of whom 145 cases were attributed to PMT-related HILI (Figure S1, Table S1 and S2). Among these cases, 33 (22.76%) with HILI had pre-existing CLDs, while 112 cases (77.24%) did not have pre-existing CLDs (Figure 1). Liver biopsies were performed in 10 cases (30.30%) with pre-existing CLDs and in 60 patients (53.57%) without pre-existing CLDs to confirm the diagnosis of HILI. There was no difference in the mean ages between the HILI patients with (45.60 years old, range 21.67-86.74) or without (42.61 years old, range 8.47-70.79) pre-existing CLDs. However, HILI patients with pre-existing CLDs were more likely to be male than those without pre-existing CLDs (67.7% vs 40.2%,  $p=0.007$ ) (Table 1).

### Clinical characteristics

The clinical features of HILI patients with or without pre-existing CLDs are showed in Table 1. Among the 145 enrolled cases with HILI, 22.76% (33 of 145) had pre-existing CLDs, including 17 with alcoholic liver disease (ALD), 8 with non-alcoholic fatty liver disease (NAFLD), 5 with chronic viral hepatitis and 3 with autoimmune liver disease (Figure 1 and Table S3). In particular, the clinical patterns of liver biochemistry in the HILI cases with pre-existing CLDs were similar to those in HILI without pre-existing CLDs, but they were different from those in the matched CLDs patients. Nevertheless, compared to the levels in HILI patients without pre-existing CLDs, higher

1  
2  
3 levels of serum TB (at peak, median, 10.38 vs 18.75 mg/dl,  $p=0.008$ ) and lower levels of serum  
4  
5 albumin (at lowest, median, 35 vs 33 g/l,  $p=0.036$ ) and cholinesterase (at lowest,  
6  
7 5138.79±1659.09 vs 4197.70±1969.99 U/l,  $p=0.007$ ) were found in HILI patients with pre-existing  
8  
9 CLDs. In addition, MELD scores in HILI patients with pre-existing CLDs were significantly higher  
10  
11 than in those without pre-existing CLDs (median, 15 vs 17,  $p=0.038$ ). The main presenting  
12  
13 symptoms, including jaundice (93.9% vs 93.8%), anorexia (72.7% vs 75%), generalized weakness  
14  
15 (72.7% vs 68.8%), nausea (51.5% vs 42.9%), abdominal discomfort (27.3% vs 31.3%) and vomiting  
16  
17 (9.1% vs 16.1%), were all profiled and showed fewer differences in HILI patients with or without  
18  
19 pre-existing CLDs. Further, there were no differences in comorbidities among HILI cases with or  
20  
21 without pre-existing CLDs, except for cardiovascular disease (12.1% vs 1.8%,  $p=0.024$ ) (Table S4).  
22  
23  
24  
25  
26  
27

28 To investigate the impacts of different pre-existing CLDs on HILI, we selected and analyzed  
29  
30 two major types of pre-existing CLDs (ALD and NAFLD) in HILI patients and matched ALD or  
31  
32 NAFLD patients with HILI patients (1:8) that who had corresponding pre-existing CLDs (Table 2  
33  
34 and 3). The compared results indicated that HILI patients with pre-existing ALD or NAFLD had  
35  
36 more severe abnormalities in liver biochemistry, including ALT, AST, ALP, TB, INR, serum albumin  
37  
38 and cholinesterase, than matched ALD or NAFLD patients ( $p$  for all  $<0.05$ ). In all the enrolled HILI  
39  
40 patients with pre-existing CLDs and in those without pre-existing CLDs, male patients accounted  
41  
42 for a larger proportion of HILI patients with pre-existing CLDs than those without pre-existing CLD  
43  
44 ( $p<0.01$ ) (Table 1). However, HILI patients with pre-existing ALD comprised well over 50% of male  
45  
46 patients compared with those without pre-existing CLDs ( $p<0.001$ ), whereas HILI patients with  
47  
48 pre-existing NAFLD showed no sex differences from those without pre-existing CLDs (Table 2 and  
49  
50  
51  
52  
53  
54  
55 3). In contrast, BMI values were significantly higher in HILI cases with pre-existing NAFLD than in  
56  
57  
58  
59  
60

1  
2  
3 HILI cases without pre-existing NAFLD, but there was no difference in HILI cases with or without  
4  
5  
6 pre-existing ALD groups (Tables 2 and 3).  
7

### 8 **Outcomes**

9  
10 Recorded data on clinical outcomes during follow-up visits are shown in Table 1 and Table S5. All  
11  
12 enrolled patients with HILI or CLDs were followed up until the end of the study. Compared with  
13  
14 HILI patients without pre-existing CLDs, HILI patients with pre-existing CLDs had more severe  
15  
16 non-recovery outcomes, including a higher mortality rate (0.9% vs 9.1%,  $p=0.037$ ) and a greater  
17  
18 rate of chronicity (12.5% vs 27.3%,  $p=0.041$ ) (Table 1). Moreover, HILI patients with pre-existing  
19  
20 ALD had higher chronicity (11.8% vs 35.3%,  $p=0.038$ ) and a lower recovery rate (88.2% vs 58.8%,  
21  
22  $p=0.011$ ) than the matched ALD patients (Table 2). Of patients with fatal outcomes, 3 HILI patients  
23  
24 with pre-existing CLDs and 1 HILI patient without a pre-existing CLD died because of hemorrhagic  
25  
26 diseases, whereas all of the matched CLD patients survived. It was noted that the 3 HILI patients  
27  
28 with pre-existing CLDs who died had accompanying by pre-existing alcohol-induced liver cirrhosis  
29  
30 (n=1), inactive chronic virus hepatitis (n=1) and autoimmune liver disease (n=1). In the univariate  
31  
32 logistic regression analysis, the concurrence of pre-existing CLDs was considered a significant risk  
33  
34 factor for malignant outcomes, including non-recovery (OR 4.203, 95% CI: 1.735-10.185,  $p=0.001$ ),  
35  
36 chronicity (OR 3.043, 95% CI: 1.201-7.713,  $p=0.019$ ) and fatality (OR 11.100, 95% CI:  
37  
38 1.114-110.584,  $p=0.040$ ) (Table 4).  
39  
40  
41  
42  
43  
44  
45  
46

47 In the multivariate logistic regression analysis, clinically relevant variables (age and sex) and  
48  
49 those with statistical significance ( $p<0.1$ ) in the univariate analysis (pre-existing CLD, liver  
50  
51 biochemistries and MELD score) were introduced as covariates (Table 4). As variables with known  
52  
53 co-linearity or high correlations, the selection of one predictor for modeling was judged by  
54  
55  
56  
57  
58  
59  
60

1  
2  
3 clinical practice. Multivariate logistic regression analysis showed that the concurrences of  
4  
5 pre-existing CLDs (OR 3.966, 95% CI: 1.501-10.477,  $p=0.005$ ) and peak ALT (OR 0.999, 95% CI:  
6  
7 0.998-1.000,  $p=0.022$ ) were independently associated with non-recovery outcomes, including  
8  
9 chronicity and fatality outcomes. In multivariate logistic regression analysis for different  
10  
11 non-recovery outcomes, the concurrence of pre-existing CLDs was likely to be an independent  
12  
13 risk factor for chronic outcomes of HILI (OR 3.035, 95%CI: 1.115-8.259,  $p=0.030$ ) as well as MELD  
14  
15 scores for fatal outcomes (OR 1.222, 95%CI: 1.052-1.421,  $p=0.009$ ). In addition, the concurrence  
16  
17 of pre-existing CLDs might be a potentially relevant factor with a trend close to significance for  
18  
19 fatal outcomes of HILI ( $p=0.078$ ).  
20  
21  
22  
23  
24  
25  
26  
27

## 28 Discussion

29  
30 In LMICs, herbal medications, rather than synthetic drugs, are frequently used as alternative or  
31  
32 supplementary agents to replace conventional synthetic drugs to treat chronic diseases due to  
33  
34 the lower cost of TCM and limited access to conventional medicines in remote areas of LMICs<sup>27,28</sup>.  
35  
36 In China, many patients are treated for chronic conditions using herbal medications. Thus, this  
37  
38 study might partly explain why the proportion of HILI patients with pre-existing CLDs among all  
39  
40 enrolled HILI patients from China (a LMIC) was markedly higher than the proportion of DILI  
41  
42 patients with pre-existing CLDs among all DILI patients from the United States (a developed  
43  
44 country)<sup>13</sup> (22.8% vs 9.9%, respectively). In addition, the use of HDS and the constituent ratio of  
45  
46 HILI in DILI cohorts appeared to show increasing trends<sup>29</sup>. Self-medication among patients with  
47  
48 CLDs often accounts for a proportion of herbal medication use<sup>27</sup>. Therefore, HILI coupled with  
49  
50 pre-existing CLDs is a critical and expanding issue in most of these countries. However, knowledge  
51  
52  
53  
54  
55  
56

1  
2  
3 about the intersection between HILI and pre-existing CLDs has been limited.  
4  
5

6 In this study, we found that HILI patients with pre-existing CLDs showed higher mortality  
7  
8 (0.9% vs 9.1%,  $p=0.037$ ) and higher chronicity (12.5% vs 30.3%,  $p=0.016$ ) than HILI patients  
9  
10 without pre-existing CLDs. Multivariate logistic regression analysis illustrated that concurrence of  
11  
12 pre-existing CLDs was an independent risk factor for chronicity (OR 3.035, 95%CI: 1.115-8.259,  
13  
14  $p=0.030$ ) and non-recovery (including chronicity and fatality) (OR 3.966, 95% CI: 1.501–10.477,  
15  
16  $p=0.005$ ). Thus, the concurrence of pre-existing CLDs is likely to be an independent risk factor for  
17  
18 malignant prognosis, especially chronicity, in HILI. These results provide new insights into the  
19  
20 clinical management of alternative treatment with herbal medications, especially in patients with  
21  
22 pre-existing CLDs.  
23  
24  
25  
26

27  
28 In addition, we noted that ALD was the primary type of pre-existing CLD involved in HILI,  
29  
30 followed by non-alcoholic fatty liver disease (NAFLD), chronic viral hepatitis and autoimmune  
31  
32 liver disease. In contrast, pre-existing hepatitis C or NAFLD often underlie DILI in the DILIN  
33  
34 registry<sup>13</sup>. The difference between this study and the DILIN registry might be associated with the  
35  
36 different spectra of liver diseases, medication systems and socioeconomic backgrounds.  
37  
38 According to a retrospective nationwide analysis, the risk of acute liver injury caused by  
39  
40 suspected agents could increase with pre-existing ALD (aOR 6.46; 95% CI: 4.53-9.21) and NAFLD  
41  
42 (aOR 7.43; 95% CI: 3.30-16.7)<sup>30</sup>. Thus, herbal TCM and its products should be prudently  
43  
44 administered to patients with pre-existing ALD or NAFLD.  
45  
46  
47  
48  
49

50 Interestingly, the biochemistry patterns of HILI patients with pre-existing CLDs were similar  
51  
52 to those of HILI patients, rather than to those of patients with corresponding CLDs. These results  
53  
54 showed that abnormal liver biochemistries were dominated by herbal medications with potential  
55  
56



1  
2  
3 hepatotoxicity in HILI patients, although these HILI patients had pre-existing CLDs. For instance,  
4  
5  
6 HILI patients with pre-existing CLDs and those without pre-existing CLDs could have patterns of  
7  
8 sharply increasing levels of ALT, AST, ALP and TB, while CLD patients could have trends of slightly  
9  
10 elevated levels of these factors. Thus, the diagnosis of HILI is likely to depend on the pattern of  
11  
12 increasing levels of liver biochemistries, especially in patients with pre-existing CLDs. However,  
13  
14 compared with those in HILI patients without pre-existing CLDs, the peak value of serum TB and  
15  
16 the lowest values of serum albumin and cholinesterase were more severe in HILI patients with  
17  
18 pre-existing CLDs, most of whom were diagnosed as having a hepatocellular type of liver injury.  
19  
20 Previous studies and Zimmerman's observations have confirmed that increased bilirubin levels  
21  
22 and hepatocellular liver injury caused by drugs were associated with 10%-50% mortality and liver  
23  
24 transplantation rates from liver failure<sup>31</sup>. More severe hypoalbuminemia and lower choline  
25  
26 esterase activity could be explained by underlying impaired liver function due to reduced  
27  
28 synthesis<sup>32,33</sup>. In a previous study of hepatotoxicity caused by active antiretroviral agents, patients  
29  
30 with acute liver injury owing to these implicated drugs appeared to be more severe in those with  
31  
32 chronic viral hepatitis<sup>34</sup>. Consequently, care should be taken to monitor and manage patients with  
33  
34 pre-existing CLDs who ingest herbal medications by either physician prescription or  
35  
36 self-medication.  
37  
38  
39  
40  
41  
42  
43  
44

45 Although HILI patients with pre-existing CLDs (9.10%) in this study showed similar  
46  
47 liver-related mortality rates as DILI patients with pre-existing CLDs (9.12%) in the DILIN registry,  
48  
49 patients with both pre-existing CLDs and HILI were more likely to develop chronic outcomes  
50  
51 (30.3%) than DILI patients with pre-existing CLDs (13.7%) in the DILIN study<sup>13</sup>. Furthermore, HILI  
52  
53 patients with pre-existing ALD were more likely to have chronic liver diseases than matched ALD  
54  
55  
56  
57  
58  
59  
60

1  
2  
3 patients. In a study of pulmonary TB patients treated with various antituberculosis drugs,  
4  
5  
6 multivariate analysis revealed prior alcohol consumption to be a risk factor for recurrent DILI<sup>35</sup>.  
7  
8 Acute liver injury in individuals with pre-existing CLDs was hypothesized to result in severe liver  
9  
10 injury or slower to recovery due to impaired liver regeneration<sup>3</sup>. Further, it might be inferred that  
11  
12 the interaction of immunopathogenesis between emerging HILI and pre-existing CLDs promoted  
13  
14 the exacerbation of HILI patients with pre-existing CLDs, leading to poor outcomes. It is  
15  
16 reasonable to hypothesize that some herbs with potential hepatotoxicity, such as PMT, perhaps  
17  
18 cause idiosyncratic DILI due to immunopathogenesis and that the active ingredients of herbal  
19  
20 TCM induce immunological idiosyncratic hepatotoxicity by enhancing immune function in  
21  
22 patients<sup>36,37</sup>. Simultaneously, advanced CLDs or even cirrhosis could lead to systematic immune  
23  
24 dysfunction<sup>38,39</sup>. Therefore, patients with pre-existing CLDs following ingestion of herbal TCM  
25  
26 should be considered, with a focus on the increased risk of HILI and its malignant prognosis.  
27  
28  
29  
30  
31

32  
33 In conclusion, HILI patients with pre-existing CLDs should receive heightened attention from  
34  
35 healthcare professionals, pharmaceutical companies, academic institutions and the public owing  
36  
37 to an increased risk of malignant prognosis. Although patients with pre-existing CLDs might  
38  
39 benefit from the use of complementary and alternative medicines (CAM), especially herbal  
40  
41 remedies, they are most likely to experience fatality or chronicity after suffering from HILI caused  
42  
43 by herbal TCM. Consequently, providing strict monitoring and supervision of CAM, including  
44  
45 herbal TCM, in the treatment of patients with pre-existing CLDs is crucial in LMICs. This study  
46  
47 revealed the likelihood of a malignant prognosis in PMT-related HILI in patients with pre-existing  
48  
49 CLDs, but it was limited by potential selection bias because of its small-sample, single-center and  
50  
51 retrospective design. Therefore, further investigation based on multi-center and prospective  
52  
53  
54  
55  
56  
57  
58  
59  
60

1  
2  
3  
4  
5  
6  
7  
8  
9  
10  
11  
12  
13  
14  
15  
16  
17  
18  
19  
20  
21  
22  
23  
24  
25  
26  
27  
28  
29  
30  
31  
32  
33  
34  
35  
36  
37  
38  
39  
40  
41  
42  
43  
44  
45  
46  
47  
48  
49  
50  
51  
52  
53  
54  
55  
56  
57  
58  
59  
60

studies with big data are needed to find the distinctive characteristics, risk factors, predictors, and mechanisms underlying alternative causality and the pathogenesis of all-cause DILI with pre-existing CLDs.

For peer review only

### Acknowledgements

The authors appreciate the contributions of all the subjects and the staff (the doctors, nurses and administrative staff) at Beijing 302 Hospital for this study.

For peer review only

**Footnotes**

Jing Jing and Rui-lin Wang contributed equally.

**Contributors:** Jia-bo Wang, Xiao-he Xiao and Jing Jing designed the report. Jing Jing, Rui-lin Wang, Yun Zhu, Ming Niu, Li-fu Wang, Xue-ai Song, Ting-ting He, Yong-qiang Sun, Fan Zhang, Wen-tao Xu and Si-miao Yu collected the patient's clinical data; Jing Jing, Yu-ming Guo, Zhao-fang Bai analyzed the data. Jing Jing and Rui-lin Wang translated and wrote the paper. Xiao-he Xiao and Jia-bo Wang took charge of the project and amended the paper. All authors read and approved the final version of manuscript.

**Funding:** This work was supported by the National Key Technology R&D Program (no. 2015ZX09501-004-001-008 and 2015ZX09501004-001-002), the National TCM Industry Science and Technology Program (no. 201507004-04), the National Natural Science Foundation of China (nos. 81373984 and 81403126) and Beijing Natural Science Foundation (no. 7152142).

**Conflict-of-interest statement:** Jing Jing, Rui-lin Wang, Yun Zhu, Ming Niu, Li-fu Wang, Xue-ai Song, Ting-ting He, Yong-qiang Sun, Fan Zhang, Wen-tao Xu, Si-miao Yu, Yu-ming Guo, Zhao-fang Bai, Xiao-he Xiao and Jia-bo Wang declare that they have no competing interests for publication.

**Patient consent:** Obtained.

**Ethics approval:** The ethics committee of Beijing 302 Hospital approved this study (No: 2017056D).

**Data sharing statement:** No additional data are available.

## Reference

1. Zimmerman HJ. Hepatotoxicity. The adverse effects of drugs and other chemicals on the liver. Second Edition. Philadelphia (PA): Lippincott, Williams and Wilkins; 1999: 430.
2. O'Dell JR, Zetterman RK, Burnett DA. Centrilobular hepatic fibrosis following acetaminophen-induced hepatic necrosis in an alcoholic. *Jama* 1986;255(19):2636-2637.
3. Chalasani NP, Hayashi PH, Bonkovsky HL, et al. ACG Clinical Guideline: the diagnosis and management of idiosyncratic drug-induced liver injury. *Am J Gastroenterol* 2014;109(7):950-966; quiz 967.
4. Fromenty B. Drug-induced liver injury in obesity. *J Hepatol* 2013;58(4):824-826.
5. Michaut A, Moreau C, Robin M-A, et al. Acetaminophen-induced liver injury in obesity and nonalcoholic fatty liver disease. *Liver International*. 2014;34(7):e171-e179.
6. Fontana RJ, Hayashi PH, Gu J, et al. Idiosyncratic drug-induced liver injury is associated with substantial morbidity and mortality within 6 months from onset. *Gastroenterology* 2014;147(1):96-108.e104.
7. Navarro V, Khan I, Bjornsson E, et al. Liver injury from herbal and dietary supplements. *Hepatology* 2017;65(1):363-373.
8. Liu T, Li X, Zou ZY, et al. The prevalence and determinants of using Traditional Chinese Medicine among middle-aged and older Chinese adults: Results from the China Health and Retirement Longitudinal Study. *J Am Med Dir Assoc* 2015;16(11):1002.e1-5.
9. L.M.Hsu, Y.S.Huang, S.H.Tsay, et al. Acute hepatitis induced by Chinese hepatoprotective herb, Xiao-Chai-Hu-Tang. *J Chin Med Assoc* 2006;69(2):86-88.

- 1  
2  
3  
4 10. Teschke R, Eickhoff A. Herbal hepatotoxicity in traditional and modern medicine: Actual key  
5  
6  
7 issues and new encouraging steps. *Front Pharmacol*. 2015;6:72.  
8
- 9 11. Zhu Y, Niu M, Chen J, et al. Comparison between Chinese Herbal Medicine and Western  
10  
11 Medicine-induced liver injury of 1985 patients. *J Gastroenterol Hepatol* 2016;31:1476-1482.  
12
- 13 12. Jung KA, Min HJ, Yoo SS, et al. Drug-induced liver injury: Twenty five cases of acute hepatitis  
14  
15 following ingestion of *Polygonum multiflorum* Thunb. *Gut Liver* 2011;5(4):493-499.  
16  
17
- 18 13. Chalasani N, Bonkovsky HL, Fontana R, et al. Features and outcomes of 899 patients with  
19  
20 drug-induced liver injury: The DILIN prospective study. *Gastroenterology*  
21  
22 2015;148(7):1340-1352.e1347.  
23  
24
- 25 14. Aithal G, Watkins P, Andrade R, et al. Case definition and phenotype standardization in  
26  
27 drug-induced liver injury. *Clin Pharmacol Ther* 2011;89(6):806-815.  
28  
29
- 30 15. Chalasani N, Regev A. Drug-induced liver injury in patients with preexisting chronic liver  
31  
32 disease in drug development: How to identify and manage? *Gastroenterology*.  
33  
34 2016;151(6):1046-1051.  
35  
36
- 37 16. Teschke R, Danan G. Diagnosis and management of drug-induced liver injury (DILI) in patients  
38  
39 with pre-existing liver disease. *Drug Saf* 2016;39(9):801-821.  
40  
41
- 42 17. O'Shea RS, Dasarathy S, McCullough AJ. Alcoholic liver disease. *Am J Gastroenterol*  
43  
44 2010;105(1):14-32; quiz 33.  
45  
46
- 47 18. Chalasani N, Younossi Z, Lavine JE, et al. The diagnosis and management of non-alcoholic fatty  
48  
49 liver disease: practice guideline by the American Gastroenterological Association, American  
50  
51 Association for the Study of Liver Diseases, and American College of Gastroenterology.  
52  
53  
54  
55

- 1  
2  
3  
4 *Gastroenterology* 2012;142(7):1592-1609.  
5  
6  
7 19. European Association for the Study of the Liver. EASL 2017 clinical practice guidelines on the  
8  
9 management of hepatitis B virus infection. *J Hepatol* 2017;67(2):370-398.  
10  
11 20. Kanwal F, Bacon BR, Beste LA, et al. Hepatitis C virus infection care pathway-A report from the  
12  
13 American Gastroenterological Association Institute HCV Care Pathway Work Group.  
14  
15 *Gastroenterology* 2017;152(6):1588-1598.  
16  
17  
18 21. European Association for the Study of the Liver. EASL clinical practice guidelines: Autoimmune  
19  
20 hepatitis. *J Hepatol* 2015;63(4):971-1004.  
21  
22  
23 22. European Association for the Study of the Liver. EASL clinical practice guidelines: Management  
24  
25 of cholestatic liver diseases. *J Hepatol* 2009;51(2):237-267.  
26  
27  
28 23. Bénichou C. Criteria of drug-induced liver disorders. Report of an international consensus  
29  
30 meeting. *J Hepatol* 1990;11(2):272-276.  
31  
32  
33 24. Danan G, Teschke R. RUCAM in drug and herb induced liver injury: The update. *Int J Mol Sci*  
34  
35 2015;17(1):1-33.  
36  
37  
38 25. Yu YC, Mao YM, Chen CW, et al. CSH guidelines for the diagnosis and treatment of  
39  
40 drug-induced liver injury. *Hepatol Int* 2017;11(3):221-241.  
41  
42  
43 26. Wang JB, Zhu Y, Bai ZF, et al. Guidelines for the diagnosis and management of herb-induced  
44  
45 liver injury. *Chin J Integr Med* 2018;15. doi: 10.1007/s11655-018-3000-8.  
46  
47  
48 27. Olsson S, Pal SN, Dodoo A. Pharmacovigilance in resource-limited countries. *Expert Rev Clin*  
49  
50 *Pharmacol* 2015;8(4):449-460.  
51  
52  
53 28. Xiao XH, Li XH, Zhu Y, et al. Guideline for diagnosis and treatment of herb-induced liver injury.  
54  
55



- 1  
2  
3  
4 *Zhonghua Gan Zang Bing Za Zhi* 2016; 32: 835-43. (In Chinese.)  
5  
6  
7 29. Navarro VJ, Khan I, Bjornsson E, et al. Liver injury from herbal and dietary supplements.  
8  
9 *Hepatology* 2017;65(1):363-373.  
10  
11 30. Nguyen GC, Sam J, Thuluvath PJ. Hepatitis C is a predictor of acute liver injury among  
12  
13 hospitalizations for acetaminophen overdose in the United States: a nationwide analysis.  
14  
15 *Hepatology* 2008;48(4):1336-1341.  
16  
17 31. Robles-Diaz M, Lucena MI, Kaplowitz N, et al. Use of Hy's law and a new composite algorithm  
18  
19 to predict acute liver failure in patients with drug-induced liver injury. *Gastroenterology*.  
20  
21 2014;147(1):109-118 e105.  
22  
23 32. Gatta A, Verardo A, Bolognesi M. Hypoalbuminemia. *Intern Emerg Med* 2012;7 Suppl  
24  
25 3:S193-199.  
26  
27 33. Eisenbach C, Sieg O, Stremmel W, et al. Diagnostic criteria for acute liver failure due to Wilson  
28  
29 disease. *World J Gastroenterol* 2007;13(11):1711-1714.  
30  
31 34. Nunez M. Clinical syndromes and consequences of antiretroviral-related hepatotoxicity.  
32  
33 *Hepatology* 2010;52(3):1143-1155.  
34  
35 35. Teschke R, Danan G. Drug-induced liver injury: Is chronic liver disease a risk factor and a  
36  
37 clinical issue? *Expert Opin Drug Metab Toxicol* 2017;13(4):425-438.  
38  
39 36. Bai XF, Gao Y, Zuo XB, et al. Progress in research on the pathogenesis of immune regulation  
40  
41 and idiosyncratic drug-induced liver injury. *Acta Pharmaceutica Sini* 2017; 52 (7): 1019–1026.  
42  
43 37. Meng YK, Li CY, Li RY, et al. *Cis-stilbene* glucoside in *Polygonum multiflorum* induces  
44  
45 immunological idiosyncratic hepatotoxicity in LPS-treated rats by suppressing PPAR-gamma.  
46  
47  
48  
49  
50  
51  
52  
53  
54  
55  
56  
57  
58  
59  
60

1  
2  
3  
4 *Acta Pharmacol Sin* 2017;38(10):1340-1352.  
5

6 38. Jenne CN, Kubes P. Immune surveillance by the liver. *Nat Immunol* 2013;14(10):996-1006.  
7

8  
9 39. Heymann F, Peusquens J, Ludwig-Portugall I, et al. Liver inflammation abrogates  
10 immunological tolerance induced by Kupffer cells. *Hepatology* 2015;62(1):279-291.  
11  
12  
13  
14  
15  
16  
17  
18  
19  
20  
21  
22  
23  
24  
25  
26  
27  
28  
29  
30  
31  
32  
33  
34  
35  
36  
37  
38  
39  
40  
41  
42  
43  
44  
45  
46  
47  
48  
49  
50  
51  
52  
53  
54  
55  
56  
57  
58  
59  
60

For peer review only

Table 1. The characteristics among HILI patients with or without pre-existing CLDs.

| Characteristic                              | Entire cohort of HILI<br>(n=145, 100%) | HILI with pre-existing CLDs<br>(n=33, 22.76%) | HILI without CLD<br>(n=112, 77.24%) | <i>p</i><br>value |
|---------------------------------------------|----------------------------------------|-----------------------------------------------|-------------------------------------|-------------------|
| Males (%)                                   | 67 (46.2%)                             | 22 (66.7%)                                    | 45 (40.2%)                          | 0.007             |
| Age (years, mean±SD)                        | 43.29±13.68                            | 45.60±13.04                                   | 42.61±13.85                         | 0.272             |
| BMI (kg/m <sup>2</sup> , mean±SD)           | 23.37±3.40                             | 24.64±3.57                                    | 23.00±3.27                          | 0.015             |
| Prior drug allergies (%)                    | 11(7.6%)                               | 1(3.0%)                                       | 10(8.9%)                            | 0.236             |
| Latency (days, median [IQR])                | 50.0(31.0,91.0)                        | 45.0(29.5,105.0)                              | 51.0(31.0,88.5)                     | 0.777             |
| Re-challenge (%)                            | 7(4.8%)                                | 1(3.0%)                                       | 6(5.4%)                             | 0.499             |
| Alcohol use <sup>†</sup> (%)                | 28(19.3%)                              | 17(51.5%)                                     | 11(9.8%)                            | <0.001            |
| <b>Laboratory index in DILI recognition</b> |                                        |                                               |                                     |                   |
| WBC (×10 <sup>9</sup> /L, median [IQR])     | 5.34(4.30, 6.56)                       | 4.89(4.39,6.50)                               | 5.37(4.23,6.56)                     | 0.899             |
| HGB (g/L, mean±SD)                          | 135.59±18.20                           | 137.82±18.72                                  | 134.94±18.08                        | 0.426             |

|                                                           |                         |                         |                         |       |
|-----------------------------------------------------------|-------------------------|-------------------------|-------------------------|-------|
| PLT ( $\times 10^9/L$ , mean $\pm$ SD)                    | 213.47 $\pm$ 71.00      | 196.79 $\pm$ 78.72      | 218.37 $\pm$ 68.16      | 0.125 |
| Peripheral eosinophilia ( $\times 10^9/L$ , median [IQR]) | 0.16(0.10,0.28)         | 0.21(0.14,0.28)         | 0.15(0.09,0.28)         | 0.114 |
| <b>Peak values of laboratory index</b>                    |                         |                         |                         |       |
| ALT (U/L, median [IQR])                                   | 1208.70(826.05,1537.00) | 1276.00(806.00,1671.00) | 1173.00(833.00,1472.05) | 0.551 |
| AST (U/L, median [IQR])                                   | 739.00(494.00,1051.00)  | 873.00(445.00,1292.50)  | 716.90(493.50,1041.60)  | 0.341 |
| ALP (U/L, median [IQR])                                   | 179.0(141.5,215.0)      | 177.00(145.50,230.55)   | 180.00(139.50,213.50)   | 0.786 |
| TB (mg/dL, median [IQR])                                  | 10.76(6.15,18.96)       | 18.75(7.69,25.18)       | 10.38(5.59,16.77)       | 0.008 |
| Albumin (g/L, median [IQR])                               | 34(31,38)               | 33.00(27.50,37.00)      | 35.00(32.00,38.00)      | 0.036 |
| Cholinesterase (U/L, mean $\pm$ SD)                       | 4924.61 $\pm$ 1772.28   | 4197.70 $\pm$ 1969.99   | 5138.79 $\pm$ 1659.09   | 0.007 |
| INR (median [IQR])                                        | 1.07(0.98,1.02)         | 1.09(0.97,1.40)         | 1.07(0.99,1.15)         | 0.488 |
| <b>Pattern of liver injury</b>                            |                         |                         |                         |       |
| HC/Chol/Mixed (%)                                         | 137/4/4                 | 30/2/1                  | 107/2/3                 | 0.399 |

|                                                      |            |           |           |       |
|------------------------------------------------------|------------|-----------|-----------|-------|
| RUCAM score (median [IQR])                           | 8(7,8)     | 7(6,8)    | 7(7,8)    | 0.003 |
| Possible/probable/highly probable                    | 9/120/16   | 2/30/1    | 7/90/15   | 0.275 |
| <b>Severity of Liver Injury† (% of column total)</b> |            |           |           | 0.120 |
| Mild                                                 | 8(5.5%)    | 1(3.0%)   | 7(6.3%)   |       |
| Moderate                                             | 18(12.4%)  | 2(6.1%)   | 16(14.3%) |       |
| Severe                                               | 105(72.4%) | 25(75.8%) | 80(71.4%) |       |
| Liver failure                                        | 10(6.9%)   | 2(6.1%)   | 8(7.1%)   |       |
| Fatal                                                | 4(2.8%)    | 3(9.1%)   | 1(0.9%)   |       |
| MELD score (median [IQR])                            | 15(12,18)  | 17(13,20) | 15(11,17) | 0.038 |
| <b>Prognosis (% of column total)</b>                 |            |           |           |       |
| Recovery                                             | 120(82.8%) | 20(60.6%) | 97(86.6%) | 0.001 |
| Chronic                                              | 20(13.8%)  | 10(30.3%) | 14(12.5%) | 0.016 |

|       |         |         |         |       |
|-------|---------|---------|---------|-------|
| Fatal | 5(3.4%) | 3(9.1%) | 1(0.9%) | 0.037 |
|-------|---------|---------|---------|-------|

† The patients with histories of alcoholism (alcohol intake of >2 drinks per day in women and >3 drinks per day in men) did not drink during the month prior to the onset of liver injury.

‡ The severity assessments of HILI were graded as follows<sup>31,32</sup>: mild, reversible elevations of serum ALT and/or ALP levels, TB <2.5 mg/dl and international normalized ratio (INR) <1.5; moderate elevations of serum ALT and/or ALP levels with associated TB ≥2.5 mg/dl or INR ≥1.5; severe, elevations of serum ALT and/or ALP levels and TB ≥5 mg/dl, with or without INR ≥1.5; liver failure, elevation of serum ALT and/or ALP level with TB ≥10 mg/dl or a sharp increase of 1 mg/dl per day, INR ≥1.5, with relevant ascites, hepatic encephalopathy or other organ failure related to DILI; death or liver transplantation because of DILI.

Abbreviations: ALP, serum alkaline phosphatase; ALT, serum alanine transaminase; AST, serum aspartate aminotransferase; BMI, body mass index; Chol, cholestatic; CLD, chronic liver diseases; DILI, drug-induced liver injury; HC, hepatocellular; HGB, hemoglobin; HILI, herb induced liver injury; INR, international normalized ratio; IQR, interquartile range (25-75%); MELD, Model for End-Stage Liver Disease; PLT, platelet; RUCAM, the Roussel Uclaf Causality Assessment Method; SD, standard deviation; TB, serum total bilirubin; WBC, white blood cell

1  
2  
3  
4  
5  
6  
7  
8  
9  
10  
11  
12  
13  
14  
15  
16  
17  
18  
19  
20  
21  
22  
23  
24  
25  
26  
27  
28  
29  
30  
31  
32  
33  
34  
35  
36  
37  
38  
39  
40  
41  
42  
43  
44  
45  
46  
47

**Table 2** The characteristics of HILI patients with pre-existing ALD compared to those of HILI and ALD patients.

| Characteristic                         | HILI group<br>(n=112)   | HILI with pre-existing ALD<br>group<br>(n=17) | Matched ALD group<br>( n=136 ) | <i>p</i><br>value* | <i>p</i><br>value** | <i>p</i><br>value*** | <i>p</i><br>value**** |
|----------------------------------------|-------------------------|-----------------------------------------------|--------------------------------|--------------------|---------------------|----------------------|-----------------------|
| Males (%)                              | 45(40.2%)               | 15(88.2%)                                     | 120(88.2%)                     | <0.001             | <0.001              | <0.001               | 1.00                  |
| Age (years, median [IQR])              | 43.79(33.80, 53.41)     | 45.15(38.68, 56.00)                           | 45.17(38.34, 51.65)            | 0.567              |                     |                      |                       |
| BMI (kg/m <sup>2</sup> , median [IQR]) | 22.48(20.45, 24.96)     | 24.06(20.67, 26.76)                           | 23.51(22.10, 24.73)            | 0.133              |                     |                      |                       |
| Liver cirrhosis (%)                    | 8(7.1%)                 | 3(17.6%)                                      | 32(23.5%)                      | 0.001              | 0.480               | <0.001               | 1.00                  |
| Peak of serum ALT (U/L, median [IQR])  | 1173.00(833.00,1472.05) | 1389.00(911.85,1842.50)                       | 54.50(30.00, 90.75)            | <0.001             | 0.801               | <0.001               | <0.001                |
| Peak of serum AST (U/L, median [IQR])  | 716.90(493.50,1041.60)  | 878.00(423.50,1359.00)                        | 46.50(26.00, 91.00)            | <0.001             | 1.00                | <0.001               | <0.001                |

| Characteristic                          | HILI group<br>(n=112) | HILI with pre-existing ALD<br>group<br>(n=17) | Matched ALD group<br>( n=136 ) | <i>p</i><br>value * | <i>p</i><br>value ** | <i>p</i><br>value *** | <i>p</i><br>value **** |
|-----------------------------------------|-----------------------|-----------------------------------------------|--------------------------------|---------------------|----------------------|-----------------------|------------------------|
| Peak of serum ALP (U/L, median [IQR])   | 180.00(139.50,213.50) | 179.00(149.50,230.55)                         | 103.00(80.00, 165.50)          | <0.001              | 1.00                 | <0.001                | 0.003                  |
| Peak of serum TB (mg/dL, median [IQR])  | 10.38(5.59, 16.77)    | 18.75(8.15,29.51)                             | 1.11(0.74, 2.12)               | <0.001              | 0.057                | <0.001                | <0.001                 |
| Peak of serum GGT (U/L, median [IQR])   | 164.00(96.25, 260.00) | 160.00(113.00, 187.00)                        | 125.00(46.75, 336.00)          | 0.508               |                      |                       |                        |
| Peak of serum INR (median [IQR])        | 1.07(0.99, 1.15)      | 1.11(1.02, 1.40)                              | 0.99(0.93, 1.10)               | <0.001              | 0.744                | <0.001                | 0.009                  |
| Peak of serum TC (mmol/L, median [IQR]) | 3.79(2.96, 4.42)      | 3.78(2.45, 4.44)                              | 4.75(3.90, 5.43)               | <0.001              | 0.957                | <0.001                | 0.009                  |



1  
2  
3  
4  
5  
6  
7  
8  
9  
10  
11  
12  
13  
14  
15  
16  
17  
18  
19  
20  
21  
22  
23  
24  
25  
26  
27  
28  
29  
30  
31  
32  
33  
34  
35  
36  
37  
38  
39  
40  
41  
42  
43  
44  
45  
46  
47

| Characteristic                             | HILI group<br>(n=112)    | HILI with pre-existing ALD<br>group<br>(n=17) | Matched ALD group<br>( n=136 ) | <i>p</i><br>value * | <i>p</i><br>value ** | <i>p</i><br>value *** | <i>p</i><br>value **** |
|--------------------------------------------|--------------------------|-----------------------------------------------|--------------------------------|---------------------|----------------------|-----------------------|------------------------|
| Peak of serum TG (mmol/L, median [IQR])    | 2.32(1.61, 3.25)         | 2.34(1.77, 3.56)                              | 1.70(1.10, 3.01)               | 0.004               | 1.00                 | 0.009                 | 0.156                  |
| <b>Laboratory index in the recognition</b> |                          |                                               |                                |                     |                      |                       |                        |
| Serum albumin (g/L, median [IQR])          | 37.00(35.00, 40.00)      | 35.00(30.50, 39.00)                           | 39.00(35.00, 43.00)            | 0.001               | 0.303                | 0.003                 | 0.021                  |
| Serum cholinesterase (U/L, median [IQR])   | 5754.50(4715.25,6615.75) | 4506.00(3196.50,5561.00)                      | 6702.00(4861.50,8223.75)       | <0.001              | 0.018                | <0.001                | <0.001                 |
| Recovery (%)                               | 97(86.6%)                | 10(58.8%)                                     | 120(88.2%)                     | 0.011               | 0.030                | 1.000                 | 0.015                  |
| Chronic (%)                                | 14(12.5%)                | 6(35.3%)                                      | 16(11.8%)                      | 0.038               | 0.027                | 0.860                 | 0.019                  |
| Fatal (%)                                  | 1(0.9%)                  | 1(5.9%)                                       | 0(0.0%)                        | 0.058               |                      |                       |                        |

31

1  
2  
3  
4  
5  
6  
7 \* The comparisons were analyzed among the 3 groups, including the DILI group, DILI with pre-existing ALD group and matched ALD group.

8  
9 \*\* The comparisons were analyzed between the DILI group and the DILI with pre-existing ALD group.

10  
11 \*\*\* The comparisons were analyzed between the DILI group and the matched ALD group.

12  
13 \*\*\*\* The comparisons were analyzed between the DILI with pre-existing ALD group and the matched ALD group.

14  
15  
16 Abbreviations: ALD, alcoholic liver disease; ALP, serum alkaline phosphatase; ALT, serum alanine transaminase; AST, serum aspartate  
17  
18 aminotransferase; BMI, body mass index; GGT, gamma-glutamyl transpeptidase; HILI, herb-induced liver injury; Ig, immunoglobulin; INR,  
19  
20 international normalized ratio; IQR, interquartile range (25-75%); SD, standard deviation; TB, serum total bilirubin; TC: total cholesterol; TG:  
21  
22 total glyceride  
23  
24  
25  
26  
27  
28  
29  
30  
31  
32  
33  
34  
35  
36  
37  
38  
39  
40  
41  
42  
43  
44  
45  
46  
47

1  
2  
3  
4  
5  
6  
7  
8  
9  
10  
11  
12  
13  
14  
15  
16  
17  
18  
19  
20  
21  
22  
23  
24  
25  
26  
27  
28  
29  
30  
31  
32  
33  
34  
35  
36  
37  
38  
39  
40  
41  
42  
43  
44  
45  
46  
47

**Table 3** The characteristics of HILI patients with pre-existing NAFLD compared with those of HILI patients and NAFLD patients.

| Characteristic                           | HILI group<br>(n=112)   | HILI with pre-existing NAFLD<br>group<br>(n=8) | Matched NAFLD<br>group<br>( n=64 ) | <i>p</i><br>value* | <i>p</i><br>value** | <i>p</i><br>value*** | <i>p</i><br>value**** |
|------------------------------------------|-------------------------|------------------------------------------------|------------------------------------|--------------------|---------------------|----------------------|-----------------------|
| Males (%)                                | 45(40.2%)               | 4(50.0%)                                       | 24(37.5%)                          | 0.805              |                     |                      |                       |
| Age (years, median [IQR])                | 43.79(33.80,53.41)      | 40.27(33.81,48.39)                             | 39.17(34.08,48.69)                 | 0.337              |                     |                      |                       |
| BMI (kg/m <sup>2</sup> , median [IQR])   | 22.48(20.45,24.96)      | 27.16(25.48,28.53)                             | 26.15(23.69,28.53)                 | <0.001             | 0.003               | <0.001               | 1.000                 |
| Diabetes mellitus (%)                    | 5(4.5%)                 | 0(0.0%)                                        | 4(6.3%)                            | 0.817              |                     |                      |                       |
| Liver cirrhosis (%)                      | 8(6.90%)                | 0(0.00%)                                       | 0(0.00%)                           | 0.104              |                     |                      |                       |
| Complications (%)                        | 17(14.3%)               | 2(25.0%)                                       | 0(0.0%)                            | 0.001              | 1.000               | <0.001               | 0.009                 |
| Peak of serum ALT (U/L,<br>median [IQR]) | 1173.00(833.00,1472.05) | 1490.50(861.75,1681.50)                        | 88.00(58.50,152.25)                | <0.001             | 1.000               | <0.001               | <0.001                |

| Characteristic                            | HILI group<br>(n=112)  | HILI with pre-existing NAFLD<br>group<br>(n=8) | Matched NAFLD<br>group<br>( n=64 ) | <i>p</i><br>value* | <i>p</i><br>value** | <i>p</i><br>value*** | <i>p</i><br>value**** |
|-------------------------------------------|------------------------|------------------------------------------------|------------------------------------|--------------------|---------------------|----------------------|-----------------------|
| Peak of serum AST (U/L,<br>median [IQR])  | 716.90(493.50,1041.60) | 945.00(645.18,1377.75)                         | 50.00(34.00, 75.25)                | <0.001             | 0.468               | <0.001               | <0.001                |
| Peak of serum ALP (U/L,<br>median [IQR])  | 180.00(139.50,213.50)  | 149.00(105.25,192.75)                          | 98.50(77.50,121.75)                | <0.001             | 0.864               | <0.001               | 0.045                 |
| Peak of serum TB (mg/dL,<br>median [IQR]) | 10.38(5.59,16.77)      | 21.08(7.65,21.93)                              | 0.74(0.57,0.90)                    | <0.001             | 0.252               | <0.001               | <0.001                |
| Peak of serum GGT (U/L,<br>median [IQR])  | 164.00(96.25,260.00)   | 209.00(196.25,257.25)                          | 80.00(40.50,141.75)                | <0.001             | 0.396               | <0.001               | <0.001                |
| Peak of serum INR (median<br>[IQR])       | 1.07(0.99,1.15)        | 1.21(0.97,1.40)                                | 0.94(0.88, 0.96)                   | <0.001             | 1.000               | <0.001               | 0.003                 |

| Characteristic                                 | HILI group<br>(n=112) | HILI with pre-existing NAFLD<br>group<br>(n=8) | Matched NAFLD<br>group<br>( n=64 ) | <i>p</i><br>value* | <i>p</i><br>value** | <i>p</i><br>value*** | <i>p</i><br>value**** |
|------------------------------------------------|-----------------------|------------------------------------------------|------------------------------------|--------------------|---------------------|----------------------|-----------------------|
| Peak of serum TC (mmol/L,<br>median [IQR])     | 3.79(2.96,4.42)       | 4.18(3.76, 4.63)                               | 5.04(4.39, 5.58)                   | <0.001             | 0.780               | <0.001               | 0.084                 |
| Peak of serum TG (mmol/L,<br>median [IQR])     | 2.32(1.61,3.25)       | 3.11(1.71,4.37)                                | 2.24(1.58,3.37)                    | 0.530              | 0.711               | 1.000                | 1.000                 |
| <b>Laboratory index in the<br/>recognition</b> |                       |                                                |                                    |                    |                     |                      |                       |
| Serum albumin (g/L,<br>median [IQR])           | 37.00(35.00,40.00)    | 39.50(33.25,40.00)                             | 42.00(40.00,44.00)                 | <0.001             | 1.000               | <0.001               | 0.003                 |
| Serum cholinesterase (U/L,<br>mean±SD)         | 5664.79±1613.11       | 5856.38±1941.11                                | 8589.23±1254.07                    | <0.001             | 1.000               | <0.001               | <0.001                |

| Characteristic | HILI group<br>(n=112) | HILI with pre-existing NAFLD<br>group<br>(n=8) | Matched NAFLD<br>group<br>( n=64 ) | <i>p</i><br>value* | <i>p</i><br>value** | <i>p</i><br>value*** | <i>p</i><br>value**** |
|----------------|-----------------------|------------------------------------------------|------------------------------------|--------------------|---------------------|----------------------|-----------------------|
| Recovery (%)   | 97(86.6%)             | 5(62.5%)                                       | 55(85.9%)                          | 0.187              |                     |                      |                       |
| Chronic (%)    | 14(12.5%)             | 3(37.5%)                                       | 9(14.1%)                           | 0.137              |                     |                      |                       |
| Fatal (%)      | 1(0.9%)               | 0(0.00%)                                       | 0(0.00%)                           | 1.000              |                     |                      |                       |

\* The comparisons were analyzed among the 3 groups, including the DILI group, DILI with pre-existing NAFLD group and matched NAFLD group.

\*\* The comparisons were analyzed between the DILI group and the DILI with pre-existing NAFLD group.

\*\*\* The comparisons were analyzed between the DILI group and the matched NAFLD group.

\*\*\*\* The comparisons were analyzed between the DILI with pre-existing NAFLD group and the matched NAFLD group.

Abbreviations: ALP, serum alkaline phosphatase; ALT, serum alanine transaminase; AST, serum aspartate aminotransferase; BMI, body mass index; GGT, gamma-glutamyl transpeptidase; HILI, herb-induced liver injury; Ig, immunoglobulin; INR, international normalized ratio; IQR, interquartile range (25-75%); NAFLD, non-alcoholic fatty liver disease; SD, standard deviation; TB, serum total bilirubin; TC: total cholesterol; TG:

1  
2  
3  
4  
5  
6  
7  
8  
9  
10  
11  
12  
13  
14  
15  
16  
17  
18  
19  
20  
21  
22  
23  
24  
25  
26  
27  
28  
29  
30  
31  
32  
33  
34  
35  
36  
37  
38  
39  
40  
41  
42  
43  
44  
45  
46  
47

total glyceride

For peer review only

**Table 4** Logistic regression for the prognosis of HILI with/without pre-existing CLDs caused by herbal TCM.

| Parameters <sup>‡</sup>         | Univariable |              |                   | Multivariate <sup>†</sup> |              |                   |
|---------------------------------|-------------|--------------|-------------------|---------------------------|--------------|-------------------|
|                                 | OR          | 95%CI        | <i>p</i><br>value | OR                        | 95%CI        | <i>p</i><br>value |
| <b>Non-recovery<sup>§</sup></b> |             |              |                   |                           |              |                   |
| Age                             | 1.028       | 0.996 1.061  | 0.089             | 1.021                     | 0.985 1.058  | 0.265             |
| Sex                             | 0.828       | 0.363 1.890  | 0.654             | 0.819                     | 0.300 2.236  | 0.696             |
| BMI                             | 1.143       | 1.010 1.294  | 0.034             |                           |              |                   |
| Pre-existing                    | 4.203       | 1.735 10.185 | 0.001             | 3.966                     | 1.501 10.477 | 0.005             |
| <b>CLDs</b>                     |             |              |                   |                           |              |                   |
| Peak value of                   | 0.999       | 0.998 1.000  | 0.031             | 0.999                     | 0.998 1.000  | 0.022             |
| <b>ALT</b>                      |             |              |                   |                           |              |                   |
| Peak value of                   | 1.052       | 1.005 1.101  | 0.028             |                           |              |                   |
| <b>total bilirubin</b>          |             |              |                   |                           |              |                   |
| Peak value of                   | 7.708       | 1.986 29.923 | 0.003             |                           |              |                   |
| <b>INR</b>                      |             |              |                   |                           |              |                   |
| Lowest                          | 0.804       | 0.726 0.890  | <0.001            |                           |              |                   |
| <b>albumin</b>                  |             |              |                   |                           |              |                   |
| Lowest                          | 0.999       | 0.999 1.000  | <0.001            |                           |              |                   |
| <b>Cholinesterase</b>           |             |              |                   |                           |              |                   |



|                 |       |       |       |       |       |       |       |       |
|-----------------|-------|-------|-------|-------|-------|-------|-------|-------|
| MELD score      | 1.068 | 0.988 | 1.154 | 0.096 | 1.077 | 0.989 | 1.172 | 0.087 |
| <b>Chronic</b>  |       |       |       |       |       |       |       |       |
| Age             | 1.023 | 0.990 | 1.058 | 0.175 | 1.014 | 0.977 | 1.052 | 0.465 |
| Sex             | 1.018 | 0.423 | 2.452 | 0.968 | 0.970 | 0.348 | 2.707 | 0.954 |
| BMI             | 1.146 | 1.006 | 1.306 | 0.040 |       |       |       |       |
| Pre-existing    | 3.043 | 1.201 | 7.713 | 0.019 | 3.035 | 1.115 | 8.259 | 0.030 |
| CLDs            |       |       |       |       |       |       |       |       |
| Peak value of   | 0.999 | 0.998 | 1.000 | 0.078 | 0.999 | 0.998 | 1.000 | 0.102 |
| ALT             |       |       |       |       |       |       |       |       |
| Peak value of   | 1.025 | 0.976 | 1.075 | 0.323 |       |       |       |       |
| total bilirubin |       |       |       |       |       |       |       |       |
| Peak value of   | 2.596 | 0.858 | 7.855 | 0.091 |       |       |       |       |
| INR             |       |       |       |       |       |       |       |       |
| Lowest          | 0.879 | 0.802 | 0.964 | 0.006 |       |       |       |       |
| albumin         |       |       |       |       |       |       |       |       |
| Lowest          | 1.000 | 0.999 | 1.000 | 0.010 |       |       |       |       |
| Cholinesterase  |       |       |       |       |       |       |       |       |
| MELD score      | 1.015 | 0.936 | 1.100 | 0.727 | 1.017 | 0.933 | 1.109 | 0.703 |
| <b>Fatality</b> |       |       |       |       |       |       |       |       |
| Age             | 1.042 | 0.965 | 1.124 | 0.293 | 1.028 | 0.960 | 1.101 | 0.433 |
| Sex             | 0.277 | 0.028 | 2.729 | 0.271 | 0.512 | 0.085 | 3.076 | 0.465 |

|                 |        |       |         |       |       |       |        |       |
|-----------------|--------|-------|---------|-------|-------|-------|--------|-------|
| BMI             | 1.071  | 0.804 | 1.426   | 0.640 |       |       |        |       |
| Pre-existing    | 11.100 | 1.114 | 110.584 | 0.040 | 4.385 | 0.846 | 22.714 | 0.078 |
| CLDs            |        |       |         |       |       |       |        |       |
| Peak value of   | 0.999  | 0.997 | 1.001   | 0.212 | 0.999 | 0.997 | 1.000  | 0.169 |
| ALT             |        |       |         |       |       |       |        |       |
| Peak value of   | 1.169  | 1.039 | 1.316   | 0.010 |       |       |        |       |
| total bilirubin |        |       |         |       |       |       |        |       |
| Peak value of   | 12.448 | 2.429 | 63.779  | 0.002 |       |       |        |       |
| INR             |        |       |         |       |       |       |        |       |
| Lowest          | 0.545  | 0.328 | 0.904   | 0.019 |       |       |        |       |
| albumin         |        |       |         |       |       |       |        |       |
| Lowest          | 0.997  | 0.996 | 0.999   | 0.008 |       |       |        |       |
| Cholinesterase  |        |       |         |       |       |       |        |       |
| MELD score      | 1.326  | 1.088 | 1.616   | 0.005 | 1.222 | 1.052 | 1.421  | 0.009 |

† Peak value of total bilirubin, INR and lowest serum albumin and cholinesterase were excluded for multivariate analysis.

‡ Choosing clinically relevant variables (age and sex) and those with  $p < 0.1$  on univariate analysis. For variables with known co-linearity or high correlations, clinical judgment was used to select one predictor for additional modeling.

§ Non-recovery outcomes involving chronic and fatal outcomes

Abbreviations: ALT, serum alanine transaminase; BMI, body mass index; CLD, chronic liver

1  
2  
3  
4  
5  
6  
7  
8  
9  
10  
11  
12  
13  
14  
15  
16  
17  
18  
19  
20  
21  
22  
23  
24  
25  
26  
27  
28  
29  
30  
31  
32  
33  
34  
35  
36  
37  
38  
39  
40  
41  
42  
43  
44  
45  
46  
47  
48  
49  
50  
51  
52  
53  
54  
55  
56  
57  
58  
59  
60

diseases; HILI, herb-induced liver injury; INR, international normalized ratio; MELD, Model for  
End-Stage Liver Disease; OR, odds ratio; CI, confidence interval; TCM, traditional Chinese  
medicine

For peer review only

1  
2  
3  
4 **Figure 1** Flowchart depicting the process for case enrollment.  
5

6 Abbreviations: ALD, alcoholic liver disease; CMV, cytomegalovirus; DILI, drug-induced  
7 liver injury; EBV, Epstein-Barr virus; HAV, hepatitis A virus; HBV, hepatitis B virus; HCV,  
8 hepatitis C virus; HEV, hepatitis E virus; HILI, herb-induced liver injury; NAFLD,  
9 non-alcoholic fatty liver disease; PMT, *Polygonum multiflorum* Thunb.  
10  
11  
12  
13  
14  
15  
16  
17  
18  
19  
20  
21  
22  
23  
24  
25  
26  
27  
28  
29  
30  
31  
32  
33  
34  
35  
36  
37  
38  
39  
40  
41  
42  
43  
44  
45  
46  
47  
48  
49  
50  
51  
52  
53  
54  
55  
56  
57  
58  
59  
60

For peer review only

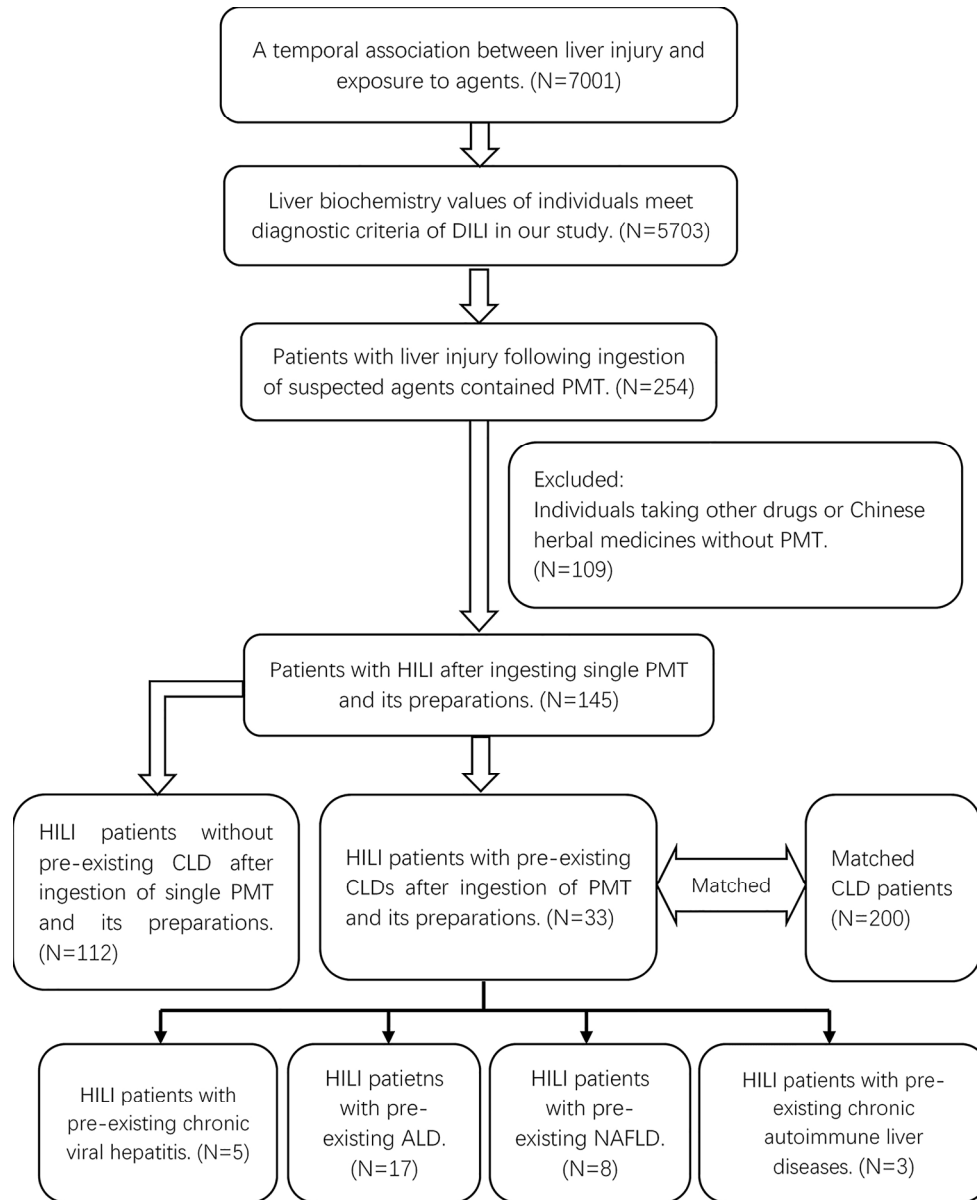

45  
46  
47  
48  
49  
50  
51  
52  
53  
54  
55  
56  
57  
58  
59  
60

Figure 1 Flowchart depicting the process for case enrollment.

203x249mm (300 x 300 DPI)

**STROBE 2007 (v4) checklist of items to be included in reports of observational studies in epidemiology\***  
**Checklist for cohort, case-control, and cross-sectional studies (combined)**

| Section/Topic             | Item # | Recommendation                                                                                                                                                                                                                                                                                                                                                                                                                                                         | Reported on page #                    |
|---------------------------|--------|------------------------------------------------------------------------------------------------------------------------------------------------------------------------------------------------------------------------------------------------------------------------------------------------------------------------------------------------------------------------------------------------------------------------------------------------------------------------|---------------------------------------|
| Title and abstract        | 1      | (a) Indicate the study's design with a commonly used term in the title or the abstract                                                                                                                                                                                                                                                                                                                                                                                 | Page 1                                |
|                           |        | (b) Provide in the abstract an informative and balanced summary of what was done and what was found                                                                                                                                                                                                                                                                                                                                                                    | Page 2-4                              |
| <b>Introduction</b>       |        |                                                                                                                                                                                                                                                                                                                                                                                                                                                                        |                                       |
| Background/rationale      | 2      | Explain the scientific background and rationale for the investigation being reported                                                                                                                                                                                                                                                                                                                                                                                   | Page 5-6                              |
| Objectives                | 3      | State specific objectives, including any pre-specified hypotheses                                                                                                                                                                                                                                                                                                                                                                                                      | Page 5-6                              |
| <b>Methods</b>            |        |                                                                                                                                                                                                                                                                                                                                                                                                                                                                        |                                       |
| Study design              | 4      | Present key elements of study design early in the paper                                                                                                                                                                                                                                                                                                                                                                                                                | Page 6                                |
| Setting                   | 5      | Describe the setting, locations, and relevant dates, including periods of recruitment, exposure, follow-up, and data collection                                                                                                                                                                                                                                                                                                                                        | Page 7                                |
| Participants              | 6      | (a) <i>Cohort study</i> —Give the eligibility criteria, and the sources and methods of selection of participants. Describe methods of follow-up<br><i>Case-control study</i> —Give the eligibility criteria, and the sources and methods of case ascertainment and control selection. Give the rationale for the choice of cases and controls<br><i>Cross-sectional study</i> —Give the eligibility criteria, and the sources and methods of selection of participants | Page 7-8                              |
|                           |        | (b) <i>Cohort study</i> —For matched studies, give matching criteria and number of exposed and unexposed<br><i>Case-control study</i> —For matched studies, give matching criteria and the number of controls per case                                                                                                                                                                                                                                                 | Page 6-7                              |
| Variables                 | 7      | Clearly define all outcomes, exposures, predictors, potential confounders, and effect modifiers. Give diagnostic criteria, if applicable                                                                                                                                                                                                                                                                                                                               | Page 8-9                              |
| Data sources/ measurement | 8*     | For each variable of interest, give sources of data and details of methods of assessment (measurement). Describe comparability of assessment methods if there is more than one group                                                                                                                                                                                                                                                                                   | Page 6-8                              |
| Bias                      | 9      | Describe any efforts to address potential sources of bias                                                                                                                                                                                                                                                                                                                                                                                                              | Page 6-7                              |
| Study size                | 10     | Explain how the study size was arrived at                                                                                                                                                                                                                                                                                                                                                                                                                              | Page 7-8                              |
| Quantitative variables    | 11     | Explain how quantitative variables were handled in the analyses. If applicable, describe which groupings were chosen and why                                                                                                                                                                                                                                                                                                                                           | Page 8-9                              |
| Statistical methods       | 12     | (a) Describe all statistical methods, including those used to control for confounding                                                                                                                                                                                                                                                                                                                                                                                  | Page 9                                |
|                           |        | (b) Describe any methods used to examine subgroups and interactions                                                                                                                                                                                                                                                                                                                                                                                                    | Page 9                                |
|                           |        | (c) Explain how missing data were addressed                                                                                                                                                                                                                                                                                                                                                                                                                            | We had no missing data in this study. |
|                           |        | (d) <i>Cohort study</i> —If applicable, explain how loss to follow-up was addressed                                                                                                                                                                                                                                                                                                                                                                                    | No patient loss to                    |

|                          |     |                                                                                                                                                                                                              |                                       |
|--------------------------|-----|--------------------------------------------------------------------------------------------------------------------------------------------------------------------------------------------------------------|---------------------------------------|
|                          |     | <i>Case-control study</i> —If applicable, explain how matching of cases and controls was addressed                                                                                                           | follow-up.                            |
|                          |     | <i>Cross-sectional study</i> —If applicable, describe analytical methods taking account of sampling strategy                                                                                                 |                                       |
|                          |     | (e) Describe any sensitivity analyses                                                                                                                                                                        | We did not make sensitivity analyses. |
| <b>Results</b>           |     |                                                                                                                                                                                                              |                                       |
| Participants             | 13* | (a) Report numbers of individuals at each stage of study—eg numbers potentially eligible, examined for eligibility, confirmed eligible, included in the study, completing follow-up, and analysed            | Page 10, 12                           |
|                          |     | (b) Give reasons for non-participation at each stage                                                                                                                                                         | Page 9                                |
|                          |     | (c) Consider use of a flow diagram                                                                                                                                                                           | Page 7, 40                            |
| Descriptive data         | 14* | (a) Give characteristics of study participants (eg demographic, clinical, social) and information on exposures and potential confounders                                                                     | Page 10-12                            |
|                          |     | (b) Indicate number of participants with missing data for each variable of interest                                                                                                                          | We had no missing data.               |
|                          |     | (c) <i>Cohort study</i> —Summarise follow-up time (eg, average and total amount)                                                                                                                             | Page 7                                |
| Outcome data             | 15* | <i>Cohort study</i> —Report numbers of outcome events or summary measures over time                                                                                                                          | Page 12-13                            |
|                          |     | <i>Case-control study</i> —Report numbers in each exposure category, or summary measures of exposure                                                                                                         |                                       |
|                          |     | <i>Cross-sectional study</i> —Report numbers of outcome events or summary measures                                                                                                                           |                                       |
| Main results             | 16  | (a) Give unadjusted estimates and, if applicable, confounder-adjusted estimates and their precision (eg, 95% confidence interval). Make clear which confounders were adjusted for and why they were included | Page 12-13                            |
|                          |     | (b) Report category boundaries when continuous variables were categorized                                                                                                                                    | Page 12-13                            |
|                          |     | (c) If relevant, consider translating estimates of relative risk into absolute risk for a meaningful time period                                                                                             |                                       |
| Other analyses           | 17  | Report other analyses done—eg analyses of subgroups and interactions, and sensitivity analyses                                                                                                               | Page 10-13                            |
| <b>Discussion</b>        |     |                                                                                                                                                                                                              |                                       |
| Key results              | 18  | Summarise key results with reference to study objectives                                                                                                                                                     | Page 14                               |
| Limitations              | 19  | Discuss limitations of the study, taking into account sources of potential bias or imprecision. Discuss both direction and magnitude of any potential bias                                                   | Page 16-17                            |
| Interpretation           | 20  | Give a cautious overall interpretation of results considering objectives, limitations, multiplicity of analyses, results from similar studies, and other relevant evidence                                   | Page 14-17                            |
| Generalisability         | 21  | Discuss the generalisability (external validity) of the study results                                                                                                                                        | Page 14-17                            |
| <b>Other information</b> |     |                                                                                                                                                                                                              |                                       |
| Funding                  | 22  | Give the source of funding and the role of the funders for the present study and, if applicable, for the original study on which the present article is based                                                | Page 19                               |

\*Give information separately for cases and controls in case-control studies and, if applicable, for exposed and unexposed groups in cohort and cross-sectional studies.

1  
2  
3  
4 **Note:** An Explanation and Elaboration article discusses each checklist item and gives methodological background and published examples of transparent reporting. The STROBE  
5 checklist is best used in conjunction with this article (freely available on the Web sites of PLoS Medicine at <http://www.plosmedicine.org/>, Annals of Internal Medicine at  
6 <http://www.annals.org/>, and Epidemiology at <http://www.epidem.com/>). Information on the STROBE Initiative is available at [www.strobe-statement.org](http://www.strobe-statement.org).  
7  
8  
9  
10  
11  
12  
13  
14  
15  
16  
17  
18  
19  
20  
21  
22  
23  
24  
25  
26  
27  
28  
29  
30  
31  
32  
33  
34  
35  
36  
37  
38  
39  
40  
41  
42  
43  
44  
45  
46  
47

For peer review only



# BMJ Open

## Association between the Concurrence of Pre-existing Chronic Liver Disease and Worse Prognosis in Patients with an Herb- *Polygonum multiflorum* Thunb. induced Liver Injury: A Case-control Study from a Specialized Liver Disease Center in China

|                                 |                                                                                                                                                                                                                                                                                                                                                                                                                                                                                                                                                                                                                                                                                                                                                                                                                                                                                                                                                                                                                                                                                                                                                                                                                                                                                                                                                                                        |
|---------------------------------|----------------------------------------------------------------------------------------------------------------------------------------------------------------------------------------------------------------------------------------------------------------------------------------------------------------------------------------------------------------------------------------------------------------------------------------------------------------------------------------------------------------------------------------------------------------------------------------------------------------------------------------------------------------------------------------------------------------------------------------------------------------------------------------------------------------------------------------------------------------------------------------------------------------------------------------------------------------------------------------------------------------------------------------------------------------------------------------------------------------------------------------------------------------------------------------------------------------------------------------------------------------------------------------------------------------------------------------------------------------------------------------|
| Journal:                        | <i>BMJ Open</i>                                                                                                                                                                                                                                                                                                                                                                                                                                                                                                                                                                                                                                                                                                                                                                                                                                                                                                                                                                                                                                                                                                                                                                                                                                                                                                                                                                        |
| Manuscript ID                   | bmjopen-2018-023567.R1                                                                                                                                                                                                                                                                                                                                                                                                                                                                                                                                                                                                                                                                                                                                                                                                                                                                                                                                                                                                                                                                                                                                                                                                                                                                                                                                                                 |
| Article Type:                   | Research                                                                                                                                                                                                                                                                                                                                                                                                                                                                                                                                                                                                                                                                                                                                                                                                                                                                                                                                                                                                                                                                                                                                                                                                                                                                                                                                                                               |
| Date Submitted by the Author:   | 17-Sep-2018                                                                                                                                                                                                                                                                                                                                                                                                                                                                                                                                                                                                                                                                                                                                                                                                                                                                                                                                                                                                                                                                                                                                                                                                                                                                                                                                                                            |
| Complete List of Authors:       | Jing, Jing; Medical School of Chinese PLA, Department of Integrative Medicine; Beijing 302 Hospital, Division of Integrative Medicine<br>Wang, Rui-lin; Beijing 302 Hospital, Division of Integrative Medicine<br>Zhao, Xin-yan; Capital Medical University Affiliated Beijing Friendship Hospital, Liver Research Center<br>Zhu, Yun; Beijing 302 Hospital, Division of Integrative Medicine<br>Niu, Ming; Beijing 302 Hospital, Institute of Chinese Herbal Medicine<br>Wang, Li-fu; Beijing 302 Hospital, Division of Integrative Medicine<br>Song, Xue-ai; Beijing 302 Hospital, Division of Integrative Medicine<br>He, Ting-ting; Beijing 302 Hospital, Division of Integrative Medicine<br>Sun, Yong-qiang; Beijing 302 Hospital, Division of Integrative Medicine<br>Xu, Wen-tao; Beijing 302 Hospital, Division of Integrative Medicine<br>Yu, Si-miao; Beijing 302 Hospital, Division of Integrative Medicine<br>Wang, Li-ping; Beijing 302 Hospital, Division of Integrative Medicine<br>Guo, Yu-ming; Beijing 302 Hospital, Institute of Chinese Herbal Medicine<br>Bai, Zhao-fang; Beijing 302 Hospital, Institute of Chinese Herbal Medicine<br>Xiao, Xiao-he; Medical School of Chinese PLA, Department of Integrative Medicine; Beijing 302 Hospital, Institute of Chinese Herbal Medicine<br>Wang, Jia-bo; Beijing 302 Hospital, Institute of Chinese Herbal Medicine |
| <b>Primary Subject Heading</b>: | Gastroenterology and hepatology                                                                                                                                                                                                                                                                                                                                                                                                                                                                                                                                                                                                                                                                                                                                                                                                                                                                                                                                                                                                                                                                                                                                                                                                                                                                                                                                                        |
| Secondary Subject Heading:      | Complementary medicine, Health policy, Medical management, Public health                                                                                                                                                                                                                                                                                                                                                                                                                                                                                                                                                                                                                                                                                                                                                                                                                                                                                                                                                                                                                                                                                                                                                                                                                                                                                                               |
| Keywords:                       | Herbal medicine < THERAPEUTICS, chronic liver disease, prognosis, drug induced liver injury[MeSH Terms]                                                                                                                                                                                                                                                                                                                                                                                                                                                                                                                                                                                                                                                                                                                                                                                                                                                                                                                                                                                                                                                                                                                                                                                                                                                                                |
|                                 |                                                                                                                                                                                                                                                                                                                                                                                                                                                                                                                                                                                                                                                                                                                                                                                                                                                                                                                                                                                                                                                                                                                                                                                                                                                                                                                                                                                        |

SCHOLARONE™  
Manuscripts

1  
2  
3  
4  
5  
6  
7  
8  
9  
10  
11  
12  
13  
14  
15  
16  
17  
18  
19  
20  
21  
22  
23  
24  
25  
26  
27  
28  
29  
30  
31  
32  
33  
34  
35  
36  
37  
38  
39  
40  
41  
42  
43  
44  
45  
46  
47  
48  
49  
50  
51  
52  
53  
54  
55  
56  
57  
58  
59  
60

1  
2  
3  
4 **Association between the Concurrence of Pre-existing Chronic Liver Disease**  
5  
6 **and Worse Prognosis in Patients with an Herb- *Polygonum multiflorum***  
7  
8 **Thunb. induced Liver Injury: A Case-control Study from a Specialized Liver**  
9  
10 **Disease Center in China**

11  
12 Jing Jing<sup>1,2†</sup>, Rui-lin Wang<sup>2†</sup>, Xin-yan Zhao<sup>3</sup>, Yun Zhu<sup>2</sup>, Ming Niu<sup>4</sup>, Li-fu Wang<sup>2</sup>, Xue-ai Song<sup>2</sup>,  
13  
14 Ting-ting He<sup>2</sup>, Yong-qiang Sun<sup>2</sup>, Wen-tao Xu<sup>2</sup>, Si-miao Yu<sup>2</sup>, Li-ping Wang<sup>2</sup>, Yu-ming Guo<sup>4</sup>,  
15  
16 Zhao-fang Bai<sup>4</sup>, Xiao-he Xiao<sup>1,4\*</sup>, Jia-bo Wang<sup>4\*</sup>  
17  
18

19  
20 <sup>1</sup> Department of Integrative Medicine, Medical School of Chinese PLA, Beijing 100853, China;

21 <sup>2</sup> Division of Integrative Medicine, Beijing 302 Hospital, Beijing 100039, China;

22 <sup>3</sup> Liver Research Center, Beijing Friendship Hospital, Capital Medical University, Beijing, 100069,  
23  
24 China.

25 <sup>4</sup> Institute of Chinese Herbal Medicine, Beijing 302 Hospital, Beijing 100039, China.  
26  
27

28 <sup>†</sup> Jing Jing and Rui-lin Wang contributed equally to this paper.  
29  
30

31 <sup>\*</sup> To whom correspondence should be addressed: Jia-bo Wang, China Military Institute of Chinese  
32  
33 Medicine, 302 Military Hospital. Email: pharm\_sci@126.com; Xiao-he Xiao, Medical School of  
34  
35 Chinese PLA; China Military Institute of Chinese Medicine, 302 Military Hospital, Beijing 100039,  
36  
37 China. Email: pharmacy302xxh@126.com. Jia-bo Wang (pharm\_sci@126.com) as show in Scholar  
38  
39 One. Jia-bo Wang and Xiao-he Xiao contributed equally to this paper.  
40  
41  
42  
43  
44  
45  
46  
47  
48  
49  
50  
51  
52  
53  
54  
55  
56  
57  
58  
59  
60

**Abstract**

**Objectives:** The present study aimed to evaluate the association between the concurrence of pre-existing chronic liver diseases (CLD) and worse prognosis in patients with HILI.

**Design:** A case-control study.

**Setting:** Tertiary hospital specializing in liver diseases in China.

**Participants:** 145 hospitalized HILI patients were assessed with respect to prognosis by comparing HILI with or without pre-existing CLD from February 2007 to February 2017. 25 HILI cases with pre-existing alcoholic liver disease (ALD) or non-alcoholic fatty liver disease (NAFLD) and 200 ALD or NAFLD controls matched 1:8 for sex, age ( $\pm 4$  years old), body mass index ( $\pm 2$  kg/m<sup>2</sup>), the type of CLD, alcohol intake ( $\pm 5$  g/d) and the presence or absence of cirrhosis.

**Primary outcome measures:** Mortality and chronicity in HILI patients with or without pre-existing CLD, and matched CLD patients.

**Results:** Of the 193714 hospitalized patients with liver diseases, 5703 patients met the diagnostic criteria for drug-induced liver injury (DILI), which was attributed to *Polygonum multiflorum* Thunb. (PMT) in 145 patients. Among these HILI patients, 22.8% (33 of 145) had pre-existing CLD, including 17 (51.5%) with ALD, 8 (24.2%) with NAFLD, 5 (15.2%) with chronic viral hepatitis and 3 (9.1%) with autoimmune liver disease. Compared with HILI patients without CLD, HILI patients with pre-existing CLD showed higher mortality (0.9% vs 9.1%,  $p=0.037$ ) and higher chronicity (12.5% vs 30.3%,  $p=0.016$ ). Compared with matched ALD (136 patients) or NAFLD (64 patients) patients, HILI patients with pre-existing ALD showed higher chronicity (35.3% vs 11.8%,  $p=0.019$ ). Multivariate logistic regression analysis found that concurrence of pre-existing CLD was an independent risk factor for both of chronicity and mortality (OR 3.966, 95% CI: 1.501–10.477,

1  
2  
3  
4  $p=0.005$ ), especially the chronicity (OR 3.035, 95%CI: 1.115-8.259,  $p=0.030$ ).

5  
6 **Conclusions:** Concurrence of pre-existing CLD could be an independent risk factor for worse  
7  
8 prognosis, especially chronicity, in PMT-related HILI.  
9

10  
11 **Key words:** drug-induced liver injury; herbal medicine; chronic liver disease; prognosis  
12  
13  
14  
15  
16  
17  
18  
19  
20  
21  
22  
23  
24  
25  
26  
27  
28  
29  
30  
31  
32  
33  
34  
35  
36  
37  
38  
39  
40  
41  
42  
43  
44  
45  
46  
47  
48  
49  
50  
51  
52  
53  
54  
55  
56  
57  
58  
59  
60

For peer review only

**Strengths and limitations of this study**

- This was a matched (1:8) case-control study in a large clinical database (n=193714) from a specialized liver disease center.
- This study focused on patients with one herb- *Polygonum multiflorum* Thunb. induced liver injury in order to avoid the confounding effects of different drugs on prognosis.
- We had simultaneously made comparisons among the three groups (HILI with CLD group, HILI without CLD group and matched CLD without HILI group) for distinguishing between HILI and CLD interactions.
- The present study was limited by the sample size, single-centre and retrospective nature of the study (ie, a tertiary hospital).

## Introduction

Concurrence of pre-existing chronic liver disease (CLD) with drug-induced liver injury (DILI) is a special challenge in clinical settings, which might render the liver sensitive to drug toxicity and cause higher fatality rates<sup>1</sup>. For instance, a case report showed that long-term alcohol intake could potentiate the hepatotoxicity of low doses of acetaminophen<sup>2</sup>. In addition, non-alcoholic fatty liver disease (NAFLD) and obesity might increase the risk for acute DILI caused by several synthetic agents, such as methotrexate and tamoxifen, resulting in more severe liver injury<sup>3-5</sup>. According to published data from the Drug-Induced Liver Injury Network (DILIN), a higher total fatality rate (19.0%) occurred in patients with known pre-existing liver diseases 6 months after the onset of DILI than in those without CLD (8.1%)<sup>6</sup>. However, these results in DILIN registry could be different from outcomes of DILI patients with pre-existing CLD in China due to different spectra of CLD and medication systems. Furthermore, no studies have tested whether the concurrence of pre-existing CLD is a major risk factor for worse prognosis in DILI<sup>3</sup>.

In particular, herbal medications are frequently used as alternative or supplementary agents to conventional synthetic drugs to treat chronic diseases in low- and middle-income countries (LMICs). In previous population surveys, herbal and dietary supplements (HDS) were used by one-third to one-half of the adult population in developed countries<sup>7</sup>. In a previous population survey of LMICs, the widespread use of traditional Chinese medicines (TCMs) was reported among 24.5% of middle-aged and older patients with chronic diseases in China<sup>8</sup>. However, the risk of herbal hepatotoxicity has not been fully addressed, especially in patients with pre-existing CLD. It was reported that the herbal formula, Xiao Chai Hu Tang, caused jaundice and abnormal liver function in a middle-aged woman with known pre-existing liver disease<sup>9,10</sup>. In addition, there

1  
2  
3 has been also a rising trend in the use of HDS in developed countries, although they are not  
4  
5 prescribed by physicians. Therefore, HILI coupled with pre-existing CLD is a critical and expanding  
6  
7 issue in most of these countries. However, knowledge about the intersection between  
8  
9 herb-induced liver injury (HILI) and pre-existing CLD has been largely limited.  
10  
11

12  
13 In this study, we analyzed the clinical characteristics and prognosis of HILI, especially in  
14  
15 patients with pre-existing CLD from a single center in China, and tested whether the concurrence  
16  
17 of pre-existing CLD was an independent risk factor for worse prognosis in HILI patients.  
18  
19  
20  
21  
22

## 23 **Methods**

### 24 **Study design**

25  
26 The case-control study included inpatients in Beijing 302 Hospital, a tertiary hospital specializing  
27  
28 in liver diseases in the Capital Region of China, from February 2007 to February 2017. Since  
29  
30 different drugs might have differential effects on prognosis, we found the HILI cases attributed to  
31  
32 the same herb in order to avoid the confounding effects of different drugs. Finally, *Polygonum*  
33  
34 *multiflorum* Thunb. (PMT) was found to be the most frequent herb attributed to HILI, and this  
35  
36 herb has been widely considered to cause hepatotoxicity over the past three decades<sup>11,12</sup>. Then,  
37  
38 we also divided enrolled patients with PMT-related HILI into patients with pre-existing CLD and  
39  
40 those without CLD. To determine the effects of different pre-existing CLD on the prognosis of HILI,  
41  
42 we selected PMT-related HILI patients with pre-existing CLD as the case group, and also identified  
43  
44 matched CLD patients without HILI as the control group. For each case, we selected eight controls  
45  
46 matched by sex, age ( $\pm 4$  years old), body mass index (BMI) ( $\pm 2$  kg/m<sup>2</sup>), the type of CLD, the daily  
47  
48 amount of alcohol intake ( $\pm 5$  g/d) and the presence or absence of cirrhosis.  
49  
50  
51  
52  
53  
54  
55  
56



1  
2  
3 Detailed data about demographics, medical history, clinical features, laboratory tests, and  
4  
5  
6 histological findings in all eligible patients was extracted from the electronic medical record  
7  
8 (EMR). The study protocol was approved by the ethics committee of the 302 Military Hospital,  
9  
10 and written informed consent was obtained from each enrolled patient, guardian or next of kin.  
11  
12  
13 The study flowchart is depicted in [Figure 1](#).

### 14 15 **Diagnostic criteria**

16  
17  
18 DILI or HILI diagnosis was performed according to the ACG clinical guideline for DILI<sup>3</sup>, which  
19  
20 consists of three parts: (i) any recent abnormal liver biochemistry indices; and (ii) chronological  
21  
22 use of all drugs and HDS within 6 months prior to the onset of abnormalities in liver testing; and  
23  
24 (iii) exclusion of recent acute liver injury indicating alternative causes. Abnormal liver  
25  
26 biochemistries should meet any of the three following conditions: (i) only a recent rise in alanine  
27  
28 or aspartate aminotransferase (ALT or AST)  $\geq 5$  times the upper limit of normal (ULN); (ii) alkaline  
29  
30 phosphatase (AKP)  $\geq 2$  times ULN; (iii) jaundice [serum total bilirubin (TB)  $\geq 2$  mg/dl] and  
31  
32 elevations of liver enzymes (ALT  $\geq 3$  ULN). For HILI patients with pre-existing CLD, the ULN was  
33  
34 replaced with the previously obtained baseline value prior to exposure to the suspected drugs.  
35  
36 When assessing alternative causes of HILI, cases with positive anti-hepatitis A virus IgM,  
37  
38 anti-hepatitis B core IgM, hepatitis B virus DNA, anti-hepatitis E virus IgM and anti-hepatitis E  
39  
40 virus IgG testing, or with non-hepatotropic virus infection, or with alcoholism within 3 months  
41  
42 prior to onset were excluded<sup>3,13-16</sup>.

43  
44  
45 In the case and control groups, CLD were defined as persistent liver diseases over 6 months,  
46  
47 including ALD, NAFLD, chronic viral hepatitis (CVH) and autoimmune liver diseases (AILD). ALD  
48  
49 was diagnosed in CLD patients with a history of excessive alcohol consumption over 5 years,  $\geq$

1  
2  
3 40 g/d for men and  $\geq 20$  g/d for women, and other causes of CLDs were excluded<sup>17</sup>. NAFLD was  
4  
5 diagnosed in patients with the radiographic imaging or histological findings compatible with  
6  
7 hepatic steatosis in the absence of excessive alcohol intake and other alternative causes such as  
8  
9 viral hepatitis, use of agents associated with hepatotoxicity, and iron overload<sup>18</sup>. CVH was  
10  
11 diagnosed based on positive serologic parameters, and in this study CVH involved chronic HBV  
12  
13 infection and chronic HCV infection<sup>19,20</sup>. AILD consisted of autoimmune hepatitis, primary biliary  
14  
15 cholangitis and the overlap syndrome between both of these conditions, and it was diagnosed  
16  
17 according to the antibody profiles and liver biopsy findings<sup>21,22</sup>.

### 22 23 **Procedures**

24  
25 In this study, we assessed clinical patterns of liver injury, causality and severity in all eligible  
26  
27 patients. By using R value, the ratio of ALT (as a multiple of its ULN) to ALP (as a multiple of its  
28  
29 ULN) at onset after intake of suspected drugs<sup>23</sup>, the clinical pattern of DILI was classified into  
30  
31 hepatocellular ( $R \geq 5$ ), cholestatic ( $R \leq 2$ ) and mixed liver injury ( $2 < R < 5$ ). Based on the Roussel  
32  
33 Uclaf Causality Assessment Method (RUCAM)<sup>24</sup>, a causal relationship between liver injury and  
34  
35 implicated agents among eligible patients was judged as highly probable ( $\geq 9$ ), probable (6-8),  
36  
37 possible (3-5), unlikely (1-2), or excluded ( $\leq 0$ ). . According to national and international practice  
38  
39 guidelines, the severity assessments of HILI were categorized into five grades, including mild,  
40  
41 moderate, severe, liver failure and fatal<sup>25,26</sup>. Additionally, the Model for End-Stage Liver Disease  
42  
43 (MELD) score was calculated as follows:  $9.6 * \ln [\text{creatinine (mg/dl)}] + 3.8 * \ln [\text{bilirubin (mg/dl)}] +$   
44  
45  $11.2 * \ln (\text{INR}) + 6.4$ .

46  
47  
48  
49  
50  
51  
52 Liver biopsies were reviewed by two hepatic pathologists, who were blinded to clinical  
53  
54 information including patients and suspected agents. And the pathological pattern of liver injury

1  
2  
3 was classified into acute hepatitis and chronic hepatitis, acute and chronic cholestasis, and  
4  
5  
6 cholestatic hepatitis<sup>27</sup>.  
7

8 The discontinuance of the causal agent(s) and alcohol intake was performed in every eligible  
9  
10 patient at HILI or CLD recognition. The follow-up visits in eligible cases were scheduled at 6 or 12  
11  
12 months through telephone dictation or uploaded clinical data from EMR. The patient was defined  
13  
14 as lost to follow-up if we were unable to contact with him or her at follow-up visit for any reason.  
15  
16  
17  
18  
19  
20  
21  
22  
23  
24  
25  
26  
27  
28  
29  
30  
31  
32  
33  
34  
35  
36  
37  
38  
39  
40  
41  
42  
43  
44  
45  
46  
47  
48  
49  
50  
51  
52  
53  
54  
55  
56  
57  
58  
59  
60

Chronicity was considered as the elevations of ALT, AST, TB or ALP >1 ULN or hepatic imaging or histological data in line with chronicity after 6 months from the recognition of HILI or CLD. According to detailed descriptions of the follow-up, all of the eligible patients were categorized with three current outcomes: (i) the recovery group, consisting of cases who had obtained persistent normalization of liver biochemistry after the withdrawal of implicated agent(s) over the 6-month follow-up; (ii) the chronic group, including cases with chronicity beyond 6-month follow-up; and (iii) the fatal group, including patients who underwent liver transplantation or died due to liver diseases.

### **Patient involvement**

No patient was involved in setting the research question, the design of the study, or their outcome measures. Regular contact with enrolled patients was to improve the implementation of the study. Finally, no patient had advised on dissemination including describing the research and its results.

### **Statistics.**

The data are characterized by the means  $\pm$  SDs for normal distribution, the median (Q1, Q3) for

1  
2  
3 abnormal distribution and the frequency distributions for categorical variables. Differences  
4  
5 between groups in continuous variables were assessed using Student's t-test and one-way  
6  
7 analysis of variance (ANOVA) or Wilcoxon's rank-sum test and the Kruskal-Wallis test based on  
8  
9 test of normality and homogeneity of variance, respectively. Differences between groups in  
10  
11 categorical variables were analyzed by the chi-squared test or Fisher's exact test, while results of  
12  
13 multiple comparisons were corrected by the Bonferroni's correction. The identification of factors  
14  
15 with  $p$  values less than 0.1 in univariate analysis was explored through multivariable logistic  
16  
17 regression analysis. Odds ratios (OR) and 95% confidence intervals (CIs) were calculated from the  
18  
19 model coefficients and standard errors.  $p < 0.05$  was considered statistically significant. All of the  
20  
21 statistical analyses were performed using Statistical Package for the Social Sciences (SPSS)  
22  
23 software, version 19.0 (SPSS Inc., Chicago, IL, USA).  
24  
25  
26  
27  
28  
29  
30  
31  
32

## 33 **Results**

### 34 **Demographics.**

35  
36 Of the 7001 hospitalized patients with temporal association between liver injury and drug  
37  
38 exposure among the 193,714 inpatients with liver diseases in the liver unit at Beijing Military 302  
39  
40 Hospital between February 2007 and January 2017, 5703 patients met the diagnostic criteria for  
41  
42 DILI, of whom 145 cases were attributed to PMT-related HILI (Figure S1, Table S1 and S2). Among  
43  
44 these cases, 33 (22.76%) with HILI had pre-existing CLD, while 112 cases (77.24%) did not have  
45  
46 pre-existing CLD (Figure 1). There was no difference in the mean ages between the HILI patients  
47  
48 with (45.60 years old, range 21.67-86.74) or without (42.61 years old, range 8.47-70.79)  
49  
50 pre-existing CLD. However, male patients accounted for a larger proportion of HILI patients with  
51  
52  
53  
54  
55  
56  
57  
58  
59  
60

1  
2  
3 pre-existing CLD than those without pre-existing CLD (67.7% vs 40.2%,  $p=0.007$ ) (Table 1).  
4  
5

6 Among enrolled patients with PMT-related HILI, 22.76% (33 of 145) had pre-existing CLD,  
7  
8 including 17 with ALD, 8 with NAFLD, 5 with CVH and 3 with AILD (Figure 1 and Table S3). HILI  
9  
10 patients with pre-existing ALD comprised well over 50% of male patients compared with those  
11  
12 without pre-existing CLD ( $p<0.001$ ), whereas HILI patients with pre-existing NAFLD implied no sex  
13  
14 differences from those without pre-existing CLD (Table 2 and 3). In contrast, BMI values might be  
15  
16 significantly higher in HILI cases with pre-existing NAFLD than in HILI cases without pre-existing  
17  
18 CLD, but there was no difference in HILI cases with pre-existing ALD and those without CLD  
19  
20  
21  
22  
23 (Tables 2 and 3).  
24  
25

### 26 **Clinical characteristics**

27  
28 The clinical features of HILI patients with or without pre-existing CLD are showed in Table 1. By  
29  
30 the use of R values, 145 eligible cases were classified into hepatocellular (n=137, 94.6%),  
31  
32 cholestatic (n=4, 2.7%) and mixed liver injury (n=4, 2.7%). Of HILI cases with and without  
33  
34 pre-existing CLD, based on the RUCAM scale, 11.0% were considered highly probable, 82.8% were  
35  
36 probable, 6.2% were possible, and no one was unlikely or excluded. The clinical patterns and  
37  
38 RUCAM scales in the HILI cases with pre-existing CLD were similar to those in HILI cases without  
39  
40  
41  
42  
43 CLD.  
44

45 The main presenting symptoms, including jaundice (93.9% vs 93.8%), anorexia (72.7% vs  
46  
47 75%), generalized weakness (72.7% vs 68.8%), nausea (51.5% vs 42.9%), abdominal discomfort  
48  
49 (27.3% vs 31.3%) and vomiting (9.1% vs 16.1%), were all profiled and showed fewer differences in  
50  
51  
52  
53 HILI patients with or without pre-existing CLD. Further, there were no differences in comorbidities  
54  
55 among HILI cases with or without pre-existing CLD, except for cardiovascular disease (12.1% vs  
56  
57  
58  
59  
60

1  
2  
3 1.8%,  $p=0.024$ ) (Table S4).  
4  
5

6         Nevertheless, there were more differences in clinical and laboratory findings among HILI  
7  
8 patients with pre-existing CLD, those without CLD, and matched CLD patients. Compared to the  
9  
10 levels in HILI patients without CLD, higher levels of serum TB (at peak, median, 10.38 vs 18.75  
11  
12 mg/dl,  $p=0.008$ ) and lower levels of serum albumin (at lowest, median, 35 vs 33 g/l,  $p=0.036$ ) and  
13  
14 cholinesterase (at lowest, 5138.79±1659.09 vs 4197.70±1969.99 U/l,  $p=0.007$ ) were found in HILI  
15  
16 patients with pre-existing CLD. In addition, MELD scores in HILI patients with pre-existing CLD  
17  
18 were significantly higher than in those without CLD (median, 15 vs 17,  $p=0.038$ ). To investigate  
19  
20 the impacts of different pre-existing CLD on HILI, we selected and analyzed two major types of  
21  
22 pre-existing CLDs (ALD and NAFLD) in HILI patients and matched ALD or NAFLD patients with HILI  
23  
24 patients (1:8) that who had corresponding pre-existing CLD (Table 2 and 3). The compared results  
25  
26 indicated that HILI patients with pre-existing ALD or NAFLD had more severe abnormalities in  
27  
28 liver biochemistry, including ALT, AST, ALP, TB, INR, serum albumin and cholinesterase, than  
29  
30 matched ALD or NAFLD patients ( $p$  for all  $<0.05$ ).  
31  
32  
33  
34  
35  
36  
37

### 38 **Histological findings**

39  
40 In 145 enrolled PMT-related HILI patients, liver biopsies were performed in 70 cases with and  
41  
42 without pre-existing CLD to confirm the diagnosis of HILI. The most common histological patterns  
43  
44 were acute (58.5%) hepatitis and acute cholestasis (24.6%), followed by chronic hepatitis (15.4%),  
45  
46 and cholestatic hepatitis (1.5%). Lobular inflammation, portal inflammation, Interface hepatitis,  
47  
48 with typical confluent necrosis, apoptosis and neutrophils, were frequently found in over 50% of  
49  
50 HILI cases with histologic information. Additionally, hepatocellular and/or canalicular cholestasis  
51  
52 in 26 HILI case, all of whose clinical patterns were hepatocellular liver injury. Histological patterns  
53  
54  
55  
56

1  
2  
3 between HILI patients with and without pre-existing CLD were similar ( $p>0.05$ ).  
4  
5

## 6 **Outcomes**

7

8 Recorded data on clinical outcomes during follow-up visits are shown in [Table 1](#) and [Table S5](#). All  
9  
10 enrolled patients with HILI or CLD were followed up until the end of the study. In 145 patients  
11  
12 with PMT-related HILI, 4 patients with hepatocellular (n=2) or cholestatic liver injury (n=2) died  
13  
14 because of hemorrhagic disease, one complication of liver diseases. Four patients progressed to  
15  
16 acute and chronic liver failure (ACLF) in 33 HILI patients with pre-existing CLD, while no one  
17  
18 developed ALCF in 112 HILI cases without CLD. Among 33 patients with HILI and CLD, 2 patients  
19  
20 died in 4 ALCF patients, whereas only one died in 29 patients without ALCF.  
21  
22  
23

24  
25 Of HILI patients with fatal outcomes, 3 HILI patients with pre-existing CLD and 1 HILI patient  
26  
27 without a pre-existing CLD died, whereas all of the matched CLD patients survived. Compared  
28  
29 with HILI patients without pre-existing CLD, HILI patients with pre-existing CLD had a higher  
30  
31 mortality rate (0.9% vs 9.1%,  $p=0.037$ ) and a greater rate of chronicity (12.5% vs 27.3%,  $p=0.041$ )  
32  
33 ([Table 1](#)). Moreover, HILI patients with pre-existing ALD had higher chronicity (11.8% vs 35.3%,  
34  
35  $p=0.038$ ) and a lower recovery rate (88.2% vs 58.8%,  $p=0.011$ ) than the matched ALD patients  
36  
37 ([Table 2](#)). In the univariate logistic regression analysis, the concurrence of pre-existing CLD was  
38  
39 considered a significant risk factor for worse outcomes (OR 4.203, 95% CI: 1.735-10.185,  $p=0.001$ ),  
40  
41 including chronicity (OR 3.043, 95% CI: 1.201-7.713,  $p=0.019$ ) and mortality (OR 11.100, 95% CI:  
42  
43 1.114-110.584,  $p=0.040$ ) ([Table 4](#)).  
44  
45  
46  
47  
48  
49

50 In the multivariate logistic regression analysis, clinically relevant variables (age and sex) and  
51  
52 those with statistical significance ( $p<0.1$ ) in the univariate analysis (pre-existing CLD, liver  
53  
54 biochemistries and MELD score) were introduced as covariates ([Table 4](#)). As variables with known  
55  
56

1  
2  
3 co-linearity or high correlations, the selection of one predictor for modeling was judged by  
4  
5 clinical practice. Multivariate logistic regression analysis showed that the concurrences of  
6  
7 pre-existing CLD (OR 3.966, 95% CI: 1.501-10.477,  $p=0.005$ ) and peak ALT (OR 0.999, 95% CI:  
8  
9 0.998-1.000,  $p=0.022$ ) were independently associated with worse outcomes, including chronicity  
10  
11 and mortality . In multivariate logistic regression analysis for different worse outcomes, the  
12  
13 concurrence of pre-existing CLD was likely to be an independent risk factor for chronic outcomes  
14  
15 of HILI (OR 3.035, 95%CI: 1.115-8.259,  $p=0.030$ ) as well as MELD scores for liver-related death (OR  
16  
17 1.222, 95%CI: 1.052-1.421,  $p=0.009$ ). In addition, the concurrence of pre-existing CLD might be a  
18  
19 potentially relevant factor with a trend close to significance for fatal outcomes of HILI ( $p=0.078$ ).  
20  
21  
22  
23  
24  
25  
26  
27

## 28 Discussion

29  
30 In this study, PMT-related HILI patients with pre-existing CLD showed a higher mortality rate  
31  
32 (0.9% vs 9.1%,  $p=0.037$ ) and a greater rate of chronicity (12.5% vs 30.3%,  $p=0.016$ ) than those  
33  
34 without CLD. Multivariate logistic regression analysis illustrated that concurrence of pre-existing  
35  
36 CLD was an independent risk factor for chronic and fatal outcomes (OR 3.966, 95% CI:  
37  
38 1.501–10.477,  $p=0.005$ ), especially the former (OR 3.035, 95%CI: 1.115-8.259,  $p=0.030$ ). Thus, the  
39  
40 concurrence of pre-existing CLD is likely to be an independent risk factor for worse prognosis,  
41  
42 especially chronicity, in PMT-related HILI. These results provide new insights into the clinical study  
43  
44 and management of alternative treatment with herbal medications, especially in patients with  
45  
46 pre-existing CLD.  
47  
48  
49  
50  
51

52 In LMICs, herbal medications, rather than synthetic drugs, are frequently used as alternative  
53  
54 or supplementary agents to replace conventional synthetic drugs to treat chronic diseases due to  
55



1  
2  
3 the lower cost of TCM and limited access to conventional medicines in remote areas of LMICs<sup>26,28</sup>.

4  
5  
6 Thus, this study might partly explain why the proportion of PMT-related HILI patients with  
7  
8 pre-existing CLD among all enrolled HILI patients from China (a LMIC) seemed to be markedly  
9  
10 higher than the proportion of DILI patients with pre-existing CLD among all DILI patients from the  
11  
12 United States (a developed country)<sup>13</sup> (22.8% vs 9.9%, respectively). In addition, the use of HDS  
13  
14 and the constituent ratio of HILI in DILI cohorts appeared to show increasing trends<sup>29</sup>.

15  
16 Self-medication among patients with CLD often accounts for a proportion of herbal medication  
17  
18 use<sup>28</sup>. Therefore, HILI coupled with pre-existing CLD is a critical and expanding issue in most of  
19  
20 these countries.  
21  
22  
23

24  
25 In this study, we noted that ALD was the primary type of pre-existing CLD involved in  
26  
27 PMT-related HILI, followed by NAFLD, CVH and AILD. In contrast, pre-existing hepatitis C or NAFLD  
28  
29 often underlie DILI in the DILIN registry<sup>13</sup>. The difference between this study and the DILIN  
30  
31 registry might be associated with the different spectra of liver diseases, medication systems and  
32  
33 socioeconomic backgrounds. According to a retrospective nationwide analysis, the risk of acute  
34  
35 DILI could increase with pre-existing ALD (aOR 6.46; 95% CI: 4.53-9.21) and NAFLD (aOR 7.43;  
36  
37 95% CI: 3.30-16.7)<sup>30</sup>. Thus, PMT and its products should be prudently administered to patients  
38  
39 with pre-existing ALD or NAFLD.  
40  
41  
42  
43  
44

45  
46 Interestingly, the laboratory findings of HILI patients with pre-existing CLD were similar to  
47  
48 those of HILI patients, rather than to those of patients with corresponding CLD. Additionally,  
49  
50 histological patterns had no difference between PMT-related HILI patients with and without  
51  
52 pre-existing CLD in this study. These results showed that abnormal liver biochemistries and  
53  
54 histological findings were dominated by PMT and its products, although these HILI patients had  
55  
56

1  
2  
3 pre-existing CLD. For instance, HILI patients with pre-existing CLD and those without CLD could  
4  
5 have patterns of sharply increasing levels of ALT, AST, ALP and TB, while CLD patients could have  
6  
7 trends of slightly elevated levels of these factors. Thus, the diagnosis of HILI is likely to depend on  
8  
9 the pattern of increasing levels of liver biochemistries and histological findings, especially in  
10  
11 patients with pre-existing CLD. However, compared with those in HILI patients without CLD, the  
12  
13 peak value of serum TB and the lowest values of serum albumin and cholinesterase were more  
14  
15 severe in HILI patients with pre-existing CLD, most of whom were diagnosed with hepatocellular  
16  
17 liver injury. Previous studies and Zimmerman's observations have confirmed that increased  
18  
19 bilirubin levels and hepatocellular liver injury caused by drugs were associated with 10%-50%  
20  
21 mortality and liver transplantation rates from liver failure<sup>31</sup>. More severe hypoalbuminemia and  
22  
23 lower choline esterase activity could be explained by underlying impaired liver function due to  
24  
25 reduced synthesis<sup>32,33</sup>. In a previous study of hepatotoxicity caused by active antiretroviral agents,  
26  
27 patients with acute DILI appeared to be more severe in those with CVH<sup>34</sup>. Consequently, care  
28  
29 should be taken to monitor and manage patients with pre-existing CLD who digest herbal  
30  
31 medications by either physician prescription or self-medication.  
32  
33  
34  
35  
36  
37  
38  
39

40 Notably, this study showed that PMT-related HILI patients with pre-existing CLD had higher  
41  
42 mortality and greater chronicity. Furthermore, concurrence of pre-existing CLD could be an  
43  
44 independent risk factor for worse prognosis, especially chronicity, in PMT-related HILI. Although  
45  
46 PMT-related HILI patients with pre-existing CLD (9.10%) in this study showed similar liver-related  
47  
48 mortality rates as DILI patients with pre-existing CLD (9.12%) in the DILIN registry, PMT-related  
49  
50 HILI patients with pre-existing CLD were more likely to develop chronic outcomes (30.3%) than  
51  
52 DILI patients with pre-existing CLD (13.7%) in the DILIN study<sup>13</sup>. PMT-related HILI patients with  
53  
54  
55  
56  
57  
58  
59  
60

1  
2  
3 pre-existing ALD were more likely to have chronic liver diseases than matched ALD patients. In a  
4  
5  
6 study of pulmonary TB patients treated with various antituberculosis drugs, multivariate analysis  
7  
8 revealed prior alcohol consumption to be a risk factor for recurrent DILI<sup>35</sup>. Additionally, ACLF  
9  
10 might be increase the risk for liver related mortality in HILI patients with pre-existing CLD. In a  
11  
12 retrospective cohort study, hepatic necrosis and hepatic encephalopathy could be significantly  
13  
14 associated with liver related deaths in HILI caused by Ayurvedic and herbal medicines<sup>36</sup>. Acute  
15  
16 DILI in individuals with pre-existing CLD was hypothesized to result in severe liver injury or slower  
17  
18 to recovery due to impaired liver regeneration<sup>3</sup>. Therefore, patients with pre-existing CLD  
19  
20 following ingestion of herbal TCM should be considered, with a focus on the increased risk of HILI  
21  
22 and its worse prognosis.  
23  
24  
25  
26

27  
28 The present study is noteworthy for several reasons. First, this was a matched (1:8)  
29  
30 case-control study on HILI combined with CLD in a large clinical database (n=193714) from a  
31  
32 specialized liver disease center in China. Second, the HILI cases in the present study attributed to  
33  
34 the same herb were found in order to avoid differential effects of confounding variables (different  
35  
36 drugs) on prognosis. Third, the comparisons were simultaneously analyzed among the three  
37  
38 groups (HILI with CLD group, HILI without CLD group and matched CLD without HILI group) for the  
39  
40 sake of distinguishing between HILI and CLD interactions. These methods of clinical study was  
41  
42 rarely published in previous researches on DILI or HILI<sup>3,13</sup>. Additionally, the association between  
43  
44 concurrence of pre-existing CLD and worse prognosis of HILI was discovered in this study. In  
45  
46 previous studies, knowledge about intersection between HILI and pre-existing CLD has been  
47  
48 limited.  
49  
50  
51  
52  
53

54 However, our study has some limitations. There were potential selection bias and recall bias  
55  
56

1  
2  
3 in this study because of its single-center and retrospective design. Furthermore, the present  
4  
5  
6 study investigated clinical characteristics and prognosis of an herb-PMT related HILI in patients  
7  
8 with CLD, so this affected the sample size of enrolled patients and the power of our study.  
9

10 In conclusion, HILI patients with pre-existing CLD should receive heightened attention owing  
11  
12 to an increased risk of worse prognosis. Although patients with pre-existing CLD might benefit  
13  
14 from the use of complementary and alternative medicines (CAM), especially herbal remedies,  
15  
16 they are most likely to experience fatality or chronicity after suffering from HILI caused by herbal  
17  
18 TCM. Therefore, providing strict monitoring and supervision of CAM, including herbal TCM, in the  
19  
20 treatment of patients with pre-existing CLD is crucial in LMICs. Based on the present research  
21  
22 design, further large samples, multi-center and prospective studies are needed to find the  
23  
24 distinctive characteristics, risk factors, and predictors of prognosis in all-cause DILI patients with  
25  
26 pre-existing CLD.  
27  
28  
29  
30  
31  
32  
33  
34  
35  
36  
37  
38  
39  
40  
41  
42  
43  
44  
45  
46  
47  
48  
49  
50  
51  
52  
53  
54  
55  
56  
57  
58  
59  
60

### Acknowledgements

The authors appreciate the contributions of all the subjects and the staff (the doctors, nurses and administrative staff) at Beijing 302 Hospital for this study.

For peer review only

**Footnotes**

Jing Jing and Rui-lin Wang contributed equally.

**Contributors:** Jia-bo Wang, Xiao-he Xiao and Jing Jing designed the study. Jing Jing, Rui-lin Wang, Yun Zhu, Ming Niu, Li-fu Wang, Xue-ai Song, Ting-ting He, Yong-qiang Sun, Li-ping Wang, Wen-tao Xu and Si-miao Yu collected the patient's clinical data; Xin-yan Zhao reviewed liver biopsies; Jing Jing, Yu-ming Guo, Zhao-fang Bai analyzed the data. Jing Jing and Rui-lin Wang translated and wrote the paper. Xiao-he Xiao and Jia-bo Wang took charge of the project and amended the paper. All authors read and approved the final version of manuscript.

**Funding:** This work was supported by the National Key Technology R&D Program (no. 2015ZX09501-004-001-008 and 2015ZX09501004-001-002), the National TCM Industry Science and Technology Program (no. 201507004-04), the National Natural Science Foundation of China (nos. 81373984 and 81403126) and Beijing Natural Science Foundation (no. 7152142).

**Conflict-of-interest statement:** Jing Jing, Rui-lin Wang, Xin-yan Zhao, Yun Zhu, Ming Niu, Li-fu Wang, Xue-ai Song, Ting-ting He, Yong-qiang Sun, Wen-tao Xu, Si-miao Yu, Li-ping Wang, Yu-ming Guo, Zhao-fang Bai, Xiao-he Xiao and Jia-bo Wang declare that they have no competing interests for publication.

**Patient consent:** Obtained.

**Ethics approval:** The ethics committee of Beijing 302 Hospital approved this study (No: 2017056D).

**Data sharing statement:** No additional data are available.

## Reference

1. Zimmerman HJ. Hepatotoxicity. The adverse effects of drugs and other chemicals on the liver. Second Edition. Philadelphia (PA): Lippincott, Williams and Wilkins; 1999: 430.
2. O'Dell JR, Zetterman RK, Burnett DA. Centrilobular hepatic fibrosis following acetaminophen-induced hepatic necrosis in an alcoholic. *Jama* 1986;255(19):2636-2637.
3. Chalasani NP, Hayashi PH, Bonkovsky HL, et al. ACG Clinical Guideline: the diagnosis and management of idiosyncratic drug-induced liver injury. *Am J Gastroenterol* 2014;109(7):950-966; quiz 967.
4. Fromenty B. Drug-induced liver injury in obesity. *J Hepatol* 2013;58(4):824-826.
5. Michaut A, Moreau C, Robin M-A, et al. Acetaminophen-induced liver injury in obesity and nonalcoholic fatty liver disease. *Liver International*. 2014;34(7):e171-e179.
6. Fontana RJ, Hayashi PH, Gu J, et al. Idiosyncratic drug-induced liver injury is associated with substantial morbidity and mortality within 6 months from onset. *Gastroenterology* 2014;147(1):96-108.e104.
7. Navarro V, Khan I, Bjornsson E, et al. Liver injury from herbal and dietary supplements. *Hepatology* 2017;65(1):363-373.
8. Liu T, Li X, Zou ZY, et al. The prevalence and determinants of using Traditional Chinese Medicine among middle-aged and older Chinese adults: Results from the China Health and Retirement Longitudinal Study. *J Am Med Dir Assoc* 2015;16(11):1002.e1-5.
9. L.M.Hsu, Y.S.Huang, S.H.Tsay, et al. Acute hepatitis induced by Chinese hepatoprotective herb, Xiao-Chai-Hu-Tang. *J Chin Med Assoc* 2006;69(2):86-88.

10. Teschke R, Eickhoff A. Herbal hepatotoxicity in traditional and modern medicine: Actual key issues and new encouraging steps. *Front Pharmacol*. 2015;6:72.
11. Zhu Y, Niu M, Chen J, et al. Comparison between Chinese Herbal Medicine and Western Medicine-induced liver injury of 1985 patients. *J Gastroenterol Hepatol* 2016;31:1476-1482.
12. Jung KA, Min HJ, Yoo SS, et al. Drug-induced liver injury: Twenty five cases of acute hepatitis following ingestion of *Polygonum multiflorum* Thunb. *Gut Liver* 2011;5(4):493-499.
13. Chalasani N, Bonkovsky HL, Fontana R, et al. Features and outcomes of 899 patients with drug-induced liver injury: The DILIN prospective study. *Gastroenterology* 2015;148(7):1340-1352.e1347.
14. Aithal G, Watkins P, Andrade R, et al. Case definition and phenotype standardization in drug-induced liver injury. *Clin Pharmacol Ther* 2011;89(6):806-815.
15. Chalasani N, Regev A. Drug-induced liver injury in patients with preexisting chronic liver disease in drug development: How to identify and manage? *Gastroenterology*. 2016;151(6):1046-1051.
16. Teschke R, Danan G. Diagnosis and management of drug-induced liver injury (DILI) in patients with pre-existing liver disease. *Drug Saf* 2016;39(9):801-821.
17. European Association for the Study of Liver. EASL Clinical Practical Guidelines: Management of Alcoholic Liver Disease. *J Hepatol* 2012; 57(2):399-420.
18. Chalasani N, Younossi Z, Lavine JE, et al. The diagnosis and management of nonalcoholic fatty liver disease: practice guideline from the American Association for the Study of Liver Diseases. *hepatology* 2018;67(1):328-357.



- 1  
2  
3  
4 19. European Association for the Study of the Liver. EASL 2017 clinical practice guidelines on the  
5  
6 management of hepatitis B virus infection. *J Hepatol* 2017;67(2):370-398.  
7  
8  
9 20. Omata M, Kanda T, Wei L, et al. APASL consensus statements and recommendation on  
10  
11 treatment of hepatitis C. *Hepatol Int* 2016;10(5):702-726.  
12  
13  
14 21. European Association for the Study of the Liver. EASL clinical practice guidelines: Autoimmune  
15  
16 hepatitis. *J Hepatol* 2015;63(4):971-1004.  
17  
18  
19 22. European Association for the Study of the Liver. EASL clinical practice guidelines: Management  
20  
21 of cholestatic liver diseases. *J Hepatol* 2009;51(2):237-267.  
22  
23  
24 23. Bénichou C. Criteria of drug-induced liver disorders. Report of an international consensus  
25  
26 meeting. *J Hepatol* 1990;11(2):272-276.  
27  
28  
29 24. Danan G, Teschke R. RUCAM in drug and herb induced liver injury: The update. *Int J Mol Sci*  
30  
31 2015;17(1):1-33.  
32  
33  
34 25. Yu YC, Mao YM, Chen CW, et al. CSH guidelines for the diagnosis and treatment of  
35  
36 drug-induced liver injury. *Hepatol Int* 2017;11(3):221-241.  
37  
38  
39 26. Wang JB, Zhu Y, Bai ZF, et al. Guidelines for the diagnosis and management of herb-induced  
40  
41 liver injury. *Chin J Integr Med* 2018;15. doi: 10.1007/s11655-018-3000-8.  
42  
43  
44 27. Kleiner D E, Chalasani N, Lee W M, et al. Hepatic histological findings in suspected  
45  
46 drug-induced liver injury: Systematic evaluation and clinical associations. *Hepatology* 2014;  
47  
48 59(2): 661-670.  
49  
50  
51 28. Olsson S, Pal SN, Dodoo A. Pharmacovigilance in resource-limited countries. *Expert Rev Clin*  
52  
53 *Pharmacol* 2015;8(4):449-460.  
54  
55

- 1  
2  
3  
4 29. Navarro VJ, Khan I, Bjornsson E, et al. Liver injury from herbal and dietary supplements.  
5  
6 *Hepatology* 2017;65(1):363-373.  
7  
8  
9 30. Nguyen GC, Sam J, Thuluvath PJ. Hepatitis C is a predictor of acute liver injury among  
10  
11 hospitalizations for acetaminophen overdose in the United States: a nationwide analysis.  
12  
13 *Hepatology* 2008;48(4):1336-1341.  
14  
15  
16 31. Robles-Diaz M, Lucena MI, Kaplowitz N, et al. Use of Hy's law and a new composite algorithm  
17  
18 to predict acute liver failure in patients with drug-induced liver injury. *Gastroenterology*.  
19  
20 2014;147(1):109-118 e105.  
21  
22  
23 32. Gatta A, Verardo A, Bolognesi M. Hypoalbuminemia. *Intern Emerg Med* 2012;7 Suppl  
24  
25 3:S193-199.  
26  
27  
28 33. Eisenbach C, Sieg O, Stremmel W, et al. Diagnostic criteria for acute liver failure due to Wilson  
29  
30 disease. *World J Gastroenterol* 2007;13(11):1711-1714.  
31  
32  
33 34. Nunez M. Clinical syndromes and consequences of antiretroviral-related hepatotoxicity.  
34  
35 *Hepatology* 2010;52(3):1143-1155.  
36  
37  
38 35. Teschke R, Danan G. Drug-induced liver injury: Is chronic liver disease a risk factor and a  
39  
40 clinical issue? *Expert Opin Drug Metab Toxicol* 2017;13(4):425-438.  
41  
42  
43 36. Philips C A, Paramaguru R, Joy A K, et al. Clinical outcomes, histopathological patterns, and  
44  
45 chemical analysis of Ayurveda and herbal medicine associated with severe liver injury-A  
46  
47 single-center experience from southern India. *Indian J Gastroenterol* 2018;37(1):9-17.  
48  
49  
50  
51  
52  
53  
54  
55  
56  
57  
58  
59  
60

**Table 1.** The characteristics among PMT-related HILI patients with or without pre-existing CLD.

| Characteristic                              | Entire cohort of HILI<br>(n=145, 100%) | HILI with pre-existing CLD<br>(n=33, 22.76%) | HILI without CLD<br>(n=112, 77.24%) | <i>p</i><br>value |
|---------------------------------------------|----------------------------------------|----------------------------------------------|-------------------------------------|-------------------|
| Males (%)                                   | 67 (46.2%)                             | 22 (66.7%)                                   | 45 (40.2%)                          | 0.007             |
| Age (years, mean±SD)                        | 43.29±13.68                            | 45.60±13.04                                  | 42.61±13.85                         | 0.272             |
| BMI (kg/m <sup>2</sup> , mean±SD)           | 23.37±3.40                             | 24.64±3.57                                   | 23.00±3.27                          | 0.015             |
| Prior drug allergies (%)                    | 11(7.6%)                               | 1(3.0%)                                      | 10(8.9%)                            | 0.236             |
| Latency (days, median [IQR])                | 50.0(31.0,91.0)                        | 45.0(29.5,105.0)                             | 51.0(31.0,88.5)                     | 0.777             |
| Re-challenge (%)                            | 7(4.8%)                                | 1(3.0%)                                      | 6(5.4%)                             | 0.499             |
| Alcohol use <sup>†</sup> (%)                | 28(19.3%)                              | 17(51.5%)                                    | 11(9.8%)                            | <0.001            |
| <b>Laboratory index in DILI recognition</b> |                                        |                                              |                                     |                   |
| WBC (×10 <sup>9</sup> /L, median [IQR])     | 5.34(4.30, 6.56)                       | 4.89(4.39,6.50)                              | 5.37(4.23,6.56)                     | 0.899             |
| HGB (g/L, mean±SD)                          | 135.59±18.20                           | 137.82±18.72                                 | 134.94±18.08                        | 0.426             |

|                                                           |                         |                         |                         |       |
|-----------------------------------------------------------|-------------------------|-------------------------|-------------------------|-------|
| PLT ( $\times 10^9/L$ , mean $\pm$ SD)                    | 213.47 $\pm$ 71.00      | 196.79 $\pm$ 78.72      | 218.37 $\pm$ 68.16      | 0.125 |
| Peripheral eosinophilia ( $\times 10^9/L$ , median [IQR]) | 0.16(0.10,0.28)         | 0.21(0.14,0.28)         | 0.15(0.09,0.28)         | 0.114 |
| <b>Peak values of laboratory index</b>                    |                         |                         |                         |       |
| ALT (U/L, median [IQR])                                   | 1208.70(826.05,1537.00) | 1276.00(806.00,1671.00) | 1173.00(833.00,1472.05) | 0.551 |
| AST (U/L, median [IQR])                                   | 739.00(494.00,1051.00)  | 873.00(445.00,1292.50)  | 716.90(493.50,1041.60)  | 0.341 |
| ALP (U/L, median [IQR])                                   | 179.0(141.5,215.0)      | 177.00(145.50,230.55)   | 180.00(139.50,213.50)   | 0.786 |
| TB (mg/dL, median [IQR])                                  | 10.76(6.15,18.96)       | 18.75(7.69,25.18)       | 10.38(5.59,16.77)       | 0.008 |
| Albumin (g/L, median [IQR])                               | 34(31,38)               | 33.00(27.50,37.00)      | 35.00(32.00,38.00)      | 0.036 |
| Cholinesterase (U/L, mean $\pm$ SD)                       | 4924.61 $\pm$ 1772.28   | 4197.70 $\pm$ 1969.99   | 5138.79 $\pm$ 1659.09   | 0.007 |
| INR (median [IQR])                                        | 1.07(0.98,1.02)         | 1.09(0.97,1.40)         | 1.07(0.99,1.15)         | 0.488 |
| <b>Pattern of liver injury</b>                            |                         |                         |                         |       |
| HC/Chol/Mixed (%)                                         | 137/4/4                 | 30/2/1                  | 107/2/3                 | 0.399 |

|                                                      |            |           |           |       |
|------------------------------------------------------|------------|-----------|-----------|-------|
| RUCAM score (median [IQR])                           | 8(7,8)     | 7(6,8)    | 8(7,8)    | 0.003 |
| Possible/probable/highly probable                    | 9/120/16   | 2/30/1    | 7/90/15   | 0.275 |
| <b>Severity of Liver Injury‡ (% of column total)</b> |            |           |           | 0.120 |
| Mild                                                 | 8(5.5%)    | 1(3.0%)   | 7(6.3%)   |       |
| Moderate                                             | 18(12.4%)  | 2(6.1%)   | 16(14.3%) |       |
| Severe                                               | 105(72.4%) | 25(75.8%) | 80(71.4%) |       |
| Liver failure                                        | 10(6.9%)   | 2(6.1%)   | 8(7.1%)   |       |
| Fatal                                                | 4(2.8%)    | 3(9.1%)   | 1(0.9%)   |       |
| MELD score (median [IQR])                            | 15(12,18)  | 17(13,20) | 15(11,17) | 0.038 |
| <b>Prognosis (% of column total)</b>                 |            |           |           |       |
| Recovery                                             | 120(82.8%) | 20(60.6%) | 97(86.6%) | 0.001 |
| Chronic                                              | 20(13.8%)  | 10(30.3%) | 14(12.5%) | 0.016 |

|       |         |         |         |       |
|-------|---------|---------|---------|-------|
| Fatal | 5(3.4%) | 3(9.1%) | 1(0.9%) | 0.037 |
|-------|---------|---------|---------|-------|

<sup>†</sup> The patients with histories of excessive alcohol use (alcohol intake of  $\geq 40$  g/d for men and  $\geq 20$  g/d for women) did not drink during three months prior to the onset of liver injury.

<sup>‡</sup> The severity assessments of HILI were graded as follows<sup>31,32</sup>: mild, reversible elevations of serum ALT and/or ALP levels, TB  $< 2.5$  mg/dl and international normalized ratio (INR)  $< 1.5$ ; moderate elevations of serum ALT and/or ALP levels with associated TB  $\geq 2.5$  mg/dl or INR  $\geq 1.5$ ; severe, elevations of serum ALT and/or ALP levels and TB  $\geq 5$  mg/dl, with or without INR  $\geq 1.5$ ; liver failure, elevation of serum ALT and/or ALP level with TB  $\geq 10$  mg/dl or a sharp increase of 1 mg/dl per day, INR  $\geq 1.5$ , with relevant ascites, hepatic encephalopathy or other organ failure related to DILI; death or liver transplantation because of DILI.

Abbreviations: ALP, serum alkaline phosphatase; ALT, serum alanine transaminase; AST, serum aspartate aminotransferase; BMI, body mass index; Chol, cholestatic; CLD, chronic liver diseases; DILI, drug-induced liver injury; HC, hepatocellular; HGB, hemoglobin; HILI, herb induced liver injury; INR, international normalized ratio; IQR, interquartile range (25-75%); MELD, Model for End-Stage Liver Disease; PMT, *Polygonum multiflorum* Thunb.; PLT, platelet; RUCAM, the Roussel Uclaf Causality Assessment Method; SD, standard deviation; TB, serum total bilirubin; WBC, white blood cell

**Table 2** The characteristics of PMT-related HILI patients with pre-existing ALD compared to those of PMT-related HILI patients without CLD and matched ALD patients.

| Characteristic                         | HILI without CLD group<br>(n=112) | HILI with pre-existing ALD<br>group<br>(n=17) | Matched ALD group<br>( n=136 ) | <i>p</i><br>value <sup>A</sup> | <i>p</i><br>value <sup>B</sup> | <i>p</i><br>value <sup>C</sup> | <i>p</i><br>value <sup>D</sup> |
|----------------------------------------|-----------------------------------|-----------------------------------------------|--------------------------------|--------------------------------|--------------------------------|--------------------------------|--------------------------------|
| Males (%)                              | 45(40.2%)                         | 15(88.2%)                                     | 120(88.2%)                     | <0.001                         | <0.001                         | <0.001                         | 1.00                           |
| Age (years, median [IQR])              | 43.79(33.80, 53.41)               | 45.15(38.68, 56.00)                           | 45.17(38.34, 51.65)            | 0.567                          |                                |                                |                                |
| BMI (kg/m <sup>2</sup> , median [IQR]) | 22.48(20.45, 24.96)               | 24.06(20.67, 26.76)                           | 23.51(22.10, 24.73)            | 0.133                          |                                |                                |                                |
| Liver cirrhosis (%)                    | 8(7.1%)                           | 3(17.6%)                                      | 32(23.5%)                      | 0.001                          | 0.480                          | <0.001                         | 1.00                           |
| Peak of serum ALT (U/L, median [IQR])  | 1173.00(833.00,1472.05)           | 1389.00(911.85,1842.50)                       | 54.50(30.00, 90.75)            | <0.001                         | 0.801                          | <0.001                         | <0.001                         |
| Peak of serum AST (U/L, median [IQR])  | 716.90(493.50,1041.60)            | 878.00(423.50,1359.00)                        | 46.50(26.00, 91.00)            | <0.001                         | 1.00                           | <0.001                         | <0.001                         |

1  
2  
3  
4  
5  
6  
7  
8  
9  
10  
11  
12  
13  
14  
15  
16  
17  
18  
19  
20  
21  
22  
23  
24  
25  
26  
27  
28  
29  
30  
31  
32  
33  
34  
35  
36  
37  
38  
39  
40  
41  
42  
43  
44  
45  
46  
47

| Characteristic                          | HILI without CLD group<br>(n=112) | HILI with pre-existing ALD<br>group<br>(n=17) | Matched ALD group<br>( n=136 ) | <i>p</i><br>value <sup>A</sup> | <i>p</i><br>value <sup>B</sup> | <i>p</i><br>value <sup>C</sup> | <i>p</i><br>value <sup>D</sup> |
|-----------------------------------------|-----------------------------------|-----------------------------------------------|--------------------------------|--------------------------------|--------------------------------|--------------------------------|--------------------------------|
| Peak of serum ALP (U/L, median [IQR])   | 180.00(139.50,213.50)             | 179.00(149.50,230.55)                         | 103.00(80.00, 165.50)          | <0.001                         | 1.00                           | <0.001                         | 0.003                          |
| Peak of serum TB (mg/dL, median [IQR])  | 10.38(5.59, 16.77)                | 18.75(8.15,29.51)                             | 1.11(0.74, 2.12)               | <0.001                         | 0.057                          | <0.001                         | <0.001                         |
| Peak of serum GGT (U/L, median [IQR])   | 164.00(96.25, 260.00)             | 160.00(113.00, 187.00)                        | 125.00(46.75, 336.00)          | 0.508                          |                                |                                |                                |
| Peak of serum INR (median [IQR])        | 1.07(0.99, 1.15)                  | 1.11(1.02, 1.40)                              | 0.99(0.93, 1.10)               | <0.001                         | 0.744                          | <0.001                         | 0.009                          |
| Peak of serum TC (mmol/L, median [IQR]) | 3.79(2.96, 4.42)                  | 3.78(2.45, 4.44)                              | 4.75(3.90, 5.43)               | <0.001                         | 0.957                          | <0.001                         | 0.009                          |



| Characteristic                             | HILI without CLD group<br>(n=112) | HILI with pre-existing ALD<br>group<br>(n=17) | Matched ALD group<br>( n=136 ) | <i>p</i><br>value <sup>A</sup> | <i>p</i><br>value <sup>B</sup> | <i>p</i><br>value <sup>C</sup> | <i>p</i><br>value <sup>D</sup> |
|--------------------------------------------|-----------------------------------|-----------------------------------------------|--------------------------------|--------------------------------|--------------------------------|--------------------------------|--------------------------------|
| Peak of serum TG (mmol/L, median [IQR])    | 2.32(1.61, 3.25)                  | 2.34(1.77, 3.56)                              | 1.70(1.10, 3.01)               | 0.004                          | 1.00                           | 0.009                          | 0.156                          |
| <b>Laboratory index in the recognition</b> |                                   |                                               |                                |                                |                                |                                |                                |
| Serum albumin (g/L, median [IQR])          | 37.00(35.00, 40.00)               | 35.00(30.50, 39.00)                           | 39.00(35.00, 43.00)            | 0.001                          | 0.303                          | 0.003                          | 0.021                          |
| Serum cholinesterase (U/L, median [IQR])   | 5754.50(4715.25,6615.75)          | 4506.00(3196.50,5561.00)                      | 6702.00(4861.50,8223.75)       | <0.001                         | 0.018                          | <0.001                         | <0.001                         |
| Recovery (%)                               | 97(86.6%)                         | 10(58.8%)                                     | 120(88.2%)                     | 0.011                          | 0.030                          | 1.000                          | 0.015                          |
| Chronic (%)                                | 14(12.5%)                         | 6(35.3%)                                      | 16(11.8%)                      | 0.038                          | 0.027                          | 0.860                          | 0.019                          |
| Fatal (%)                                  | 1(0.9%)                           | 1(5.9%)                                       | 0(0.0%)                        | 0.058                          |                                |                                |                                |

31

1  
2  
3  
4  
5  
6  
7 <sup>A</sup> The comparisons were analyzed among the three groups.

8  
9 <sup>B</sup> The pairwise comparison between the PMT-related HILI group without CLD and the PMT-related HILI with pre-existing ALD group.

10  
11 <sup>C</sup> The pairwise comparison between the PMT-related HILI group without CLD and the matched ALD group.

12  
13  
14 <sup>D</sup> The pairwise comparison between the PMT-related HILI with pre-existing ALD group and the matched ALD group.

15  
16 <sup>B,C,D</sup> Differences between groups in categorical variables were analyzed by the chi-squared test or Fisher's exact test, while results of multiple  
17  
18  
19 comparisons were corrected by the Bonferroni's correction.

20  
21  
22 Abbreviations: ALD, alcoholic liver disease; ALP, serum alkaline phosphatase; ALT, serum alanine transaminase; AST, serum aspartate  
23  
24 aminotransferase; BMI, body mass index; CLD, chronic liver disease; GGT, gamma-glutamyl transpeptidase; HILI, herb-induced liver injury; Ig,  
25  
26 immunoglobulin; INR, international normalized ratio; IQR, interquartile range (25-75%); PMT, *Polygonum multiflorum* Thunb.; SD, standard  
27  
28 deviation; TB, serum total bilirubin; TC: total cholesterol; TG: total glyceride  
29  
30  
31  
32  
33  
34  
35  
36  
37  
38  
39  
40  
41  
42  
43  
44  
45  
46  
47

**Table 3** The characteristics of PMT-related HILI patients with pre-existing NAFLD compared with those of PMT-related HILI patients without CLD and matched NAFLD patients.

| Characteristic                           | HILI without CLD group<br>(n=112) | HILI with pre-existing NAFLD<br>group<br>(n=8) | Matched NAFLD<br>group<br>( n=64 ) | <i>p</i><br>value <sup>A</sup> | <i>p</i><br>value <sup>B</sup> | <i>p</i><br>value <sup>C</sup> | <i>p</i><br>value <sup>D</sup> |
|------------------------------------------|-----------------------------------|------------------------------------------------|------------------------------------|--------------------------------|--------------------------------|--------------------------------|--------------------------------|
| Males (%)                                | 45(40.2%)                         | 4(50.0%)                                       | 24(37.5%)                          | 0.805                          |                                |                                |                                |
| Age (years, median [IQR])                | 43.79(33.80,53.41)                | 40.27(33.81,48.39)                             | 39.17(34.08,48.69)                 | 0.337                          |                                |                                |                                |
| BMI (kg/m <sup>2</sup> , median [IQR])   | 22.48(20.45,24.96)                | 27.16(25.48,28.53)                             | 26.15(23.69,28.53)                 | <0.001                         | 0.003                          | <0.001                         | 1.000                          |
| Diabetes mellitus (%)                    | 5(4.5%)                           | 0(0.0%)                                        | 4(6.3%)                            | 0.817                          |                                |                                |                                |
| Liver cirrhosis (%)                      | 8(6.90%)                          | 0(0.00%)                                       | 0(0.00%)                           | 0.104                          |                                |                                |                                |
| Complications (%)                        | 17(14.3%)                         | 2(25.0%)                                       | 0(0.0%)                            | 0.001                          | 1.000                          | <0.001                         | 0.009                          |
| Peak of serum ALT (U/L,<br>median [IQR]) | 1173.00(833.00,1472.05)           | 1490.50(861.75,1681.50)                        | 88.00(58.50,152.25)                | <0.001                         | 1.000                          | <0.001                         | <0.001                         |

| Characteristic                            | HILI without CLD group<br>(n=112) | HILI with pre-existing NAFLD<br>group<br>(n=8) | Matched NAFLD<br>group<br>( n=64 ) | <i>p</i><br>value <sup>A</sup> | <i>p</i><br>value <sup>B</sup> | <i>p</i><br>value <sup>C</sup> | <i>p</i><br>value <sup>D</sup> |
|-------------------------------------------|-----------------------------------|------------------------------------------------|------------------------------------|--------------------------------|--------------------------------|--------------------------------|--------------------------------|
| Peak of serum AST (U/L,<br>median [IQR])  | 716.90(493.50,1041.60)            | 945.00(645.18,1377.75)                         | 50.00(34.00, 75.25)                | <0.001                         | 0.468                          | <0.001                         | <0.001                         |
| Peak of serum ALP (U/L,<br>median [IQR])  | 180.00(139.50,213.50)             | 149.00(105.25,192.75)                          | 98.50(77.50,121.75)                | <0.001                         | 0.864                          | <0.001                         | 0.045                          |
| Peak of serum TB (mg/dL,<br>median [IQR]) | 10.38(5.59,16.77)                 | 21.08(7.65,21.93)                              | 0.74(0.57,0.90)                    | <0.001                         | 0.252                          | <0.001                         | <0.001                         |
| Peak of serum GGT (U/L,<br>median [IQR])  | 164.00(96.25,260.00)              | 209.00(196.25,257.25)                          | 80.00(40.50,141.75)                | <0.001                         | 0.396                          | <0.001                         | <0.001                         |
| Peak of serum INR (median<br>[IQR])       | 1.07(0.99,1.15)                   | 1.21(0.97,1.40)                                | 0.94(0.88, 0.96)                   | <0.001                         | 1.000                          | <0.001                         | 0.003                          |

| Characteristic                                 | HILI without CLD group<br>(n=112) | HILI with pre-existing NAFLD<br>group<br>(n=8) | Matched NAFLD<br>group<br>( n=64 ) | <i>p</i><br>value <sup>A</sup> | <i>p</i><br>value <sup>B</sup> | <i>p</i><br>value <sup>C</sup> | <i>p</i><br>value <sup>D</sup> |
|------------------------------------------------|-----------------------------------|------------------------------------------------|------------------------------------|--------------------------------|--------------------------------|--------------------------------|--------------------------------|
| Peak of serum TC (mmol/L,<br>median [IQR])     | 3.79(2.96,4.42)                   | 4.18(3.76, 4.63)                               | 5.04(4.39, 5.58)                   | <0.001                         | 0.780                          | <0.001                         | 0.084                          |
| Peak of serum TG (mmol/L,<br>median [IQR])     | 2.32(1.61,3.25)                   | 3.11(1.71,4.37)                                | 2.24(1.58,3.37)                    | 0.530                          | 0.711                          | 1.000                          | 1.000                          |
| <b>Laboratory index in the<br/>recognition</b> |                                   |                                                |                                    |                                |                                |                                |                                |
| Serum albumin (g/L,<br>median [IQR])           | 37.00(35.00,40.00)                | 39.50(33.25,40.00)                             | 42.00(40.00,44.00)                 | <0.001                         | 1.000                          | <0.001                         | 0.003                          |
| Serum cholinesterase (U/L,<br>mean±SD)         | 5664.79±1613.11                   | 5856.38±1941.11                                | 8589.23±1254.07                    | <0.001                         | 1.000                          | <0.001                         | <0.001                         |

1  
2  
3  
4  
5  
6  
7  
8  
9  
10  
11  
12  
13  
14  
15  
16  
17  
18  
19  
20  
21  
22  
23  
24  
25  
26  
27  
28  
29  
30  
31  
32  
33  
34  
35  
36  
37  
38  
39  
40  
41  
42  
43  
44  
45  
46  
47

| Characteristic | HILI without CLD group<br>(n=112) | HILI with pre-existing NAFLD<br>group<br>(n=8) | Matched NAFLD<br>group<br>( n=64 ) | <i>p</i><br>value <sup>A</sup> | <i>p</i><br>value <sup>B</sup> | <i>p</i><br>value <sup>C</sup> | <i>p</i><br>value <sup>D</sup> |
|----------------|-----------------------------------|------------------------------------------------|------------------------------------|--------------------------------|--------------------------------|--------------------------------|--------------------------------|
| Recovery (%)   | 97(86.6%)                         | 5(62.5%)                                       | 55(85.9%)                          | 0.187                          |                                |                                |                                |
| Chronic (%)    | 14(12.5%)                         | 3(37.5%)                                       | 9(14.1%)                           | 0.137                          |                                |                                |                                |
| Fatal (%)      | 1(0.9%)                           | 0(0.00%)                                       | 0(0.00%)                           | 1.000                          |                                |                                |                                |

<sup>A</sup> The comparisons were analyzed among the three groups.

<sup>B</sup> The pairwise comparison between the PMT-related HILI group without CLD and the PMT-related HILI with pre-existing NAFLD group.

<sup>C</sup> The pairwise comparison between the PMT-related HILI group without CLD and the matched NAFLD group.

<sup>D</sup> The pairwise comparison between the PMT-related HILI with pre-existing NAFLD group and the matched NAFLD group.

<sup>B,C,D</sup> Differences between groups in categorical variables were analyzed by the chi-squared test or Fisher’s exact test, while results of multiple comparisons were corrected by the Bonferroni’s correction.

Abbreviations: ALP, serum alkaline phosphatase; ALT, serum alanine transaminase; AST, serum aspartate aminotransferase; BMI, body mass

1  
2  
3  
4  
5  
6  
7 index; CLD, chronic liver disease; GGT, gamma-glutamyl transpeptidase; HILI, herb-induced liver injury; Ig, immunoglobulin; INR, international  
8  
9 normalized ratio; IQR, interquartile range (25-75%); NAFLD, non-alcoholic fatty liver disease; PMT, *Polygonum multiflorum* Thunb.; SD, standard  
10  
11 deviation; TB, serum total bilirubin; TC: total cholesterol; TG: total glyceride  
12  
13  
14  
15  
16  
17  
18  
19  
20  
21  
22  
23  
24  
25  
26  
27  
28  
29  
30  
31  
32  
33  
34  
35  
36  
37  
38  
39  
40  
41  
42  
43  
44  
45  
46  
47

**Table 4** Logistic regression for the prognosis of PMT-related HILI with and without pre-existing CLD.

| Parameters <sup>‡</sup> | Univariable |       |                | Multivariate <sup>†</sup> |       |       | <i>p</i><br>value |       |
|-------------------------|-------------|-------|----------------|---------------------------|-------|-------|-------------------|-------|
|                         | OR          | 95%CI | <i>p</i> value | OR                        | 95%CI |       |                   |       |
| <b>Chronic</b>          |             |       |                |                           |       |       |                   |       |
| Age                     | 1.023       | 0.990 | 1.058          | 0.175                     | 1.014 | 0.977 | 1.052             | 0.465 |
| Sex                     | 1.018       | 0.423 | 2.452          | 0.968                     | 0.970 | 0.348 | 2.707             | 0.954 |
| BMI                     | 1.146       | 1.006 | 1.306          | 0.040                     |       |       |                   |       |
| Pre-existing            | 3.043       | 1.201 | 7.713          | 0.019                     | 3.035 | 1.115 | 8.259             | 0.030 |
| <b>CLD</b>              |             |       |                |                           |       |       |                   |       |
| Peak value of           | 0.999       | 0.998 | 1.000          | 0.078                     | 0.999 | 0.998 | 1.000             | 0.102 |
| <b>ALT</b>              |             |       |                |                           |       |       |                   |       |
| Peak value of           | 1.025       | 0.976 | 1.075          | 0.323                     |       |       |                   |       |
| <b>total bilirubin</b>  |             |       |                |                           |       |       |                   |       |
| Peak value of           | 2.596       | 0.858 | 7.855          | 0.091                     |       |       |                   |       |
| <b>INR</b>              |             |       |                |                           |       |       |                   |       |
| Lowest                  | 0.879       | 0.802 | 0.964          | 0.006                     |       |       |                   |       |
| <b>albumin</b>          |             |       |                |                           |       |       |                   |       |
| Lowest                  | 1.000       | 0.999 | 1.000          | 0.010                     |       |       |                   |       |
| <b>Cholinesterase</b>   |             |       |                |                           |       |       |                   |       |



|                                 |       |       |         |       |       |       |        |       |
|---------------------------------|-------|-------|---------|-------|-------|-------|--------|-------|
| MELD score                      | 1.015 | 0.936 | 1.100   | 0.727 | 1.017 | 0.933 | 1.109  | 0.703 |
| <b>Mortality</b>                |       |       |         |       |       |       |        |       |
| Age                             | 1.042 | 0.965 | 1.124   | 0.293 | 1.028 | 0.960 | 1.101  | 0.433 |
| Sex                             | 0.277 | 0.028 | 2.729   | 0.271 | 0.512 | 0.085 | 3.076  | 0.465 |
| BMI                             | 1.071 | 0.804 | 1.426   | 0.640 |       |       |        |       |
| Pre-existing                    | 11.10 | 1.114 | 110.584 | 0.040 | 4.385 | 0.846 | 22.714 | 0.078 |
| CLD                             | 0     |       |         |       |       |       |        |       |
| Peak value of                   | 0.999 | 0.997 | 1.001   | 0.212 | 0.999 | 0.997 | 1.000  | 0.169 |
| <b>ALT</b>                      |       |       |         |       |       |       |        |       |
| Peak value of                   | 1.169 | 1.039 | 1.316   | 0.010 |       |       |        |       |
| <b>total bilirubin</b>          |       |       |         |       |       |       |        |       |
| Peak value of                   | 12.44 | 2.429 | 63.779  | 0.002 |       |       |        |       |
| <b>INR</b>                      |       |       |         |       |       |       |        |       |
| Lowest                          | 0.545 | 0.328 | 0.904   | 0.019 |       |       |        |       |
| <b>albumin</b>                  |       |       |         |       |       |       |        |       |
| Lowest                          | 0.997 | 0.996 | 0.999   | 0.008 |       |       |        |       |
| <b>Cholinesterase</b>           |       |       |         |       |       |       |        |       |
| MELD score                      | 1.326 | 1.088 | 1.616   | 0.005 | 1.222 | 1.052 | 1.421  | 0.009 |
| <b>Mortality and chronicity</b> |       |       |         |       |       |       |        |       |
| Age                             | 1.028 | 0.996 | 1.061   | 0.089 | 1.021 | 0.985 | 1.058  | 0.265 |

|                 |       |       |        |        |       |       |        |       |
|-----------------|-------|-------|--------|--------|-------|-------|--------|-------|
| Sex             | 0.828 | 0.363 | 1.890  | 0.654  | 0.819 | 0.300 | 2.236  | 0.696 |
| BMI             | 1.143 | 1.010 | 1.294  | 0.034  |       |       |        |       |
| Pre-existing    | 4.203 | 1.735 | 10.185 | 0.001  | 3.966 | 1.501 | 10.477 | 0.005 |
| CLD             |       |       |        |        |       |       |        |       |
| Peak value of   | 0.999 | 0.998 | 1.000  | 0.031  | 0.999 | 0.998 | 1.000  | 0.022 |
| ALT             |       |       |        |        |       |       |        |       |
| Peak value of   | 1.052 | 1.005 | 1.101  | 0.028  |       |       |        |       |
| total bilirubin |       |       |        |        |       |       |        |       |
| Peak value of   | 7.708 | 1.986 | 29.923 | 0.003  |       |       |        |       |
| INR             |       |       |        |        |       |       |        |       |
| Lowest          | 0.804 | 0.726 | 0.890  | <0.001 |       |       |        |       |
| albumin         |       |       |        |        |       |       |        |       |
| Lowest          | 0.999 | 0.999 | 1.000  | <0.001 |       |       |        |       |
| Cholinesterase  |       |       |        |        |       |       |        |       |
| MELD score      | 1.068 | 0.988 | 1.154  | 0.096  | 1.077 | 0.989 | 1.172  | 0.087 |

<sup>†</sup> Peak value of total bilirubin, INR and lowest serum albumin and cholinesterase were excluded for multivariate analysis.

<sup>‡</sup> Choosing clinically relevant variables (age and sex) and those with  $p < 0.1$  on univariate analysis. For variables with known co-linearity or high correlations, clinical judgment was used to select one predictor for additional modeling.

Abbreviations: ALT, serum alanine transaminase; BMI, body mass index; CI, confidence interval;

1  
2  
3  
4 CLD, chronic liver disease; HILI, herb-induced liver injury; INR, international normalized ratio;  
5  
6  
7 MELD, Model for End-Stage Liver Disease; OR, odds ratio; PMT, *Polygonum multiflorum* Thunb.;  
8  
9 TCM, traditional Chinese medicine  
10  
11  
12  
13  
14  
15  
16  
17  
18  
19  
20  
21  
22  
23  
24  
25  
26  
27  
28  
29  
30  
31  
32  
33  
34  
35  
36  
37  
38  
39  
40  
41  
42  
43  
44  
45  
46  
47  
48  
49  
50  
51  
52  
53  
54  
55  
56  
57  
58  
59  
60

For peer review only

1  
2  
3  
4 **Figure 1** Flowchart depicting the process for case enrollment.  
5

6 Abbreviations: ALD, alcoholic liver disease; CMV, cytomegalovirus; DILI, drug-induced  
7 liver injury; EBV, Epstein-Barr virus; HAV, hepatitis A virus; HBV, hepatitis B virus; HCV,  
8 hepatitis C virus; HEV, hepatitis E virus; HILI, herb-induced liver injury; NAFLD,  
9 non-alcoholic fatty liver disease; PMT, *Polygonum multiflorum* Thunb.  
10  
11  
12  
13  
14  
15  
16  
17  
18  
19  
20  
21  
22  
23  
24  
25  
26  
27  
28  
29  
30  
31  
32  
33  
34  
35  
36  
37  
38  
39  
40  
41  
42  
43  
44  
45  
46  
47  
48  
49  
50  
51  
52  
53  
54  
55  
56  
57  
58  
59  
60

For peer review only

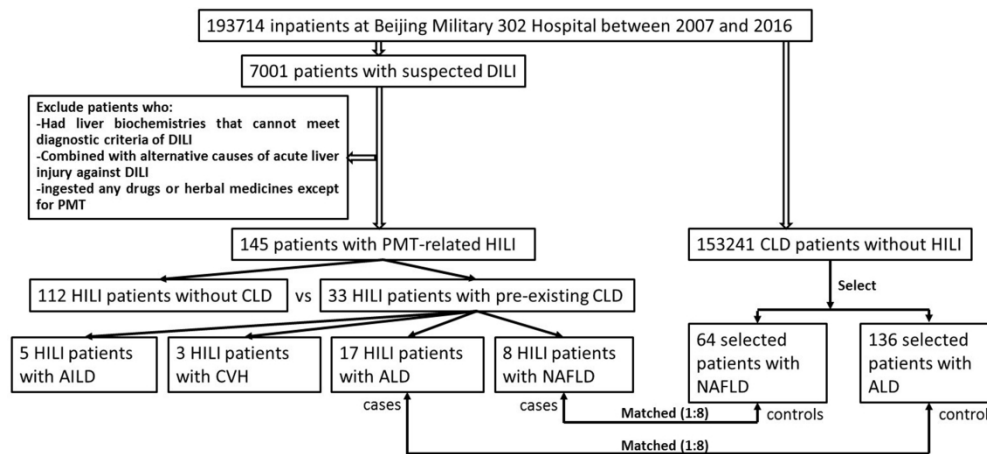

Figure 1 Flowchart depicting the process for case enrollment.

Abbreviations: ALD, alcoholic liver disease; CMV, cytomegalovirus; DILI, drug-induced liver injury; EBV, Epstein-Barr virus; HAV, hepatitis A virus; HBV, hepatitis B virus; HCV, hepatitis C virus; HEV, hepatitis E virus; HILI, herb-induced liver injury; NAFLD, non-alcoholic fatty liver disease; PMT, Polygonum multiflorum Thunb.

325x148mm (300 x 300 DPI)

1  
2  
3  
4 **Title: Association between the Concurrence of Pre-existing Chronic Liver**  
5  
6  
7 **Disease and Worse Prognosis in Patients with an Herb- *Polygonum multiflorum***  
8  
9 **Thunb. induced Liver Injury: A Case-control Study from a Specialized Liver**  
10  
11 **Disease Center in China**

12  
13  
14 Jing Jing<sup>1,2†</sup>, Rui-lin Wang<sup>2†</sup>, Xin-yan Zhao<sup>3</sup>, Yun Zhu<sup>2</sup>, Ming Niu<sup>4</sup>, Li-fu Wang<sup>2</sup>, Xue-ai Song<sup>2</sup>, Ting-ting  
15  
16 He<sup>2</sup>, Yong-qiang Sun<sup>2</sup>, Wen-tao Xu<sup>2</sup>, Si-miao Yu<sup>2</sup>, Li-ping Wang<sup>2</sup>, Yu-ming Guo<sup>4</sup>, Zhao-fang Bai<sup>4</sup>, Xiao-  
17  
18 he Xiao<sup>1,2\*</sup>, Jia-bo Wang<sup>4\*</sup>

19  
20  
21  
22  
23  
24 <sup>1</sup> Department of Integrative Medicine, Medical School of Chinese PLA, Beijing 100853,  
25  
26 China;

27  
28  
29 <sup>2</sup> Division of Integrative Medicine, Beijing 302 Hospital, Beijing 100039, China;

30  
31  
32 <sup>3</sup> Liver Research Center, Beijing Friendship Hospital, Capital Medical University, Beijing,  
33  
34 100069, China.

35  
36 <sup>4</sup> Institute of Chinese Herbal Medicine, Beijing 302 Hospital, Beijing 100039, China.

37  
38  
39  
40  
41 <sup>†</sup> Jing Jing and Rui-lin Wang contributed equally to this paper.

42  
43  
44  
45  
46 <sup>\*</sup> To whom correspondence should be addressed: Jia-bo Wang, Institute of Chinese  
47  
48 Herbal Medicine, Beijing 302 Hospital. Email: pharm\_sci@126.com; Xiao-he Xiao,  
49  
50 Department of Integrative Medicine, Medical School of Chinese PLA, Beijing 100039,  
51  
52 China; Institute of Chinese Herbal Medicine, Beijing 302 Hospital, Beijing 100039,  
53  
54

1  
2  
3  
4 China. Email: pharmacy302xxh@126.com. Jia-bo Wang (pharm\_sci@126.com) as show  
5  
6  
7 in Scholar One. Jia-bo Wang and Xiao-he Xiao contributed equally to this paper.  
8  
9  
10

11  
12 **Conflict-of-interest statement:**  
13

14 The authors declared no conflict of interest.  
15  
16

17  
18  
19 **Grant Support:** This work was supported by the National Key Technology R&D Program  
20  
21 (no. 2015ZX09501-004-001-008 and 2015ZX09501004-001-002), the National TCM  
22  
23 Industry Science and Technology Program (no. 201507004-04), the National Natural  
24  
25 Science Foundation of China (nos. 81373984 and 81403126) and Beijing Natural  
26  
27 Science Foundation (no. 7152142).  
28  
29  
30  
31  
32  
33  
34  
35  
36  
37  
38  
39  
40  
41  
42  
43  
44  
45  
46  
47  
48  
49  
50  
51  
52  
53  
54  
55  
56  
57  
58  
59  
60

1  
2  
3  
4  
5  
6  
7  
8  
9  
10  
11  
12  
13  
14  
15  
16  
17  
18  
19  
20  
21  
22  
23  
24  
25  
26  
27  
28  
29  
30  
31  
32  
33  
34  
35  
36  
37  
38  
39  
40  
41  
42  
43  
44  
45  
46  
47  
48  
49  
50  
51  
52  
53  
54  
55  
56  
57  
58  
59  
60

**Supplementary materials:**

For peer review only



Table S1 Twelve types of Chinese patent medicines with PMT associated with 2 or more patients with HILI

| Name of Chinese patent medicines with PMT | Number of cases (HILI with pre-existing CLD/entire HILI) | Constituents                                                                                                                                                                                                          | Indications                             | Suggestion for patients with pre-existing CLD in the label | Hepatotoxic information                      |
|-------------------------------------------|----------------------------------------------------------|-----------------------------------------------------------------------------------------------------------------------------------------------------------------------------------------------------------------------|-----------------------------------------|------------------------------------------------------------|----------------------------------------------|
| Yang-xue-sheng-fa capsule                 | 2/14                                                     | <i>Radix rehmanniae preparata, Radix angelica sinensis, Rhizoma et radix notopterygii, Fructus chaenomelis, Rhizoma ligustici chuanxiong, Radix paeoniae alba, Semen cuscutae, Rhizoma gastrodiae, Radix polygoni</i> | Hair loss (n=13); Alopecia areata (n=1) | Following doctor's advice                                  | Reaction labelled in the product instruction |

---

| <i>Sultiflora preparata</i> |     |                                                                                                                                                                                                                   |                                                       |      |                                  |
|-----------------------------|-----|-------------------------------------------------------------------------------------------------------------------------------------------------------------------------------------------------------------------|-------------------------------------------------------|------|----------------------------------|
| Jing-wu capsule/tablet      | 1/7 | <i>Radix polygoni Sultiflora preparata, Rhizoma Sultiflora, Fructus ligustri lucidi, Herba ecliptae</i>                                                                                                           | Hair loss (n=4); Alopecia areata (n=1); Amnesia (n=2) | None | Reaction published but unlabeled |
| Xin-yuan capsule            | 1/5 | <i>Radix polygoni Sultiflora preparata, Salviae miltiorrhizae; Rehmanniae radix</i>                                                                                                                               | Coronary heart disease (n=4); Hyperlipoidemia (n=1)   | None | Reaction published but unlabeled |
| Yan-shou tablet             | 1/4 | <i>Polygonum multiflorum Thunb., Cuscutae semen, Eucommiae cortex, Ecliptae herba, Ligustri lucidi fructus, Rehmanniae radix, Achyranthis bidentatae radix, mulberry, Sesami semen nigrum, Sojae semen nigrum</i> | Health improvement (n=3); Hyperlipoidemia (n=1)       | None | Reaction published but unlabeled |

---

|                                |     |                                                                                                                                                                                                                                                                                              |                                |                                 |                                     |
|--------------------------------|-----|----------------------------------------------------------------------------------------------------------------------------------------------------------------------------------------------------------------------------------------------------------------------------------------------|--------------------------------|---------------------------------|-------------------------------------|
| Qi-bao-mei-ran<br>pill/granule | 0/4 | <i>Radix polygoni 6ultiflora preparata, Cuscutae<br/>semen, Poria, Radix angelica sinensis, Lycii<br/>fructus, Achyranthis bidentatae radix,<br/>Psoraleae fructus</i>                                                                                                                       | Hair loss (n=4)                | Following<br>doctor's<br>advice | Reaction published<br>but unlabeled |
| Jian-yang capsule              | 1/4 | Extracts from <i>Rhizoma Polygonati, Morindae<br/>officinalis radix, Lycii fructus, Ganoderma,<br/>Radix polygoni 6ultiflora preparata, Radix<br/>Notoginseng</i>                                                                                                                            | Health<br>improvement<br>(n=4) | None                            | Reaction unknown                    |
| Gu-shen-sheng-fa pill          | 1/3 | <i>Polygonum multiflorum Thunb., Lycii fructus,<br/>Notoptergii 6ultifl et radix, Radix Polygoni<br/>6 hizome 6 ra praeparata, Chuanxiong<br/>6hizome, Chaenomelis fructus, Ligustri lucidi<br/>fructus, Radix angelica sinensis, mulberry,<br/>Salviae miltiorrhizae; Codonopsis radix,</i> | Hair loss (n=3)                | Following<br>doctor's<br>advice | Reaction unknown                    |

1  
2  
3  
4  
5  
6  
7  
8  
9  
10  
11  
12  
13  
14  
15  
16  
17  
18  
19  
20  
21  
22  
23  
24  
25  
26  
27  
28  
29  
30  
31  
32  
33  
34  
35  
36  
37  
38  
39  
40  
41  
42  
43  
44  
45  
46  
47

---

|                       |     |                                                                                                                                                                                                                                                                                                                                                                                                                                                              |                               |                                 |                                     |
|-----------------------|-----|--------------------------------------------------------------------------------------------------------------------------------------------------------------------------------------------------------------------------------------------------------------------------------------------------------------------------------------------------------------------------------------------------------------------------------------------------------------|-------------------------------|---------------------------------|-------------------------------------|
|                       |     | <i>Sesami semen nigrum</i>                                                                                                                                                                                                                                                                                                                                                                                                                                   |                               |                                 |                                     |
| An-shen-bu-nao liquid | 1/2 | <i>Cervi cornu pantotrichum, Radix polygoni</i><br><i>7 ultiflora preparata, Epimedii folium,</i><br><i>Rhizoma Zingiberis, Radix Glycyrrhizae,</i><br><i>Jujubae fructus, Vitamin B<sub>1</sub></i>                                                                                                                                                                                                                                                         | Insomnia (n=2)                | Following<br>doctor's<br>advice | Reaction unknown                    |
| Kun-bao pill          | 1/2 | <i>Ligustri lucidi fructus, Fructus Rubi, Semen</i><br><i>Cuscutae, Fructus Lycii, Polygonum</i><br><i>multijiorum Thunb., Carapax et Plastrum</i><br><i>Testudinis, Cortex Lycii, Radix Adenophorae,</i><br><i>Radix Ophiopogonis, Semen Ziziphi Spinosae,</i><br><i>Radix Rehmanniae, Radix Paeoniae Alba,</i><br><i>Radix Paeoniae Rubra, Radix Angelica</i><br><i>sinensis, Caulis Spatholobi, Concha</i><br><i>Margaritifera, Herba Dendrobii, Flos</i> | Gynecologic<br>diseases (n=2) | None                            | Reaction published<br>but unlabeled |

---

|                           |     |                                                     |                                    |               |                                                    |
|---------------------------|-----|-----------------------------------------------------|------------------------------------|---------------|----------------------------------------------------|
|                           |     | <i>Chrysanthemi, Herba Ecliptae, Folium Mori,</i>   |                                    |               |                                                    |
|                           |     | <i>Radix Cynanchi Atrati, Rhizoma</i>               |                                    |               |                                                    |
|                           |     | <i>Anemarrhenae, Radix Scutellariae</i>             |                                    |               |                                                    |
| Run-zhao-zhi-yang capsule | 2/2 | <i>Polygonum multijorum</i> Thunb., <i>Polygoni</i> | Skin diseases (n=2)                | Inappropriate | Reaction published                                 |
|                           |     | <i>Multiflori Radix Praeparata, Radix</i>           |                                    | use           | but unlabeled                                      |
|                           |     | <i>Rehmanniae, Folium Mori, Radix Sophorae</i>      |                                    |               |                                                    |
|                           |     | <i>Flavescentis, Honghuoma</i>                      |                                    |               |                                                    |
| Shou-wu-yan-shou tablet   | 0/2 | <i>Polygonum multiflorum</i> Thunb.                 | Hair loss (n=1);<br>Insomnia (n=1) | None          | Reaction labelled in<br>the product<br>instruction |

Abbreviations used: CLD, chronic liver disease; HILI, herb-induced liver injury;.PMT, *Polygonum multiflorum* Thunb.

1  
2  
3  
4  
5  
6  
7  
8  
9  
10  
11  
12  
13  
14  
15  
16  
17  
18  
19  
20  
21  
22  
23  
24  
25  
26  
27  
28  
29  
30  
31  
32  
33  
34  
35  
36  
37  
38  
39  
40  
41  
42  
43  
44  
45  
46  
47

Table S2. Herbs combined with PMT in 6 or more patients with HILI after ingestion of single PMT and its preparations.

| Names of herbs                 | Numbers of patients with HILI (n) | Numbers of patients with pre-existing CLD (n) | Clinical report of liver induced by the single herb | Effect on liver in animal/cellular experiments |                         | Hepatotoxic information by Chinese Pharmacopeia |
|--------------------------------|-----------------------------------|-----------------------------------------------|-----------------------------------------------------|------------------------------------------------|-------------------------|-------------------------------------------------|
|                                |                                   |                                               |                                                     | Hepatotoxicity                                 | Hepatoprotective effect |                                                 |
| <i>Rehmanniae radix</i>        | 40                                | 13                                            | No                                                  | No                                             | Yes                     | No                                              |
| <i>Radix angelica sinensis</i> | 31                                | 7                                             | No                                                  | No                                             | Yes                     | No                                              |
| <i>Cuscutae semen</i>          | 26                                | 4                                             | No                                                  | No                                             | No                      | No                                              |
| <i>Ligustri lucidi fructus</i> | 21                                | 5                                             | No                                                  | No                                             | Yes                     | No                                              |
| <i>Paeoniae Radix</i>          | 20                                | 5                                             | No                                                  | No                                             | Yes                     | No                                              |

---

|    |                         |    |   |     |     |     |    |
|----|-------------------------|----|---|-----|-----|-----|----|
| 1  |                         |    |   |     |     |     |    |
| 2  |                         |    |   |     |     |     |    |
| 3  |                         |    |   |     |     |     |    |
| 4  |                         |    |   |     |     |     |    |
| 5  |                         |    |   |     |     |     |    |
| 6  |                         |    |   |     |     |     |    |
| 7  | <i>Alba</i>             |    |   |     |     |     |    |
| 8  |                         |    |   |     |     |     |    |
| 9  | <i>Notoptergii</i>      | 19 | 3 | No  | No  | Yes | No |
| 10 |                         |    |   |     |     |     |    |
| 11 | <i>rhizoma et radix</i> |    |   |     |     |     |    |
| 12 |                         |    |   |     |     |     |    |
| 13 | <i>Chaenomelis</i>      | 19 | 3 | No  | No  | No  | No |
| 14 |                         |    |   |     |     |     |    |
| 15 | <i>fructus</i>          |    |   |     |     |     |    |
| 16 |                         |    |   |     |     |     |    |
| 17 | <i>Chuanxiong</i>       | 19 | 3 | No  | No  | No  | No |
| 18 |                         |    |   |     |     |     |    |
| 19 | <i>rhizoma</i>          |    |   |     |     |     |    |
| 20 |                         |    |   |     |     |     |    |
| 21 | <i>Gastrodiae</i>       | 17 | 2 | No  | No  | No  | No |
| 22 |                         |    |   |     |     |     |    |
| 23 | <i>Rhizoma</i>          |    |   |     |     |     |    |
| 24 |                         |    |   |     |     |     |    |
| 25 | <i>Ecliptae Herba</i>   | 17 | 4 | No  | No  | No  | No |
| 26 |                         |    |   |     |     |     |    |
| 27 | <i>Lycii fructus</i>    | 17 | 5 | No  | No  | No  | No |
| 28 |                         |    |   |     |     |     |    |
| 29 | <i>Salviae</i>          | 15 | 5 | Yes | Yes | No  | No |
| 30 |                         |    |   |     |     |     |    |
| 31 | <i>miltiorrhizae</i>    |    |   |     |     |     |    |
| 32 |                         |    |   |     |     |     |    |
| 33 | <i>Polygonati</i>       | 12 | 3 | No  | No  | No  | No |
| 34 |                         |    |   |     |     |     |    |
| 35 |                         |    |   |     |     |     |    |
| 36 |                         |    |   |     |     |     |    |
| 37 |                         |    |   |     |     |     |    |
| 38 |                         |    |   |     |     |     |    |
| 39 |                         |    |   |     |     |     |    |
| 40 |                         |    |   |     |     |     |    |
| 41 |                         |    |   |     |     |     |    |
| 42 |                         |    |   |     |     |     |    |
| 43 |                         |    |   |     |     |     |    |
| 44 |                         |    |   |     |     |     |    |
| 45 |                         |    |   |     |     |     |    |
| 46 |                         |    |   |     |     |     |    |
| 47 |                         |    |   |     |     |     |    |

---

1  
2  
3  
4  
5  
6  
7  
8  
9  
10  
11  
12  
13  
14  
15  
16  
17  
18  
19  
20  
21  
22  
23  
24  
25  
26  
27  
28  
29  
30  
31  
32  
33  
34  
35  
36  
37  
38  
39  
40  
41  
42  
43  
44  
45  
46  
47

---

|                          |    |   |     |    |     |    |  |
|--------------------------|----|---|-----|----|-----|----|--|
| <i>rhizoma</i>           |    |   |     |    |     |    |  |
| <i>Sesami semen</i>      | 12 | 4 | No  | No | No  | No |  |
| <i>nigrum</i>            |    |   |     |    |     |    |  |
| <i>Achyranthis</i>       | 10 | 1 | No  | No | Yes | No |  |
| <i>bidentatae radix</i>  |    |   |     |    |     |    |  |
| <i>Poria</i>             | 9  | 2 | Yes | No | Yes | No |  |
| <i>Mulberry</i>          | 8  | 2 | No  | No | No  | No |  |
| <i>Sojae Semen</i>       | 7  | 1 | No  | No | No  | No |  |
| <i>Nigrum</i>            |    |   |     |    |     |    |  |
| <i>Glycyrrhizae</i>      | 7  | 2 | No  | No | Yes | No |  |
| <i>radix et rhizoma</i>  |    |   |     |    |     |    |  |
| <i>Morindae</i>          | 6  | 2 | No  | No | No  | No |  |
| <i>officinalis radix</i> |    |   |     |    |     |    |  |

---

Abbreviations: CLD, chronic liver disease; HILI, herb-induced liver injury; PMT, *Polygonum multiflorum* Thunb.



Table S3. The clinical characteristics of all HILI patients with pre-existing CLD.

| Characteristics                                        | HILI patients with pre-existing ALD (n=17) | HILI patients with pre-existing NAFLD (n=8) | HILI patients with pre-existing chronic viral hepatitis (n=5) | HILI patients with pre-existing autoimmune liver disease (n=3) |
|--------------------------------------------------------|--------------------------------------------|---------------------------------------------|---------------------------------------------------------------|----------------------------------------------------------------|
| Males (%)                                              | 15(88.2%)                                  | 4(50.0%)                                    | 3(60.0%)                                                      | 0(0.0%)                                                        |
| Age (years, mean±SD)                                   | 45.10±11.51                                | 41.12±8.55                                  | 48.94±22.47                                                   | 54.81±12.52                                                    |
| BMI (kg/m <sup>2</sup> , mean±SD)                      | 24.13±3.60                                 | 26.71±2.19                                  | 24.66±2.49                                                    | 21.91±6.33                                                     |
| Latency (day, median [IQR])                            | 45.00(29.50,69.50)                         | 29.00(21.00,156.00)                         | 72.00(36.00,601.00)                                           | 133.00(45.00,133.00)                                           |
| Peripheral eosinophilia (×10 <sup>9</sup> /L, mean±SD) | 0.23±0.09                                  | 0.25±1.45                                   | 0.19±0.16                                                     | 0.10±0.06                                                      |
| Positive autoantibody                                  | 2(11.8%)                                   | 5(62.5%)                                    | 1(20.0%)                                                      | 3(100.0%)                                                      |
| <b>Peak values of laboratory index</b>                 |                                            |                                             |                                                               |                                                                |
| ALT (U/L, mean±SD)                                     | 1469.36±810.41                             | 1336.90±494.26                              | 1328.60±515.81                                                | 264.67±220.76                                                  |

|                                             |                       |                       |                      |                    |
|---------------------------------------------|-----------------------|-----------------------|----------------------|--------------------|
| AST (U/L, mean±SD)                          | 924.75±586.88         | 978.36±481.11         | 855.40±493.82        | 331.67±243.55      |
| ALP (U/L, mean±SD)                          | 185.63±62.21          | 169.64±98.69          | 202.00±68.02         | 235.67±88.12       |
| GGT (U/L, median [IQR])                     | 160.00(113.00,187.00) | 209.00(196.25,257.25) | 141.00(76.00,240.00) | 231(175.00,231.00) |
| TB (mg/dL, mean±SD)                         | 18.96±11.54           | 17.63±9.83            | 16.00±13.56          | 13.27±8.46         |
| INR (median, [IQR])                         | 1.11(1.02,1.40)       | 1.21(0.97,1.40)       | 0.91(0.90,2.13)      | 1.20(0.91,1.20)    |
| TC (mmol/L, mean±SD)                        | 3.62±1.52             | 4.39±1.27             | 3.50±0.95            | 4.17±2.15          |
| TG (mmol/L, mean±SD)                        | 2.61±1.12             | 3.32±1.99             | 2.68±1.10            | 2.20±0.67          |
| <b>Pattern of liver injury</b>              |                       |                       |                      |                    |
| HC/Chol/Mixed                               | 17/0/0                | 8/0/0                 | 4/1/0                | 1/1/1              |
| <b>RUCAM score (mean±SD)</b>                |                       |                       |                      |                    |
| Possible/probable/highly<br>probable        | 1/16/0                | 0/7/1                 | 0/5/0                | 1/2/0              |
| <b>Severity of Liver Injury<sup>†</sup></b> |                       |                       |                      |                    |

|                                          |            |            |            |            |
|------------------------------------------|------------|------------|------------|------------|
| Mild/Moderate/Severe/Liver failure/Fatal | 0/2/12/2/1 | 0/0/8/0/0  | 1/0/3/0/1  | 0/0/2/0/1  |
| MELD score (mean±SD)                     | 16.88±5.97 | 17.13±5.94 | 13.80±4.38 | 17.00±4.36 |
| Liver cirrhosis                          | 3/17       | 0/8        | 1/5        | 1/3        |
| <b>Prognosis</b>                         |            |            |            |            |
| Recovery (n)                             | 10         | 5          | 4          | 1          |
| Chronic (n)                              | 6          | 3          | 0          | 1          |
| Fatal (n)                                | 1          | 0          | 1          | 1          |

<sup>†</sup> The severity assessments of HILI were graded as follows<sup>31,32</sup>: mild, reversible elevations of serum ALT and/or ALP levels, TB <2.5 mg/dl and international normalized ratio (INR) <1.5; moderate elevations of serum ALT and/or ALP levels with associated TB ≥2.5 mg/dl or INR ≥1.5; severe, elevations of serum ALT and/or ALP levels and TB ≥5 mg/dl, with or without INR ≥1.5; liver failure, elevation of serum ALT and/or ALP level with TB ≥10 mg/dl or a sharp increase of 1 mg/dl per day, INR ≥1.5, with relevant ascites, hepatic encephalopathy, or other organ failure related to DILI; death or liver transplantation because of DILI.

1  
2  
3  
4  
5  
6  
7 Abbreviations: ALD, alcoholic liver disease; ALP, serum alkaline phosphatase; ALT, serum alanine transaminase; AST, serum aspartate  
8  
9 aminotransferase; BMI, body mass index; Chol, cholestatic; DILI, drug-induced liver injury; GGT, gamma-glutamyl transpeptidase; HC,  
10  
11 hepatocellular; HILI, herb-induced liver injury; Ig, immunoglobulin; INR, international normalized ratio; IQR, interquartile range (25-75%); MELD,  
12  
13 Model for End-Stage Liver Disease; NAFLD, non-alcoholic fatty liver disease; RUCAM, the Roussel Uclaf Causality Assessment Method; SD,  
14  
15 standard deviation; TB, serum total bilirubin; TC, total cholesterol; TG, total glyceride  
16  
17  
18  
19  
20  
21  
22  
23  
24  
25  
26  
27  
28  
29  
30  
31  
32  
33  
34  
35  
36  
37  
38  
39  
40  
41  
42  
43  
44  
45  
46  
47

Table S4. The comorbidities of patients with HILI.

| Names of the comorbidities | Total<br>(n=145) | HILI with pre-existing CLD<br>(n=33) | HILI without pre-existing CLD<br>(n=112) | p value |
|----------------------------|------------------|--------------------------------------|------------------------------------------|---------|
| Gastritis                  | 21 (14.5%)       | 6 (18.2%)                            | 15 (13.4%)                               | 0.332   |
| Hypertension               | 17 (11.7%)       | 4 (12.1%)                            | 13 (11.6%)                               | 0.573   |
| Cholecystic diseases       | 9 (6.2%)         | 3 (9.1%)                             | 6 (5.4%)                                 | 0.335   |
| Infectious diseases        | 8 (5.5%)         | 4 (12.1%)                            | 4 (3.6%)                                 | 0.079   |
| Cardiovascular disease     | 6 (4.1%)         | 4 (12.1%)                            | 2 (1.8%)                                 | 0.024   |
| Diabetes mellitus          | 5 (3.4%)         | 0 (0.00%)                            | 5 (4.5%)                                 | 0.269   |
| Connective tissue diseases | 4 (2.8%)         | 2 (6.1%)                             | 2 (1.8%)                                 | 0.223   |
| Kidney diseases            | 3 (2.1%)         | 1 (3.0%)                             | 2 (1.8%)                                 | 0.542   |
| Thyroid diseases           | 3 (2.1%)         | 1 (3.0%)                             | 2 (1.8%)                                 | 0.542   |
| Osteonosis                 | 2 (1.4%)         | 2 (6.1%)                             | 0 (0.0%)                                 | 0.051   |

1  
2  
3  
4  
5  
6  
7  
8  
9  
10  
11  
12  
13  
14  
15  
16  
17  
18  
19  
20  
21  
22  
23  
24  
25  
26  
27  
28  
29  
30  
31  
32  
33  
34  
35  
36  
37  
38  
39  
40  
41  
42  
43  
44  
45  
46  
47

|           |          |          |          |       |
|-----------|----------|----------|----------|-------|
| Andrology | 1 (0.7%) | 0 (0.0%) | 1 (0.9%) | 0.772 |
| Otopathy  | 1 (0.7%) | 0 (0.0%) | 1 (0.9%) | 0.772 |

Abbreviations: CLD, chronic liver disease; HILI, herb-induced liver injury

For peer review only

**Table S5.** Comparison of the clinical characteristics in the overall PMT-related HILI

patients between the recovery group and the chronic group.

| <b>Characteristics</b>                      | <b>Recovery group<br/>(n=119)</b> | <b>Chronic group<br/>(n=23)</b> | <b>p<br/>value</b> |
|---------------------------------------------|-----------------------------------|---------------------------------|--------------------|
| Males (%)                                   | 55(46.2%)                         | 10(43.5%)                       | 0.809              |
| Age (years, mean±SD)                        | 42.45±14.06                       | 47.25±10.08                     | 0.121              |
| BMI (kg/m <sup>2</sup> , mean±SD)           | 22.46(20.51,25.39)                | 24.03(22.22,28.01)              | 0.021              |
| Latency (day, median [IQR])                 | 49(31,78)                         | 57(30,121)                      | 0.803              |
| Duration of drug use (day,<br>median [IQR]) | 36(30,72)                         | 31(19,122)                      | 0.708              |
| Alcohol use <sup>†</sup> (%)                | 21(17.6%)                         | 6(26.1%)                        | 0.249              |
| Pre-existing CLD                            | 22(18.5%)                         | 9(39.1%)                        | 0.028              |
| Peak value of ALT (U/L,<br>median [IQR])    | 1247.00(874.00,1583.00)           | 1000.00(739.10,1477.40)         | 0.075              |
| Peak value of AST (U/L,<br>median [IQR])    | 739.00(493.00,1050.00)            | 800.00(547.00,1294.00)          | 0.585              |
| Peak value of ALP (U/L,<br>median [IQR])    | 176.00(141.00,214.00)             | 193.00(141.00,221.10)           | 0.958              |
| Peak value of GGT (U/L,<br>median [IQR])    | 165.00(105.00,242.00)             | 174.00(71.00,257.00)            | 0.539              |
| Peak value of TB (mg/dL,<br>median [IQR])   | 10.67(6.89,17.74)                 | 14.57(5.18,24.86)               | 0.448              |
| Peak value of INR (median                   | 1.05(0.98,1.13)                   | 1.15(1.01,1.46)                 | 0.022              |

|                                                           |                    |                    |       |
|-----------------------------------------------------------|--------------------|--------------------|-------|
| [IQR])                                                    |                    |                    |       |
| Lowest serum albumin (g/L, median [IQR])                  | 35.00(32.00,38.00) | 30.00(25.00,37.00) | 0.003 |
| Lowest cholinesterase (U/L, mean±SD)                      | 5199.61±1579.26    | 3938.26±2055.55    | 0.010 |
| TC (mmol/L, median [IQR])                                 | 3.79(2.94,4.35)    | 3.78(2.57,4.86)    | 0.771 |
| TG (mmol/L, median [IQR])                                 | 2.51(1.71,3.45)    | 2.03(1.22,3.17)    | 0.080 |
| Laboratory index in DILI recognition                      |                    |                    |       |
| WBC ( $\times 10^9/L$ , median [IQR])                     | 5.35(4.40,6.42)    | 5.26(4.12,6.79)    | 0.998 |
| HGB (g/L, mean±SD)                                        | 136.67±18.10       | 129.04±16.40       | 0.063 |
| PLT ( $\times 10^9/L$ , mean±SD)                          | 222.11±66.04       | 176.96±78.20       | 0.004 |
| peripheral eosinophilia ( $\times 10^9/L$ , median [IQR]) | 0.16(0.10,0.28)    | 0.18(0.11,0.27)    | 0.831 |
| IgA (g/L, median [IQR])                                   | 2.41(1.64,2.57)    | 2.57(2.01,3.25)    | 0.197 |
| IgG (g/L, median [IQR])                                   | 12.70(10.00,13.30) | 13.18(11.56,18.48) | 0.011 |
| IgM (g/L, median [IQR])                                   | 0.89(0.52,1.01)    | 0.84(0.63,1.11)    | 0.538 |
| <b>Pattern of liver injury</b>                            |                    |                    |       |
| HC/Chol/Mixed (%)                                         | 115/1/3            | 21/1/1             | 0.250 |
| <b>RUCAM score</b> (median [IQR])                         | 8(7,8)             | 7(6,8)             | 0.113 |
| Possible/probable/highly                                  | 7/99/13            | 2/18/3             | 0.729 |



---

|                                                 |             |            |       |
|-------------------------------------------------|-------------|------------|-------|
| probable                                        |             |            |       |
| <b>Severity of Liver Injury<sup>†</sup> (%)</b> |             |            |       |
| of column total)                                |             |            |       |
|                                                 | 7/14/91/7/0 | 1/4/14/3/1 | 0.119 |
| Mild/Moderate/Sever/Liver<br>failure/Fatal      |             |            |       |
| MELD score (mean±SD)                            | 14.41±4.77  | 15.61±7.20 | 0.451 |

---

<sup>†</sup> Patients with a history of alcoholism (alcohol intake of >2 drinks per day in women and >3 drinks per day in men) did not drink during 3 months prior to the onset of liver injury.

<sup>‡</sup> The severity assessments of HILI were graded as follows<sup>31,32</sup>: Mild, reversible elevations of serum ALT and/or ALP levels, TB <2.5 mg/dl, and international normalized ratio (INR) <1.5; moderate, elevations of serum ALT and/or ALP levels with associated TB ≥2.5 mg/dl or INR ≥1.5; severe, elevations of serum ALT and (or) ALP levels and TB ≥5 mg/dl, with or without INR ≥1.5; liver failure, elevation of serum ALT and/or ALP level with TB ≥10 mg/dl or a sharp increase of 1mg/dl per day, INR ≥1.5, with relevant ascites, hepatic encephalopathy, or other organ failure related to DILI; fatal, death or liver transplantation because of DILI.

Abbreviations: ALP, serum alkaline phosphatase; ALT, serum alanine transaminase; AST, serum aspartate aminotransferase; BMI, body mass index; Chol, cholestatic; CLD, chronic liver diseases; DILI, drug-induced liver injury; HC, hepatocellular; HGB, hemoglobin; HILI, herb-induced liver injury; INR, international normalized ratio; IQR,

1  
2  
3 interquartile range (25-75%); MELD, Model for End-Stage Liver Disease; PLT, platelets;  
4  
5  
6 RUCAM, the Roussel Uclaf Causality Assessment Method; SD, standard deviation; TB,  
7  
8 serum total bilirubin; TC, total cholesterol; TG, total glyceride; WBC, white blood cell  
9  
10  
11  
12  
13  
14  
15  
16  
17  
18  
19  
20  
21  
22  
23  
24  
25  
26  
27  
28  
29  
30  
31  
32  
33  
34  
35  
36  
37  
38  
39  
40  
41  
42  
43  
44  
45  
46  
47  
48  
49  
50  
51  
52  
53  
54  
55  
56  
57  
58  
59  
60

For peer review only

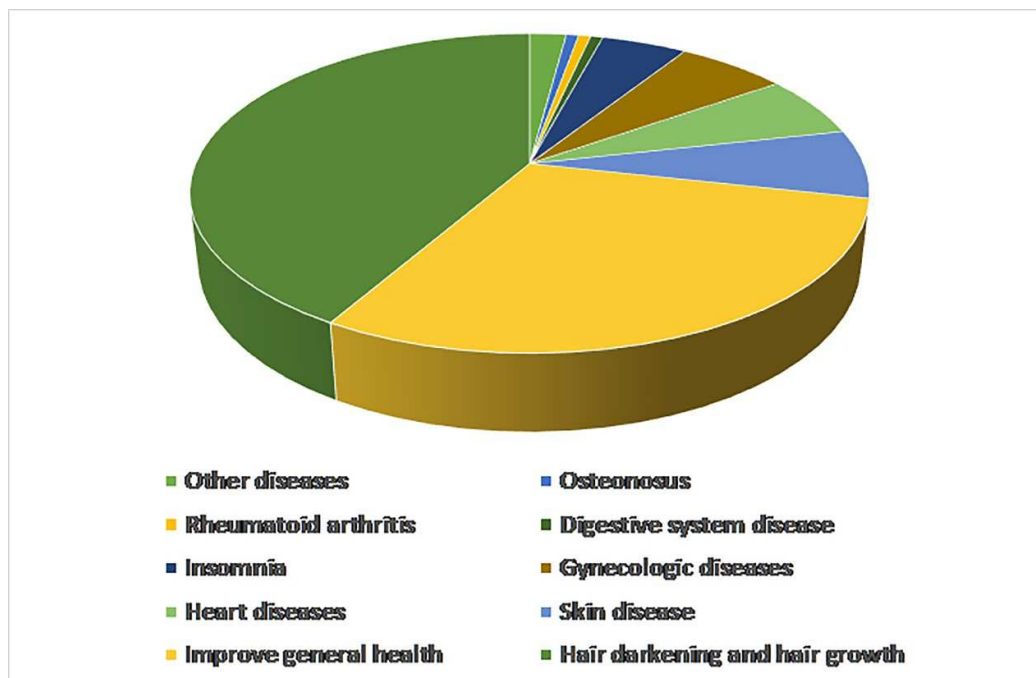

Figure S1. The indications for single PMT and its herbal products in total patients with

HILI

Abbreviations: HILI, herb-induced liver injury; PMT, *Polygonum multiflorum* Thunb.

**STROBE 2007 (v4) checklist of items to be included in reports of observational studies in epidemiology\***  
**Checklist for cohort, case-control, and cross-sectional studies (combined)**

| Section/Topic             | Item # | Recommendation                                                                                                                                                                                                                                                                                                                                                                                                                                                         | Reported on page #                    |
|---------------------------|--------|------------------------------------------------------------------------------------------------------------------------------------------------------------------------------------------------------------------------------------------------------------------------------------------------------------------------------------------------------------------------------------------------------------------------------------------------------------------------|---------------------------------------|
| Title and abstract        | 1      | (a) Indicate the study's design with a commonly used term in the title or the abstract                                                                                                                                                                                                                                                                                                                                                                                 | Page 1-2                              |
|                           |        | (b) Provide in the abstract an informative and balanced summary of what was done and what was found                                                                                                                                                                                                                                                                                                                                                                    | Page 2-3                              |
| <b>Introduction</b>       |        |                                                                                                                                                                                                                                                                                                                                                                                                                                                                        |                                       |
| Background/rationale      | 2      | Explain the scientific background and rationale for the investigation being reported                                                                                                                                                                                                                                                                                                                                                                                   | Page 5-6                              |
| Objectives                | 3      | State specific objectives, including any pre-specified hypotheses                                                                                                                                                                                                                                                                                                                                                                                                      | Page 5-6                              |
| <b>Methods</b>            |        |                                                                                                                                                                                                                                                                                                                                                                                                                                                                        |                                       |
| Study design              | 4      | Present key elements of study design early in the paper                                                                                                                                                                                                                                                                                                                                                                                                                | Page 6                                |
| Setting                   | 5      | Describe the setting, locations, and relevant dates, including periods of recruitment, exposure, follow-up, and data collection                                                                                                                                                                                                                                                                                                                                        | Page 6-7, 9                           |
| Participants              | 6      | (a) <i>Cohort study</i> —Give the eligibility criteria, and the sources and methods of selection of participants. Describe methods of follow-up<br><i>Case-control study</i> —Give the eligibility criteria, and the sources and methods of case ascertainment and control selection. Give the rationale for the choice of cases and controls<br><i>Cross-sectional study</i> —Give the eligibility criteria, and the sources and methods of selection of participants | Page 6-8                              |
|                           |        | (b) <i>Cohort study</i> —For matched studies, give matching criteria and number of exposed and unexposed<br><i>Case-control study</i> —For matched studies, give matching criteria and the number of controls per case                                                                                                                                                                                                                                                 | Page 6-8                              |
| Variables                 | 7      | Clearly define all outcomes, exposures, predictors, potential confounders, and effect modifiers. Give diagnostic criteria, if applicable                                                                                                                                                                                                                                                                                                                               | Page 7-9                              |
| Data sources/ measurement | 8*     | For each variable of interest, give sources of data and details of methods of assessment (measurement). Describe comparability of assessment methods if there is more than one group                                                                                                                                                                                                                                                                                   | Page 6-9                              |
| Bias                      | 9      | Describe any efforts to address potential sources of bias                                                                                                                                                                                                                                                                                                                                                                                                              | Page 6-7                              |
| Study size                | 10     | Explain how the study size was arrived at                                                                                                                                                                                                                                                                                                                                                                                                                              | Page 7-8                              |
| Quantitative variables    | 11     | Explain how quantitative variables were handled in the analyses. If applicable, describe which groupings were chosen and why                                                                                                                                                                                                                                                                                                                                           | Page 8-9                              |
| Statistical methods       | 12     | (a) Describe all statistical methods, including those used to control for confounding                                                                                                                                                                                                                                                                                                                                                                                  | Page 9                                |
|                           |        | (b) Describe any methods used to examine subgroups and interactions                                                                                                                                                                                                                                                                                                                                                                                                    | Page 9                                |
|                           |        | (c) Explain how missing data were addressed                                                                                                                                                                                                                                                                                                                                                                                                                            | We had no missing data in this study. |
|                           |        | (d) <i>Cohort study</i> —If applicable, explain how loss to follow-up was addressed                                                                                                                                                                                                                                                                                                                                                                                    | Page 6.                               |

|                          |     |                                                                                                                                                                                                                                                                                                                                                                                                               |                                       |
|--------------------------|-----|---------------------------------------------------------------------------------------------------------------------------------------------------------------------------------------------------------------------------------------------------------------------------------------------------------------------------------------------------------------------------------------------------------------|---------------------------------------|
|                          |     | <i>Case-control study</i> —If applicable, explain how matching of cases and controls was addressed<br><i>Cross-sectional study</i> —If applicable, describe analytical methods taking account of sampling strategy<br>(e) Describe any sensitivity analyses                                                                                                                                                   | We did not make sensitivity analyses. |
| <b>Results</b>           |     |                                                                                                                                                                                                                                                                                                                                                                                                               |                                       |
| Participants             | 13* | (a) Report numbers of individuals at each stage of study—eg numbers potentially eligible, examined for eligibility, confirmed eligible, included in the study, completing follow-up, and analysed<br>(b) Give reasons for non-participation at each stage<br>(c) Consider use of a flow diagram                                                                                                               | Page 10, 12<br>Page 9<br>Page 7, 42   |
| Descriptive data         | 14* | (a) Give characteristics of study participants (eg demographic, clinical, social) and information on exposures and potential confounders<br>(b) Indicate number of participants with missing data for each variable of interest<br>(c) <i>Cohort study</i> —Summarise follow-up time (eg, average and total amount)                                                                                           | Page 10-13<br>We had no missing data. |
| Outcome data             | 15* | <i>Cohort study</i> —Report numbers of outcome events or summary measures over time<br><i>Case-control study</i> —Report numbers in each exposure category, or summary measures of exposure<br><i>Cross-sectional study</i> —Report numbers of outcome events or summary measures                                                                                                                             | Page 13-14                            |
| Main results             | 16  | (a) Give unadjusted estimates and, if applicable, confounder-adjusted estimates and their precision (eg, 95% confidence interval). Make clear which confounders were adjusted for and why they were included<br>(b) Report category boundaries when continuous variables were categorized<br>(c) If relevant, consider translating estimates of relative risk into absolute risk for a meaningful time period | Page 13-14<br>Page 13-14              |
| Other analyses           | 17  | Report other analyses done—eg analyses of subgroups and interactions, and sensitivity analyses                                                                                                                                                                                                                                                                                                                | Page 10-14                            |
| <b>Discussion</b>        |     |                                                                                                                                                                                                                                                                                                                                                                                                               |                                       |
| Key results              | 18  | Summarise key results with reference to study objectives                                                                                                                                                                                                                                                                                                                                                      | Page 14                               |
| Limitations              | 19  | Discuss limitations of the study, taking into account sources of potential bias or imprecision. Discuss both direction and magnitude of any potential bias                                                                                                                                                                                                                                                    | Page 17-18                            |
| Interpretation           | 20  | Give a cautious overall interpretation of results considering objectives, limitations, multiplicity of analyses, results from similar studies, and other relevant evidence                                                                                                                                                                                                                                    | Page 14-18                            |
| Generalisability         | 21  | Discuss the generalisability (external validity) of the study results                                                                                                                                                                                                                                                                                                                                         | Page 14-18                            |
| <b>Other information</b> |     |                                                                                                                                                                                                                                                                                                                                                                                                               |                                       |
| Funding                  | 22  | Give the source of funding and the role of the funders for the present study and, if applicable, for the original study on which the present article is based                                                                                                                                                                                                                                                 | Page 20                               |

\*Give information separately for cases and controls in case-control studies and, if applicable, for exposed and unexposed groups in cohort and cross-sectional studies.

1  
2  
3  
4  
5  
6  
7  
8  
9  
10  
11  
12  
13  
14  
15  
16  
17  
18  
19  
20  
21  
22  
23  
24  
25  
26  
27  
28  
29  
30  
31  
32  
33  
34  
35  
36  
37  
38  
39  
40  
41  
42  
43  
44  
45  
46  
47

**Note:** An Explanation and Elaboration article discusses each checklist item and gives methodological background and published examples of transparent reporting. The STROBE checklist is best used in conjunction with this article (freely available on the Web sites of PLoS Medicine at <http://www.plosmedicine.org/>, Annals of Internal Medicine at <http://www.annals.org/>, and Epidemiology at <http://www.epidem.com/>). Information on the STROBE Initiative is available at [www.strobe-statement.org](http://www.strobe-statement.org).

For peer review only
