# Supplementary material for: Association between the concurrence of pre-existing chronic liver disease and worse prognosis in patients with an herb- Polygonum multiflorum thunb. induced liver injury: a case-control study from a specialised liver disease center in China
Source: PubMed Central journal article supplement — BMJ Open. 2019 Jan 15;9(1):e023567. doi: 10.1136/bmjopen-2018-023567 (PMC6340630; doi:10.1136/bmjopen-2018-023567), 2019-01-15
Supplement: bmjopen-2018-023567supp001.pdf [file bmjopen-2018-023567supp001.pdf]

**Title: Association between the Concurrence of Pre-existing Chronic Liver Disease and Worse Prognosis in Patients with an Herb- *Polygonum multiflorum* Thunb. induced Liver Injury: A Case-control Study from a Specialized Liver Disease Center in China**

Jing Jing<sup>1, 2†</sup>, Rui-lin Wang<sup>2†</sup>, Xin-yan Zhao<sup>3</sup>, Yun Zhu<sup>2</sup>, Ming Niu<sup>4</sup>, Li-fu Wang<sup>2</sup>, Xue-ai Song<sup>2</sup>, Ting-ting He<sup>2</sup>, Yong-qiang Sun<sup>2</sup>, Wen-tao Xu<sup>2</sup>, Si-miao Yu<sup>2</sup>, Li-ping Wang<sup>2</sup>, Yu-ming Guo<sup>4</sup>, Zhao-fang Bai<sup>4</sup>, Xiao-he Xiao<sup>1, 2\*</sup>, Jia-bo Wang<sup>4\*</sup>

<sup>1</sup> Department of Integrative Medicine, Medical School of Chinese PLA, Beijing 100853, China;

<sup>2</sup> Division of Integrative Medicine, Beijing 302 Hospital, Beijing 100039, China;

<sup>3</sup> Liver Research Center, Beijing Friendship Hospital, Capital Medical University, Beijing, 100069, China.

<sup>4</sup> Institute of Chinese Herbal Medicine, Beijing 302 Hospital, Beijing 100039, China.

† Jing Jing and Rui-lin Wang contributed equally to this paper.

\* To whom correspondence should be addressed: Jia-bo Wang, Institute of Chinese Herbal Medicine, Beijing 302 Hospital. Email: pharm\_sci@126.com; Xiao-he Xiao, Department of Integrative Medicine, Medical School of Chinese PLA, Beijing 100039, China; Institute of Chinese Herbal Medicine, Beijing 302 Hospital, Beijing 100039,

China. Email: pharmacy302xxh@126.com. Jia-bo Wang (pharm\_sci@126.com) as show in Scholar One. Jia-bo Wang and Xiao-he Xiao contributed equally to this paper.

**Conflict-of-interest statement:**

The authors declared no conflict of interest.

**Grant Support:** This work was supported by the National Key Technology R&D Program (no. 2015ZX09501-004-001-008 and 2015ZX09501004-001-002), the National TCM Industry Science and Technology Program (no. 201507004-04), the National Natural Science Foundation of China (nos. 81373984 and 81403126) and Beijing Natural Science Foundation (no. 7152142).

**Supplementary materials:**

Table S1 Twelve types of Chinese patent medicines with PMT associated with 2 or more patients with HILI

| Name of Chinese patent medicines with PMT | Number of cases (HILI with pre-existing CLD/entire HILI) | Constituents                                                                                                                                                                                                          | Indications                             | Suggestion for patients with pre-existing CLD in the label | Hepatotoxic information                      |
|-------------------------------------------|----------------------------------------------------------|-----------------------------------------------------------------------------------------------------------------------------------------------------------------------------------------------------------------------|-----------------------------------------|------------------------------------------------------------|----------------------------------------------|
| Yang-xue-sheng-fa capsule                 | 2/14                                                     | <i>Radix rehmanniae preparata, Radix angelica sinensis, Rhizoma et radix notopterygii, Fructus chaenomelis, Rhizoma ligustici chuanxiong, Radix paeoniae alba, Semen cuscutae, Rhizoma gastrodiae, Radix polygoni</i> | Hair loss (n=13); Alopecia areata (n=1) | Following doctor's advice                                  | Reaction labelled in the product instruction |

---

| <i>5ultiflora preparata</i> |     |                                                                                                                                                                                                                   |                                                       |      |                                  |
|-----------------------------|-----|-------------------------------------------------------------------------------------------------------------------------------------------------------------------------------------------------------------------|-------------------------------------------------------|------|----------------------------------|
| Jing-wu capsule/tablet      | 1/7 | <i>Radix polygoni 5ultiflora preparata, Rhizoma 5 ultiflora, Fructus ligustri lucidi, Herba ecliptae</i>                                                                                                          | Hair loss (n=4); Alopecia areata (n=1); Amnesia (n=2) | None | Reaction published but unlabeled |
| Xin-yuan capsule            | 1/5 | <i>Radix polygoni 5ultiflora preparata, Salviae miltiorrhizae; Rehmanniae radix</i>                                                                                                                               | Coronary heart disease (n=4); Hyperlipoidemia (n=1)   | None | Reaction published but unlabeled |
| Yan-shou tablet             | 1/4 | <i>Polygonum multiflorum Thunb., Cuscutae semen, Eucommiae cortex, Ecliptae herba, Ligustri lucidi fructus, Rehmanniae radix, Achyranthis bidentatae radix, mulberry, Sesami semen nigrum, Sojae semen nigrum</i> | Health improvement (n=3); Hyperlipoidemia (n=1)       | None | Reaction published but unlabeled |

---

|                                |     |                                                                                                                                                                                                                                                                           |                                |                                 |                                     |
|--------------------------------|-----|---------------------------------------------------------------------------------------------------------------------------------------------------------------------------------------------------------------------------------------------------------------------------|--------------------------------|---------------------------------|-------------------------------------|
| Qi-bao-mei-ran<br>pill/granule | 0/4 | <i>Radix polygoni Multiflora preparata, Cuscutae semen, Poria, Radix angelica sinensis, Lycii fructus, Achyranthis bidentatae radix, Psoraleae fructus</i>                                                                                                                | Hair loss (n=4)                | Following<br>doctor's<br>advice | Reaction published<br>but unlabeled |
| Jian-yang capsule              | 1/4 | Extracts from <i>Rhizoma Polygonati, Morindae officinalis radix, Lycii fructus, Ganoderma, Radix polygoni Multiflora preparata, Radix Notoginseng</i>                                                                                                                     | Health<br>improvement<br>(n=4) | None                            | Reaction unknown                    |
| Gu-shen-sheng-fa pill          | 1/3 | <i>Polygonum multiflorum Thunb., Lycii fructus, Notoptergii 6 ultifl et radix, Radix Polygoni 6 hizome 6 ra praeparata, Chuanxiong 6hizome, Chaenomelis fructus, Ligustri lucidi fructus, Radix angelica sinensis, mulberry, Salviae miltiorrhizae; Codonopsis radix,</i> | Hair loss (n=3)                | Following<br>doctor's<br>advice | Reaction unknown                    |

---

| <i>Sesami semen nigrum</i> |     |                                                                                                                                                                                                                                                                                                                                                                              |                            |                           |                                  |
|----------------------------|-----|------------------------------------------------------------------------------------------------------------------------------------------------------------------------------------------------------------------------------------------------------------------------------------------------------------------------------------------------------------------------------|----------------------------|---------------------------|----------------------------------|
| An-shen-bu-nao liquid      | 1/2 | <i>Cervi cornu pantotrichum, Radix polygoni 7 ultiflora preparata, Epimedii folium, Rhizoma Zingiberis, Radix Glycyrrhizae, Jujubae fructus, Vitamin B<sub>1</sub></i>                                                                                                                                                                                                       | Insomnia (n=2)             | Following doctor's advice | Reaction unknown                 |
| Kun-bao pill               | 1/2 | <i>Ligustri lucidi fructus, Fructus Rubi, Semen Cuscutae, Fructus Lycii, Polygonum multijiorum Thunb., Carapax et Plastrum Testudinis, Cortex Lycii, Radix Adenophorae, Radix Ophiopogonis, Semen Ziziphi Spinosae, Radix Rehmanniae, Radix Paeoniae Alba, Radix Paeoniae Rubra, Radix Angelica sinensis, Caulis Spatholobi, Concha Margaritifera, Herba Dendrobii, Flos</i> | Gynecologic diseases (n=2) | None                      | Reaction published but unlabeled |

---

---

|                           |     |                                                      |                                    |               |                                                    |
|---------------------------|-----|------------------------------------------------------|------------------------------------|---------------|----------------------------------------------------|
|                           |     | <i>Chrysanthemi, Herba Ecliptae, Folium Mori,</i>    |                                    |               |                                                    |
|                           |     | <i>Radix Cynanchi Atrati, Rhizoma</i>                |                                    |               |                                                    |
|                           |     | <i>Anemarrhenae, Radix Scutellariae</i>              |                                    |               |                                                    |
| Run-zhao-zhi-yang capsule | 2/2 | <i>Polygonum multijiorum</i> Thunb., <i>Polygoni</i> | Skin diseases (n=2)                | Inappropriate | Reaction published                                 |
|                           |     | <i>Multiflori Radix Praeparata, Radix</i>            |                                    | use           | but unlabeled                                      |
|                           |     | <i>Rehmanniae, Folium Mori, Radix Sophorae</i>       |                                    |               |                                                    |
|                           |     | <i>Flavescentis, Honghuoma</i>                       |                                    |               |                                                    |
| Shou-wu-yan-shou tablet   | 0/2 | <i>Polygonum multiflorum</i> Thunb.                  | Hair loss (n=1);<br>Insomnia (n=1) | None          | Reaction labelled in<br>the product<br>instruction |

---

Abbreviations used: CLD, chronic liver disease; HILI, herb-induced liver injury;.PMT, *Polygonum multiflorum* Thunb.



Table S2. Herbs combined with PMT in 6 or more patients with HILI after ingestion of single PMT and its preparations.

| Names of herbs                 | Numbers of patients with HILI (n) | Numbers of patients with pre-existing CLD (n) | Clinical report of liver reaction induced by the single herb | Effect on liver in animal/cellular experiments |                         | Hepatotoxic information by Chinese Pharmacopeia |
|--------------------------------|-----------------------------------|-----------------------------------------------|--------------------------------------------------------------|------------------------------------------------|-------------------------|-------------------------------------------------|
|                                |                                   |                                               |                                                              | Hepatotoxicity                                 | Hepatoprotective effect |                                                 |
| <i>Rehmanniae radix</i>        | 40                                | 13                                            | No                                                           | No                                             | Yes                     | No                                              |
| <i>Radix angelica sinensis</i> | 31                                | 7                                             | No                                                           | No                                             | Yes                     | No                                              |
| <i>Cuscutae semen</i>          | 26                                | 4                                             | No                                                           | No                                             | No                      | No                                              |
| <i>Ligustri lucidi fructus</i> | 21                                | 5                                             | No                                                           | No                                             | Yes                     | No                                              |
| <i>Paeoniae Radix</i>          | 20                                | 5                                             | No                                                           | No                                             | Yes                     | No                                              |

---

|                         |    |   |     |     |     |    |
|-------------------------|----|---|-----|-----|-----|----|
| <i>Alba</i>             |    |   |     |     |     |    |
| <i>Notoptergii</i>      | 19 | 3 | No  | No  | Yes | No |
| <i>rhizoma et radix</i> |    |   |     |     |     |    |
| <i>Chaenomelis</i>      | 19 | 3 | No  | No  | No  | No |
| <i>fructus</i>          |    |   |     |     |     |    |
| <i>Chuanxiong</i>       | 19 | 3 | No  | No  | No  | No |
| <i>rhizoma</i>          |    |   |     |     |     |    |
| <i>Gastrodiae</i>       | 17 | 2 | No  | No  | No  | No |
| <i>Rhizoma</i>          |    |   |     |     |     |    |
| <i>Ecliptae Herba</i>   | 17 | 4 | No  | No  | No  | No |
| <i>Lycii fructus</i>    | 17 | 5 | No  | No  | No  | No |
| <i>Salviae</i>          | 15 | 5 | Yes | Yes | No  | No |
| <i>miltiorrhizae</i>    |    |   |     |     |     |    |
| <i>Polygonati</i>       | 12 | 3 | No  | No  | No  | No |

---

---

|                          |    |   |     |    |     |    |  |
|--------------------------|----|---|-----|----|-----|----|--|
| <i>rhizoma</i>           |    |   |     |    |     |    |  |
| <i>Sesami semen</i>      | 12 | 4 | No  | No | No  | No |  |
| <i>nigrum</i>            |    |   |     |    |     |    |  |
| <i>Achyranthis</i>       | 10 | 1 | No  | No | Yes | No |  |
| <i>bidentatae radix</i>  |    |   |     |    |     |    |  |
| <i>Poria</i>             | 9  | 2 | Yes | No | Yes | No |  |
| <i>Mulberry</i>          | 8  | 2 | No  | No | No  | No |  |
| <i>Sojae Semen</i>       | 7  | 1 | No  | No | No  | No |  |
| <i>Nigrum</i>            |    |   |     |    |     |    |  |
| <i>Glycyrrhizae</i>      | 7  | 2 | No  | No | Yes | No |  |
| <i>radix et rhizoma</i>  |    |   |     |    |     |    |  |
| <i>Morindae</i>          | 6  | 2 | No  | No | No  | No |  |
| <i>officinalis radix</i> |    |   |     |    |     |    |  |

---

Abbreviations: CLD, chronic liver disease; HILI, herb-induced liver injury; PMT, *Polygonum multiflorum* Thunb.

Table S3. The clinical characteristics of all HILI patients with pre-existing CLD.

| Characteristics                                        | HILI patients with pre-existing ALD (n=17) | HILI patients with pre-existing NAFLD (n=8) | HILI patients with pre-existing chronic viral hepatitis (n=5) | HILI patients with pre-existing autoimmune liver disease (n=3) |
|--------------------------------------------------------|--------------------------------------------|---------------------------------------------|---------------------------------------------------------------|----------------------------------------------------------------|
| Males (%)                                              | 15(88.2%)                                  | 4(50.0%)                                    | 3(60.0%)                                                      | 0(0.0%)                                                        |
| Age (years, mean±SD)                                   | 45.10±11.51                                | 41.12±8.55                                  | 48.94±22.47                                                   | 54.81±12.52                                                    |
| BMI (kg/m <sup>2</sup> , mean±SD)                      | 24.13±3.60                                 | 26.71±2.19                                  | 24.66±2.49                                                    | 21.91±6.33                                                     |
| Latency (day, median [IQR])                            | 45.00(29.50,69.50)                         | 29.00(21.00,156.00)                         | 72.00(36.00,601.00)                                           | 133.00(45.00,133.00)                                           |
| Peripheral eosinophilia (×10 <sup>9</sup> /L, mean±SD) | 0.23±0.09                                  | 0.25±1.45                                   | 0.19±0.16                                                     | 0.10±0.06                                                      |
| Positive autoantibody                                  | 2(11.8%)                                   | 5(62.5%)                                    | 1(20.0%)                                                      | 3(100.0%)                                                      |
| <b>Peak values of laboratory index</b>                 |                                            |                                             |                                                               |                                                                |
| ALT (U/L, mean±SD)                                     | 1469.36±810.41                             | 1336.90±494.26                              | 1328.60±515.81                                                | 264.67±220.76                                                  |

|                                             |                       |                       |                      |                    |
|---------------------------------------------|-----------------------|-----------------------|----------------------|--------------------|
| AST (U/L, mean±SD)                          | 924.75±586.88         | 978.36±481.11         | 855.40±493.82        | 331.67±243.55      |
| ALP (U/L, mean±SD)                          | 185.63±62.21          | 169.64±98.69          | 202.00±68.02         | 235.67±88.12       |
| GGT (U/L, median [IQR])                     | 160.00(113.00,187.00) | 209.00(196.25,257.25) | 141.00(76.00,240.00) | 231(175.00,231.00) |
| TB (mg/dL, mean±SD)                         | 18.96±11.54           | 17.63±9.83            | 16.00±13.56          | 13.27±8.46         |
| INR (median, [IQR])                         | 1.11(1.02,1.40)       | 1.21(0.97,1.40)       | 0.91(0.90,2.13)      | 1.20(0.91,1.20)    |
| TC (mmol/L, mean±SD)                        | 3.62±1.52             | 4.39±1.27             | 3.50±0.95            | 4.17±2.15          |
| TG (mmol/L, mean±SD)                        | 2.61±1.12             | 3.32±1.99             | 2.68±1.10            | 2.20±0.67          |
| <b>Pattern of liver injury</b>              |                       |                       |                      |                    |
| HC/Chol/Mixed                               | 17/0/0                | 8/0/0                 | 4/1/0                | 1/1/1              |
| <b>RUCAM score (mean±SD)</b>                |                       |                       |                      |                    |
| Possible/probable/highly<br>probable        | 1/16/0                | 0/7/1                 | 0/5/0                | 1/2/0              |
| <b>Severity of Liver Injury<sup>†</sup></b> |                       |                       |                      |                    |

|                                          |            |            |            |            |
|------------------------------------------|------------|------------|------------|------------|
| Mild/Moderate/Severe/Liver failure/Fatal | 0/2/12/2/1 | 0/0/8/0/0  | 1/0/3/0/1  | 0/0/2/0/1  |
| MELD score (mean±SD)                     | 16.88±5.97 | 17.13±5.94 | 13.80±4.38 | 17.00±4.36 |
| Liver cirrhosis                          | 3/17       | 0/8        | 1/5        | 1/3        |
| <b>Prognosis</b>                         |            |            |            |            |
| Recovery (n)                             | 10         | 5          | 4          | 1          |
| Chronic (n)                              | 6          | 3          | 0          | 1          |
| Fatal (n)                                | 1          | 0          | 1          | 1          |

† The severity assessments of HILI were graded as follows<sup>31,32</sup>: mild, reversible elevations of serum ALT and/or ALP levels, TB <2.5 mg/dl and international normalized ratio (INR) <1.5; moderate elevations of serum ALT and/or ALP levels with associated TB ≥2.5 mg/dl or INR ≥1.5; severe, elevations of serum ALT and/or ALP levels and TB ≥5 mg/dl, with or without INR≥1.5; liver failure, elevation of serum ALT and/or ALP level with TB ≥10 mg/dl or a sharp increase of 1 mg/dl per day, INR ≥1.5, with relevant ascites, hepatic encephalopathy, or other organ failure related to DILI; death or liver transplantation because of DILI.

Abbreviations: ALD, alcoholic liver disease; ALP, serum alkaline phosphatase; ALT, serum alanine transaminase; AST, serum aspartate aminotransferase; BMI, body mass index; Chol, cholestatic; DILI, drug-induced liver injury; GGT, gamma-glutamyl transpeptidase; HC, hepatocellular; HILI, herb-induced liver injury; Ig, immunoglobulin; INR, international normalized ratio; IQR, interquartile range (25-75%); MELD, Model for End-Stage Liver Disease; NAFLD, non-alcoholic fatty liver disease; RUCAM, the Roussel Uclaf Causality Assessment Method; SD, standard deviation; TB, serum total bilirubin; TC, total cholesterol; TG, total glyceride

Table S4. The comorbidities of patients with HILI.

| <b>Names of the comorbidities</b> | <b>Total<br/>(n=145)</b> | <b>HILI with pre-existing CLD<br/>(n=33)</b> | <b>HILI without pre-existing CLD<br/>(n=112)</b> | <b>p value</b> |
|-----------------------------------|--------------------------|----------------------------------------------|--------------------------------------------------|----------------|
| Gastritis                         | 21 (14.5%)               | 6 (18.2%)                                    | 15 (13.4%)                                       | 0.332          |
| Hypertension                      | 17 (11.7%)               | 4 (12.1%)                                    | 13 (11.6%)                                       | 0.573          |
| Cholecystic diseases              | 9 (6.2%)                 | 3 (9.1%)                                     | 6 (5.4%)                                         | 0.335          |
| Infectious diseases               | 8 (5.5%)                 | 4 (12.1%)                                    | 4 (3.6%)                                         | 0.079          |
| Cardiovascular disease            | 6 (4.1%)                 | 4 (12.1%)                                    | 2 (1.8%)                                         | 0.024          |
| Diabetes mellitus                 | 5 (3.4%)                 | 0 (0.00%)                                    | 5 (4.5%)                                         | 0.269          |
| Connective tissue diseases        | 4 (2.8%)                 | 2 (6.1%)                                     | 2(1.8%)                                          | 0.223          |
| Kidney diseases                   | 3 (2.1%)                 | 1 (3.0%)                                     | 2 (1.8%)                                         | 0.542          |
| Thyroid diseases                  | 3 (2.1%)                 | 1 (3.0%)                                     | 2 (1.8%)                                         | 0.542          |
| Osteonosis                        | 2 (1.4%)                 | 2 (6.1%)                                     | 0 (0.0%)                                         | 0.051          |



---

|           |          |          |          |       |
|-----------|----------|----------|----------|-------|
| Andrology | 1 (0.7%) | 0 (0.0%) | 1 (0.9%) | 0.772 |
| Otopathy  | 1 (0.7%) | 0 (0.0%) | 1 (0.9%) | 0.772 |

---

Abbreviations: CLD, chronic liver disease; HILI, herb-induced liver injury

**Table S5.** Comparison of the clinical characteristics in the overall PMT-related HILI

patients between the recovery group and the chronic group.

| <b>Characteristics</b>                      | <b>Recovery group<br/>(n=119)</b> | <b>Chronic group<br/>(n=23)</b> | <b><i>p</i><br/>value</b> |
|---------------------------------------------|-----------------------------------|---------------------------------|---------------------------|
| Males (%)                                   | 55(46.2%)                         | 10(43.5%)                       | 0.809                     |
| Age (years, mean±SD)                        | 42.45±14.06                       | 47.25±10.08                     | 0.121                     |
| BMI (kg/m <sup>2</sup> , mean±SD)           | 22.46(20.51,25.39)                | 24.03(22.22,28.01)              | 0.021                     |
| Latency (day, median [IQR])                 | 49(31,78)                         | 57(30,121)                      | 0.803                     |
| Duration of drug use (day,<br>median [IQR]) | 36(30,72)                         | 31(19,122)                      | 0.708                     |
| Alcohol use <sup>†</sup> (%)                | 21(17.6%)                         | 6(26.1%)                        | 0.249                     |
| Pre-existing CLD                            | 22(18.5%)                         | 9(39.1%)                        | 0.028                     |
| Peak value of ALT (U/L,<br>median [IQR])    | 1247.00(874.00,1583.00)           | 1000.00(739.10,1477.40)         | 0.075                     |
| Peak value of AST (U/L,<br>median [IQR])    | 739.00(493.00,1050.00)            | 800.00(547.00,1294.00)          | 0.585                     |
| Peak value of ALP (U/L,<br>median [IQR])    | 176.00(141.00,214.00)             | 193.00(141.00,221.10)           | 0.958                     |
| Peak value of GGT (U/L,<br>median [IQR])    | 165.00(105.00,242.00)             | 174.00(71.00,257.00)            | 0.539                     |
| Peak value of TB (mg/dL,<br>median [IQR])   | 10.67(6.89,17.74)                 | 14.57(5.18,24.86)               | 0.448                     |
| Peak value of INR (median                   | 1.05(0.98,1.13)                   | 1.15(1.01,1.46)                 | 0.022                     |

|                                                             |                    |                    |       |
|-------------------------------------------------------------|--------------------|--------------------|-------|
| [IQR])                                                      |                    |                    |       |
| Lowest serum albumin (g/L, median [IQR])                    | 35.00(32.00,38.00) | 30.00(25.00,37.00) | 0.003 |
| Lowest cholinesterase (U/L, mean±SD)                        | 5199.61±1579.26    | 3938.26±2055.55    | 0.010 |
| TC (mmol/L, median [IQR])                                   | 3.79(2.94,4.35)    | 3.78(2.57,4.86)    | 0.771 |
| TG (mmol/L, median [IQR])                                   | 2.51(1.71,3.45)    | 2.03(1.22,3.17)    | 0.080 |
| Laboratory index in DILI recognition                        |                    |                    |       |
| WBC (×10 <sup>9</sup> /L, median [IQR])                     | 5.35(4.40,6.42)    | 5.26(4.12,6.79)    | 0.998 |
| HGB (g/L, mean±SD)                                          | 136.67±18.10       | 129.04±16.40       | 0.063 |
| PLT (×10 <sup>9</sup> /L, mean±SD)                          | 222.11±66.04       | 176.96±78.20       | 0.004 |
| peripheral eosinophilia (×10 <sup>9</sup> /L, median [IQR]) | 0.16(0.10,0.28)    | 0.18(0.11,0.27)    | 0.831 |
| IgA (g/L, median [IQR])                                     | 2.41(1.64,2.57)    | 2.57(2.01,3.25)    | 0.197 |
| IgG (g/L, median [IQR])                                     | 12.70(10.00,13.30) | 13.18(11.56,18.48) | 0.011 |
| IgM (g/L, median [IQR])                                     | 0.89(0.52,1.01)    | 0.84(0.63,1.11)    | 0.538 |
| <b>Pattern of liver injury</b>                              |                    |                    |       |
| HC/Chol/Mixed (%)                                           | 115/1/3            | 21/1/1             | 0.250 |
| <b>RUCAM score</b> (median [IQR])                           | 8(7,8)             | 7(6,8)             | 0.113 |
| Possible/probable/highly                                    | 7/99/13            | 2/18/3             | 0.729 |

---

probable

**Severity of Liver Injury<sup>†</sup> (%)**

of column total)

|                                            |             |            |       |
|--------------------------------------------|-------------|------------|-------|
|                                            | 7/14/91/7/0 | 1/4/14/3/1 | 0.119 |
| Mild/Moderate/Sever/Liver<br>failure/Fatal |             |            |       |
| MELD score (mean±SD)                       | 14.41±4.77  | 15.61±7.20 | 0.451 |

---

<sup>†</sup> Patients with a history of alcoholism (alcohol intake of >2 drinks per day in women and >3 drinks per day in men) did not drink during 3 months prior to the onset of liver injury.

<sup>‡</sup> The severity assessments of HILI were graded as follows<sup>31,32</sup>: Mild, reversible elevations of serum ALT and/or ALP levels, TB <2.5 mg/dl, and international normalized ratio (INR) <1.5; moderate, elevations of serum ALT and/or ALP levels with associated TB ≥2.5 mg/dl or INR ≥1.5; severe, elevations of serum ALT and (or) ALP levels and TB ≥5 mg/dl, with or without INR ≥1.5; liver failure, elevation of serum ALT and/or ALP level with TB ≥10 mg/dl or a sharp increase of 1mg/dl per day, INR ≥1.5, with relevant ascites, hepatic encephalopathy, or other organ failure related to DILI; fatal, death or liver transplantation because of DILI.

Abbreviations: ALP, serum alkaline phosphatase; ALT, serum alanine transaminase; AST, serum aspartate aminotransferase; BMI, body mass index; Chol, cholestatic; CLD, chronic liver diseases; DILI, drug-induced liver injury; HC, hepatocellular; HGB, hemoglobin; HILI, herb-induced liver injury; INR, international normalized ratio; IQR,

interquartile range (25-75%); MELD, Model for End-Stage Liver Disease; PLT, platelets;  
RUCAM, the Roussel Uclaf Causality Assessment Method; SD, standard deviation; TB,  
serum total bilirubin; TC, total cholesterol; TG, total glyceride; WBC, white blood cell

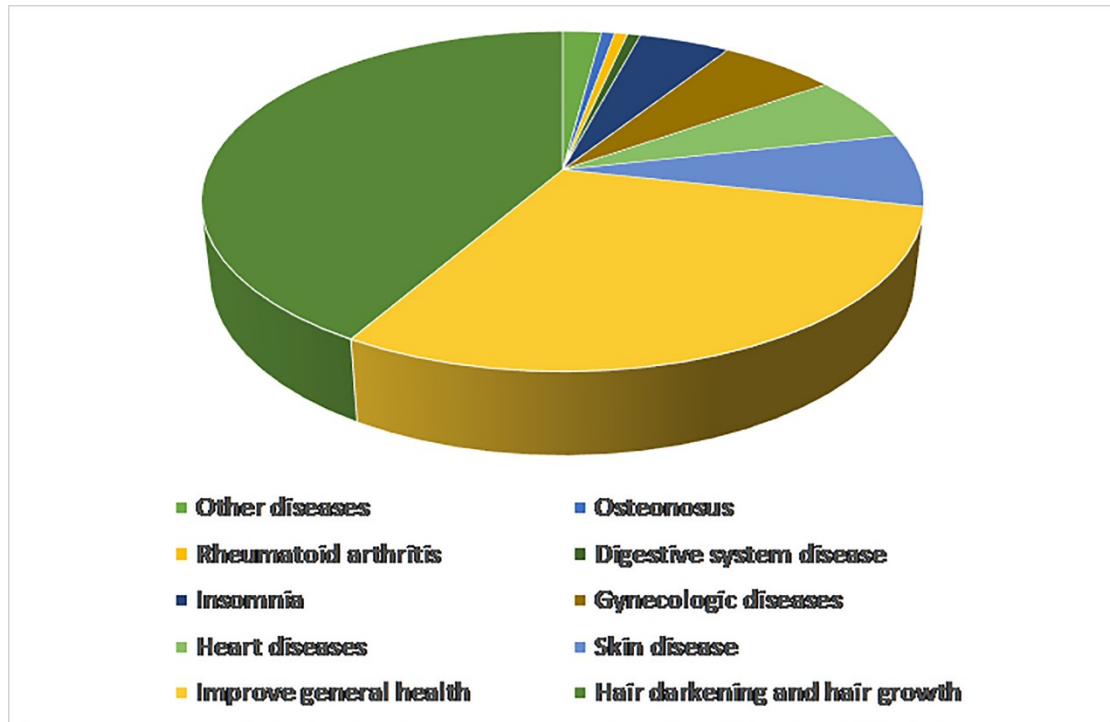

**Figure S1.** The indications for single PMT and its herbal products in total patients with HILI

Abbreviations: HILI, herb-induced liver injury; PMT, *Polygonum multiflorum* Thunb.
